# Supplementary material for: Assessing the effect of empathy-enhancing interventions in health education and training: a systematic review of randomised controlled trials
Source: PubMed Central journal article supplement — BMJ Open. 2020 Sep 25;10(9):e036471. doi: 10.1136/bmjopen-2019-036471 (PMC7520826; doi:10.1136/bmjopen-2019-036471), 2020-09-25
Supplement: bmjopen-2019-036471.draft_revisions.pdf [file bmjopen-2019-036471.draft_revisions.pdf]

# BMJ Open

BMJ Open is committed to open peer review. As part of this commitment we make the peer review history of every article we publish publicly available.

When an article is published we post the peer reviewers' comments and the authors' responses online. We also post the versions of the paper that were used during peer review. These are the versions that the peer review comments apply to.

The versions of the paper that follow are the versions that were submitted during the peer review process. They are not the versions of record or the final published versions. They should not be cited or distributed as the published version of this manuscript.

BMJ Open is an open access journal and the full, final, typeset and author-corrected version of record of the manuscript is available on our site with no access controls, subscription charges or pay-per-view fees (<http://bmjopen.bmj.com>).

If you have any questions on BMJ Open's open peer review process please email [info.bmjopen@bmj.com](mailto:info.bmjopen@bmj.com)

# BMJ Open

## Assessing the effect of empathy-enhancing interventions in health education and training: A systematic review of randomised controlled trials

|                               |                                                                                                                                                                                                                                                                                                                        |
|-------------------------------|------------------------------------------------------------------------------------------------------------------------------------------------------------------------------------------------------------------------------------------------------------------------------------------------------------------------|
| Journal:                      | <i>BMJ Open</i>                                                                                                                                                                                                                                                                                                        |
| Manuscript ID                 | bmjopen-2019-036471                                                                                                                                                                                                                                                                                                    |
| Article Type:                 | Original research                                                                                                                                                                                                                                                                                                      |
| Date Submitted by the Author: | 17-Dec-2019                                                                                                                                                                                                                                                                                                            |
| Complete List of Authors:     | Winter, Rachel; University of Leicester, Health Sciences<br>Issa, Eyad; University of Leicester, Health Sciences<br>Roberts, Nia; University of Oxford, UK, Bodleian Health Care Libraries,<br>Norman, Robert; University of Leicester, Health Sciences<br>Howick, Jeremy; University of Oxford, Faculty of Philosophy |
| Keywords:                     | MEDICAL EDUCATION & TRAINING, EDUCATION & TRAINING (see Medical Education & Training), STATISTICS & RESEARCH METHODS                                                                                                                                                                                                   |
|                               |                                                                                                                                                                                                                                                                                                                        |

SCHOLARONE™  
Manuscripts

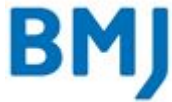

I, the Submitting Author has the right to grant and does grant on behalf of all authors of the Work (as defined in the below author licence), an exclusive licence and/or a non-exclusive licence for contributions from authors who are: i) UK Crown employees; ii) where BMJ has agreed a CC-BY licence shall apply, and/or iii) in accordance with the terms applicable for US Federal Government officers or employees acting as part of their official duties; on a worldwide, perpetual, irrevocable, royalty-free basis to BMJ Publishing Group Ltd ("BMJ") its licensees and where the relevant Journal is co-owned by BMJ to the co-owners of the Journal, to publish the Work in this journal and any other BMJ products and to exploit all rights, as set out in our [licence](#).

The Submitting Author accepts and understands that any supply made under these terms is made by BMJ to the Submitting Author unless you are acting as an employee on behalf of your employer or a postgraduate student of an affiliated institution which is paying any applicable article publishing charge ("APC") for Open Access articles. Where the Submitting Author wishes to make the Work available on an Open Access basis (and intends to pay the relevant APC), the terms of reuse of such Open Access shall be governed by a Creative Commons licence – details of these licences and which [Creative Commons](#) licence will apply to this Work are set out in our licence referred to above.

Other than as permitted in any relevant BMJ Author's Self Archiving Policies, I confirm this Work has not been accepted for publication elsewhere, is not being considered for publication elsewhere and does not duplicate material already published. I confirm all authors consent to publication of this Work and authorise the granting of this licence.

1  
2  
3 **Assessing the effect of empathy-enhancing interventions in health education and training:**  
4  
5 **A systematic review of randomised controlled trials**  
6  
7

8 **Rachel Winter (0000-0002-8775-2461), Eyad Isa, Nia Roberts, Robert I Norman, Jeremy**  
9

10 **Howick**  
11  
12  
13  
14

15 Rachel Winter  
16

17 Academic Clinical Lecturer  
18

19 College of Life Sciences, University of Leicester, George Davies Centre, Leicester, England LE1 7RH  
20  
21

22 Eyad Isa  
23

24 Academic Clinical Lecturer  
25

26 College of Life Sciences, University of Leicester, George Davies Centre, Leicester, England LE1 7RH  
27  
28

29 Robert I Norman  
30

31 Director of Learning and Teaching  
32

33 College of Life Sciences, University of Leicester, George Davies Centre, Leicester, England LE1 7RH  
34  
35

36 Dr Nia Roberts  
37

38 Librarian  
39

40 Bodleian Health Care Libraries, University of Oxford, Oxford, England  
41

42 Dr Jeremy Howick  
43

44 Director, Oxford Empathy Programme  
45

46 Faculty of Philosophy, University of Oxford, Oxford, England  
47  
48

49 **Correspondence to:** Rachel Winter [rw205@le.ac.uk](mailto:rw205@le.ac.uk), College of Life Sciences, George Davies Centre,  
50

51 University Road, Leicester, England LE1 7RH  
52  
53  
54  
55

56 Word Count: 3786  
57  
58  
59  
60

## ABSTRACT

**Objective:** To estimate the effect of empathy interventions in health education and training from randomised controlled trials (RCTs).

**Methods:** MEDLINE, PsycINFO, EMBASE, CINAHL and Cochrane databases were searched from inception to June 2019 for RCTs investigating the effect of empathy-enhancing interventions in medical and healthcare students and professionals. Studies measuring any aspect of 'clinical empathy' as a primary or secondary outcome were included. Two reviewers extracted data and assessed risk of bias of eligible studies using the Cochrane Risk of Bias Tool. Random effects meta-analyses of the impact of empathy training on participants' empathy levels were performed.

**Results:** Twenty-six trials were included, with 22 providing adequate data for meta-analysis. An overall moderate effect on participant empathy post-intervention (standardised mean difference 0.52, 95% confidence interval 0.36 to 0.67) was found. Heterogeneity across trial results was substantial ( $I^2=63\%$ ). Data on sustainability of effect was provided by 11 trials and found a moderate effect size for improved empathy up until 12 weeks (0.69 95% confidence interval 0.23 to 1.15), and a small but statistically significant effect size for sustainability at 12 weeks and beyond (standardised mean difference 0.34 95% confidence interval 0.11 to 0.57). In total 15 studies were considered to be either unclear or high risk of bias. The quality of evidence of included studies was low.

**Conclusions:** Findings suggest empathy-enhancing interventions can be effective at cultivating and sustaining empathy with intervention specifics contributing to effectiveness. This review focuses on an important, growing area of medical education, and provides guidance to those looking to develop effective interventions to enhance empathy in the

1  
2  
3 healthcare setting. Further high quality trials are needed that include patient-led outcome  
4  
5 assessments and further evaluate the long-term sustainability of empathy training.  
6  
7

8 **Protocol registration:** PROSPERO registration number (CRD42019126843).  
9  
10

### 11 12 13 **Strengths and limitations of this study** 14

- 15  
16  
17 • This is an up-to-date review that excludes non-randomised studies, follows a pre-  
18  
19 published protocol, and measures the longer term effects of empathy training.  
20  
21
- 22  
23 • The quality of the review was limited by the reporting quality of some of the  
24  
25 included studies.  
26  
27
- 28  
29 • The studies in our review were heterogeneous, which we anticipated.  
30  
31
- 32  
33 • We found only four studies that followed-up participants for at least three months,  
34  
35

## 36 **INTRODUCTION** 37

### 38 **Rationale** 39

40  
41 Clinical empathy has multiple benefits for patient care[1-4] and practitioner health.[5, 6]  
42  
43 Indeed, person-centred and empathic care are central to all professional healthcare  
44  
45 education.[7] Empathy in the clinical setting has been defined in various ways[8] and can be  
46  
47 considered as a multidimensional construct incorporating affective, cognitive, behavioural  
48  
49 and moral components.[9] A widely accepted definition of clinical empathy involves the  
50  
51 ability to understand the patient's situation, perspective and feelings, communicate that  
52  
53 understanding to them, and act on it in a helpful and therapeutic way.[10] Although  
54  
55 contested by some,[11,12] there is evidence that empathy in medical and health science  
56  
57  
58  
59  
60

1  
2  
3 students declines during undergraduate education.[13-15] Researchers also agree that  
4  
5 empathetic skills can be taught.[16-19] Despite this, no standard empathy-curriculum for  
6  
7 healthcare training exists and empathy-based training does not appear routinely in medical  
8  
9 or healthcare education.[13]  
10  
11  
12  
13  
14

15 Three systematic reviews of empathy-promoting interventions have been  
16  
17 conducted.[16,19,20] Kelm et al[16] conducted a qualitative synthesis of empathy-  
18  
19 cultivating interventions for medical students or physicians. Their findings support the  
20  
21 hypothesis that interventions can increase physician and medical student empathy.  
22  
23 However, they also identified a lack of rigorous study design in most studies (such as lack of  
24  
25 control groups and a failure to use random assignment). More recently, Vassilios et al[19]  
26  
27 published a systematic review of randomised control trials (RCTs) of empathy-promoting  
28  
29 interventions for health professionals. However, only two out of 17 included reported  
30  
31 change in empathy as a primary outcome, focusing instead on general communication skills.  
32  
33 Hence, the review did not provide robust evidence of empathy-enhancing interventions. In  
34  
35 2019, Patel et al[20] reviewed educational interventions aimed at enhancing both empathy  
36  
37 and/or compassion. They included observational as well as randomised studies and looked  
38  
39 only at physicians and physicians-in-training. They were not able to pool their results  
40  
41 statistically and did not investigate whether potential benefits of empathy were sustained  
42  
43 over time.  
44  
45  
46  
47  
48  
49  
50  
51  
52  
53

54 The problems listed above present barriers for medical educators looking to implement  
55  
56 empathy training into their curriculum. It is not currently known how large the effect size of  
57  
58 effective empathy training is; whether the effect is sustained over time; or how best to train  
59  
60

1  
2  
3 students and continuing learners. It is important to measure the effect of empathy training  
4  
5 over time, because such an effect could increase rather than decrease. Arthur et al. [21]  
6  
7 found no effect of empathy training immediately after the training, but significant  
8  
9 improvement 12 weeks after the end of the training. A delayed improvement in empathy  
10  
11 could potentially be accounted for by participants only recognising the benefits of training  
12  
13 once they are putting any lessons learnt into action.  
14  
15  
16  
17  
18  
19

20 In this systematic review and meta-analysis we addressed these gaps, with an up-to-date  
21  
22 synthesis of RCTs of interventions aimed at promoting empathy, delivered to both medical  
23  
24 and healthcare students and professionals.  
25  
26  
27  
28  
29

### 30 **Objectives**

31  
32 The overarching objective of this systematic review and meta-analysis is to combine data  
33  
34 from all available randomised controlled trials of empathy-enhancing educational  
35  
36 interventions in health education and training. This was achieved with two subsidiary  
37  
38 objectives:  
39  
40

- 41 (1) to assess the effectiveness of interventions aiming to enhance empathy in  
42  
43 undergraduate and postgraduate health education and training; and  
44  
45
- 46 (2) to assess any lasting effect of empathy training.  
47  
48

49 We also had three secondary aims:

- 50 (1) to identify the intervention type (e.g. communication skills training) that is most  
51  
52 effective at enhancing empathy;  
53  
54
- 55 (2) to identify the duration of training that is most effective; and  
56  
57  
58  
59  
60



1  
2  
3 (3) to identify the tools used to measure empathy levels in participants and therefore  
4  
5 the effectiveness of the intervention.  
6  
7  
8  
9

## 10 **METHODS**

### 11 **Protocol and registration**

12  
13 In accordance with the Cochrane Handbook for systematic reviews of interventions,[22] we  
14  
15 published a protocol for this systematic review,[23] registered with PROSPERO international  
16  
17 prospective register of systematic reviews (registration number CRD42019126843). We  
18  
19 followed the Preferred Reporting Items for Systematic Reviews and Meta-Analyses  
20  
21 (PRISMA) guidelines.[24]  
22  
23  
24  
25  
26  
27  
28  
29

### 30 **Eligibility criteria**

31  
32 Randomised controlled trials (RCTs), including cluster RCTs, which investigated the effect of  
33  
34 empathy-enhancing interventions on medical and other healthcare students and  
35  
36 professionals' empathy levels as a primary or secondary outcome were eligible for inclusion.  
37  
38 We included studies with students and trainees at any level and qualified practitioners from  
39  
40 any medical profession (including medicine, dentistry, nursing, pharmacy, midwifery and  
41  
42 allied healthcare professions). Studies measuring any aspect of 'clinical empathy' were  
43  
44 eligible for inclusion. In addition, terminology and measures used in each study were  
45  
46 assessed to ensure that outcomes reported under different terms but using the same  
47  
48 definitions (for example, reporting on compassion taken to mean empathy) would be  
49  
50 captured. Empathy scores reported via self- and/or observer-reported outcome measures  
51  
52 post-intervention were included.  
53  
54  
55  
56  
57  
58  
59  
60

## Information sources and search strategies

The following databases were searched from inception to 6 June 2019: MEDLINE, PsycINFO, EMBASE, CINAHL and Cochrane. Search strategies are detailed within eTable 1 in the Supplement. Electronic searches were supplemented by hand-searching the references of retrieved papers.

## Study selection

All studies retrieved through the search strategy were stored using EndNote with duplicates removed. Two authors (RW and EI) reviewed all titles and abstracts to identify those that met the inclusion criteria. Full text manuscripts were retrieved for potentially relevant articles, the reference lists of which were also hand-searched for further potential studies. If the decision to include or exclude a study was unclear, the study was discussed with a third author (JH) to reach a consensus. Seven papers were discussed with the third author. A PRISMA flow chart was used to record the screening and selection process.

## Data collection

One reviewer (RW) extracted, summarised and recorded data to assess quality and to synthesise evidence from included studies. A second author independently extracted a random sample (10%) of studies to ensure agreement on the information extracted and summarised (JH). Data was extracted about: general demographics of the study (first author, date published, country of origin, whether empathy is defined); study design (participants and recruitment, inclusion/exclusion criteria, study duration, control conditions); description of the intervention (setting, duration and frequency); outcome

1  
2  
3 measures (type of measure, whether measure is validated); results (sample size,  
4  
5 completeness of outcome data, data that can be used to calculate an effect size); risk of bias  
6  
7 and funding source. If data was not reported, study authors were contacted.  
8  
9

### 10 11 12 13 14 **Risk of bias in individual studies**

15  
16  
17 Risk of bias was assessed using the Cochrane Collaboration's Tool for assessing the risk of  
18 bias in clinical trials. This recommends the explicit reporting of each individual element of an  
19 RCT: random sequence generation and allocation concealment (selection bias); blinding of  
20 participants and blinding of outcome assessment (detection bias); incomplete outcome data  
21 (attrition bias); and selective reporting (reporting bias). Using the criteria provided by  
22 Higgins (2011)[22], each item was scored as high, low or unclear risk of bias, and evidence  
23 from the study was used to justify each score given. For cluster RCTs, an additional domain  
24 was assessed: selective recruitment of cluster participants. Given that evidence increasingly  
25 suggests that sequence generation and allocation concealment are of particular importance  
26 in determining the overall risk of bias,[22] a study was classed as being at high risk of bias if  
27 it scored as high or unclear risk on either of these domains.  
28  
29  
30  
31  
32  
33  
34  
35  
36  
37  
38  
39  
40  
41  
42  
43  
44  
45

### 46 **Synthesis of results**

47  
48  
49 We calculated the overall effect size of empathy interventions using the standardised mean  
50 difference (SMD) and 95% confidence intervals (CI) based on the data provided in the  
51 studies: post-intervention sample size, mean and standard deviation (SD) for experimental  
52 versus control group (except where only mean difference and SD between pre- and post-  
53 intervention for the experimental and control groups were provided). We used a random  
54  
55  
56  
57  
58  
59  
60

1  
2  
3 effects model (REM) to allow for likely different (though related) intervention effects. If a  
4  
5 study had more than one intervention arm, we used the results for the most comprehensive  
6  
7 training intervention. If a study provided measures of empathy using different scales, the  
8  
9 primary outcome measure of empathy was used. If it was unclear which was the primary  
10  
11 outcome measure, we used the first reported measure of empathy.  
12  
13  
14  
15  
16  
17

18 Heterogeneity was anticipated between studies and assessed using Cochran's Q Statistic  
19  
20 (statistically significant for  $p < 0.01$ ) and quantified using the  $I^2$  statistic, with an  $I^2$  value of 50%  
21  
22 or more being considered to represent levels of heterogeneity.  
23  
24  
25  
26  
27

28 Primary analysis included all studies providing the data needed to calculate the mean and  
29  
30 SD (or standard error (SE)) of the post-intervention control and intervention groups. Where  
31  
32 studies provided more than one point for outcome assessment, the data closest to the end-  
33  
34 point of the intervention was used. Studies that provided no numerical data on empathy-  
35  
36 related outcomes or data from which it was not possible to calculate mean values and SD  
37  
38 were excluded from the meta-analysis.  
39  
40  
41  
42  
43  
44  
45

#### 46 **Additional analyses**

47  
48  
49 We performed a sensitivity analysis excluding studies that were considered to be at high risk  
50  
51 of bias (scoring unclear or high risk of bias for either sequence generation or allocation  
52  
53 concealment, with evidence suggesting these domains are of particular importance in  
54  
55 establishing risk of bias).[22]  
56  
57  
58  
59  
60

1  
2  
3 We conducted separate meta-analyses to look at: sustainability of the effects of the  
4  
5 intervention; the intervention type that is most effective; the duration of intervention that  
6  
7 is most effective; the outcome assessment tools (comparing objective and subjective  
8  
9 outcome measures); and participant populations (effectiveness of interventions aimed at  
10  
11 student populations compared with those aimed at professional populations). To assess for  
12  
13 sustainability, studies that provided follow-up measurements of the impact of an empathy  
14  
15 intervention were grouped into measurements taken before 12 weeks, and at 12 weeks or  
16  
17 later. To evaluate the type of intervention most effective at cultivating empathy, we divided  
18  
19 interventions into communication skills-based training interventions, perspective-taking  
20  
21 interventions, empathy skills-based training, psychotherapy-focused training, arts and  
22  
23 humanities-focused interventions, stress management-focused training, serious gaming  
24  
25 interventions, and mixed educational programmes. Interventions were categorised based  
26  
27 on the descriptions given of the training programmes in each individual study. Where an  
28  
29 intervention could not be put into one or other category, it was allocated to the 'mixed  
30  
31 educational programme' category. To assess impact of duration on cultivating empathy,  
32  
33 interventions were divided on the basis of the length of time participants spent engaging  
34  
35 with the intervention.  
36  
37  
38  
39  
40  
41  
42  
43  
44  
45  
46  
47

### 48 **Risk of bias across studies**

49  
50  
51 Reporting bias was assessed qualitatively based on inspection of the characteristics of the  
52  
53 studies included. A funnel plot was produced to investigate small study effects, which may  
54  
55 indicate the presence of publication bias. The GRADE system was used to evaluate the  
56  
57 overall quality of evidence for the primary outcome.[25]  
58  
59  
60

## RESULTS

### Study selection

The literature search resulted in 4,904 citations with duplicates removed. Figure 1 provides an overview of the selection process (see eResults in the Supplement for further details). Seventy-two articles were retrieved for full-text review. Forty-six studies were excluded (eTable 2 in the Supplement). Twenty-six trials were included.[25-50] (n=2,900) Table 1 provides a summary of characteristics (eTable 3 in the Supplement gives further details).

Table 1. Summary of characteristics of included studies

| Study           | Year | County    | No. participants | Participant type                        | Intervention type             | Duration of intervention (hours) | Outcome assessor | Outcome measure | Effect of intervention                                            |
|-----------------|------|-----------|------------------|-----------------------------------------|-------------------------------|----------------------------------|------------------|-----------------|-------------------------------------------------------------------|
| Alhassan        | 2019 | Ghana     | 210              | Nursing and midwifery students          | Communication skills training | 12                               | Self             | JSE             | No significant effect found                                       |
| Arthur          | 2017 | UK        | 112              | Health care assistants                  | Perspective-taking training   | 12                               | Self             | JSE             | No significant effect found                                       |
| Blair Irvine    | 2012 | USA       | 172              | Health care professionals               | Mixed                         | 4                                | Self             | VST             | Significant effect found                                          |
| Buffel Du Vaure | 2017 | France    | 352              | Medical students                        | Balint group                  | 10.5                             | Self Observer    | JSE CARE        | Mixed. No significant effect for JSE, significant effect for CARE |
| Butow           | 2007 | Australia | 30               | Physicians                              | Communication skills training | 15                               | Observer         | CRP             | No significant effect found                                       |
| Collins         | 2017 | USA       | 25               | Student pharmacists                     | Literature intervention       | 2                                | Self             | JSE             | No significant effect found                                       |
| Daniels         | 1998 | Canada    | 53               | Nursing students                        | Communication skills training | 18                               | Self Self        | ECRS CIC        | Significant effect found                                          |
| Foster          | 2016 | USA       | 70               | Medical students                        | Communication skills training | NE                               | Observer         | ECCS            | Significant effect found                                          |
| Gholamzadeh     | 2018 | Iran      | 63               | Nursing students                        | Empathy skills training       | 8                                | Self             | JSE             |                                                                   |
| Gould           | 2017 | UK        | 249              | Nursing staff and healthcare assistants | Mixed                         | NE                               | Self             | JSE             | No significant effect found                                       |

|                    |      |                    |     |                            |                                 |      |                  |                             |                                                                                        |
|--------------------|------|--------------------|-----|----------------------------|---------------------------------|------|------------------|-----------------------------|----------------------------------------------------------------------------------------|
| <b>Hastings</b>    | 2018 | UK                 | 236 | Qualified care staff       | Mixed                           | 3    | Self             | SECBQ                       | No significant effect found                                                            |
| <b>Hattink</b>     | 2015 | Netherlands and UK | 142 | Qualified care staff       | Mixed                           | NE   | Self             | IRI                         | Significant effect found                                                               |
| <b>Larti</b>       | 2014 | Iran               | 82  | Nursing students           | Communication skills training   | 12   | Self             | JSE                         | Significant effect found                                                               |
| <b>Lobchuck</b>    | 2018 | Canada             | 44  | Nursing staff and students | Perspective-taking training     | 2.66 | Observer<br>Self | CARE<br>CARE (modified)     | Mixed. No significant effect found for CARE. Significant effect found on modified CARE |
| <b>Lor</b>         | 2014 | USA                | 40  | Student pharmacists        | Perspective-taking training     | 18   | Self             | JSE                         | Significant effect found                                                               |
| <b>LoSasso</b>     | 2017 | USA                | 70  | Medical students           | Communication skills training   | 1    | Self             | JSE                         | No significant effect found                                                            |
| <b>Mueller</b>     | 2001 | USA                | 37  | Physical therapy students  | Mixed                           | 11   | Self             | JSE                         | Significant effect found                                                               |
| <b>Reiss</b>       | 2012 | USA                | 99  | Physicians                 | Empathy skills training         | 4    | Observer<br>Self | CARE<br>JSE<br>BEES<br>EFDT | Mixed. No significant effect found for CARE, JSE, BEES. Significant effect for EFDT    |
| <b>Shapiro</b>     | 1998 | USA                | 78  | Medical students           | Mindfulness training            | 17.5 | Self             | ECRS                        | Significant effect found                                                               |
| <b>Sripada</b>     | 2010 | USA                | 12  | Physicians                 | Psychotherapy intervention      | NE   | Observer         | BLRI                        | Significant effect found                                                               |
| <b>Sterkenburg</b> | 2018 | Netherlands        | 224 | Qualified care staff       | Serious game                    | 0.33 | Self             | SQ                          | Significant effect found                                                               |
| <b>Tulsky</b>      | 2011 | USA                | 48  | Physicians                 | Communication skills training   | NE   | Observer         | ES<br>EO<br>PE              | Significant effect found                                                               |
| <b>Vaghee</b>      | 2018 | Iran               | 127 | Nursing students           | Perspective-taking training     | 3    | Self             | JSE                         | Significant effect found                                                               |
| <b>Wolf</b>        | 1987 | Canada             | 134 | Medical students           | Communication skills training   | 12   | Self             | HRI<br>MCI                  | Significant effect found                                                               |
| <b>Wundrich</b>    | 2017 | Germany            | 158 | Medical students           | Empathy skills training         | 6    | Self<br>Observer | JSE<br>OSCE                 | Mixed. No significant effect found for JSE. Significant effect found on OSCE scores    |
| <b>Yang</b>        | 2018 | China              | 177 | Nursing students           | Narrative medicine intervention | 42   | Self             | JSE                         | Significant effect found                                                               |

## Study characteristics

Study publication dates ranged from 1987 to 2019, with 15 out of 26 trials published in the last five years.[21,26,28,30,32-36,38,40,45,47,49,50] Thirteen were carried out in the USA and Canada,[27,30-32,38-41,43,44,46,48] seven in Europe,[21,28,34-36,45,49] three in Iran,[33,37,47] and one each in Australia,[29] Ghana[26] and China.[50] Fourteen studies provided a definition of empathy.[28,30,32-35,38,41-45,49,50]

## Study design

Sample size ranged from 12 to 352 participants (median of 90.5; interquartile range (IQR) 49.25-154). Twelve studies had 100 or more participants.[21,26-27,34-36,45,47-49] Seven had fewer than 50 participants.[29,30,38,39,41,44,46] Fifteen studies evaluated empathy interventions for student populations,[26,28,30-33,37,39,40,41,43,47-50] including seven which looked at medical students,[28,32,33,40,43,48,49] five with nursing students,[31,37,38,48,50] two with student pharmacists,[30,39] one with physiotherapy students,[41] and one with a mixed nursing and midwifery student population.[26] Ten trials used professional/qualified populations,[21,27,29,34-36,42,44-46] with four of these focusing on physicians,[29,42,44,46] one on nurses,[34] and five with qualified care staff, including healthcare assistants.[21,27,35,36,45] One study used a mixed student and professional population (nursing students and nurse practitioners).[38]

Five trials used multiple sites,[21,28,34,35,38] and five were cluster RCTs.[21,34,35,47,50]

Ten studies defined both inclusion and exclusion criteria for the study.[21,26-27,33,35,37,39,47,50] Thirteen defined inclusion criteria only[28-31,34,36,38,40,41,43-



1  
2  
3 45,48] and in three studies inclusion/exclusion criteria were either not given or were not  
4  
5 clear.[32,46,49]  
6  
7  
8  
9

## 10 **Study interventions**

11  
12  
13  
14 While the aims of eligible trials in this review were to enhance empathy through an  
15  
16 educational intervention, a range of intervention types were employed. The most  
17  
18 commonly used approach was a communication skills-based training intervention, with  
19  
20 eight[26,29,31,32,37,40,46,48] studies using this. Four studies used perspective-taking  
21  
22 training,[21,38,39,47] two used interventions with a psychotherapy focus,[28,44] three used  
23  
24 empathy skills-based training sessions,[33,42,49] two used an arts and humanities  
25  
26 approach,[30,50] one used mindfulness-based training,[43] and one a serious gaming  
27  
28 intervention.[45] Five studies could not be classified and were described as 'mixed'  
29  
30 interventions, using various elements of theoretical knowledge teaching and experiential  
31  
32 learning sessions.[27,34-36,41] Seventeen of the 26 interventions had been specifically  
33  
34 designed to foster empathy[21,30,32-35,37-42,44-46,49,50] while the remaining studies  
35  
36 used interventions not specifically designed to improve empathy but with the hypothesis  
37  
38 that they would. For example, Buffel Du Vaure et al[28] explored the impact of a  
39  
40 psychotherapy-focused 'Balint Group' intervention on medical student empathy.  
41  
42  
43  
44  
45  
46  
47  
48

49 The most frequently used mode of delivery was face-to-face, with eighteen interventions  
50  
51 delivered this way.[21,26,28,29,31,33-35,38-40,42,43,44,47-50] Six interventions were  
52  
53 delivered online,[27,32,36,37,41,45] one employed a self-directed mode of delivery,[30] and  
54  
55 one used a CD-ROM to deliver the intervention.[46]  
56  
57  
58  
59  
60

1  
2  
3 Studies ranged in duration of intervention (total time spent participating in the intervention)  
4  
5 from 20 minutes to 18 hours. The mean duration was 10.2 hours (SD 8.8). Five studies did  
6  
7 not explicitly state duration.[32,34,36,44,46] Training packages in six studies were  
8  
9 considered to be 'short duration', lasting three hours or less;[30,35,38,40,45,47] ten were  
10  
11 considered 'medium duration', lasting between four and 12 hours;[21,26-  
12  
13 28,33,37,41,42,48,49] and five were considered 'long duration', lasting more than 12  
14  
15 hours.[29,31,39,43,50]  
16  
17  
18 Timespan of the interventions ranged from one to 120 days, with a mean length of 38.5  
19  
20  
21 days (SD 40.2).  
22  
23  
24  
25  
26  
27  
28  
29

### 30 **Outcome measures**

31  
32  
33 Studies used either self-report or other (objective)-report measures to assess a change in  
34  
35 participants' empathy. Objective measures included those completed by patients or experts  
36  
37 (for example faculty staff or trained actors playing simulated patients). The majority of  
38  
39 studies (18) used only self-report measures.[21,26,27,30,31,33-37,39-41,43,45,46-48,50]  
40  
41  
42 Four studies used objective measures[29,32,44,46] (of which only Tulsky et al[46] used  
43  
44 patients rather than simulated patients or experts as the outcome assessors). Four studies  
45  
46 used a combination of self- and objective-report tools to measure empathy.[28,38,42,49]  
47  
48  
49  
50  
51 The Jefferson Scale of Empathy (JSE)[51] or a version of it was the most frequently used self-  
52  
53 reported outcome measurement tool, with 13 studies employing  
54  
55 it.[21,26,27,30,33,34,37,39-41,47,49,50] Other self-report tools used included the Balanced  
56  
57 Emotional Empathy Scale (BEES),[52] the Ekman Facial Decoding test,[53] and the Toronto  
58  
59  
60

1  
2  
3 Empathy Questionnaire (TEQ).[54] The Consultation and Relational Empathy Scale  
4  
5 (CARE)[55] was the most frequently used objective measure of empathy, with three studies  
6  
7 employing it.[28,38,42] Other objective outcome measures of empathy included the  
8  
9 Carkhuff Empathy Rating Scale.[56] In addition, some studies developed their own measures  
10  
11 of empathy, for example Tulksy et al[46] used a Likert scale with ten items to assess  
12  
13 perceived oncologist empathy. Butow et al[29] created a manual to code transcripts of  
14  
15 videoed patient interactions to assess empathic behaviour, in addition to using the CARE  
16  
17 scale.[55] All studies except three[27,29,46] employed a validated tool to measure empathy.  
18  
19  
20  
21  
22  
23  
24  
25

### 26 **Outcome assessment strategy**

27  
28  
29 Timeframes for measuring outcomes varied across studies. Fifteen studies did not specify a  
30  
31 timeframe for post-intervention measurements or were unclear.[31-33,35,36-38,40,41,43-  
32  
33 46,47-50] For example, Hastings et al[35] reported measuring empathy six-weeks post-  
34  
35 randomisation but were not clear how long after the intervention had ended that this  
36  
37 measurement was taken. For studies that were explicit, post-intervention measures varied  
38  
39 between two days and six months, with the majority of measures taken within two weeks of  
40  
41 the intervention.[21,26,28,39,46,27,30] Eleven studies measured the effects of the  
42  
43 intervention at one or more follow-up points (in addition to the post-intervention  
44  
45 measurement),[21,26,27,29,31,33,35,37,39,47,50] which varied between four weeks and 18  
46  
47  
48  
49  
50  
51  
52 months.  
53  
54  
55  
56  
57

### 58 **Risk of bias within studies**

1  
2  
3 In total, 11 studies[21,26,29,34-37,41,42,45,46] were considered to be at low risk of bias  
4  
5 overall (with a low risk of bias for sequence generation and allocation concealment).[22]  
6  
7

8 Thirteen studies were considered to be low risk for random sequence  
9  
10 generation[21,26,29,33-38,41,45,46] and 11 were low risk for allocation  
11  
12 concealment.[21,26,29,34-37,41,42,45,46] Blinding was not possible in the majority of  
13  
14 studies due to the nature of the interventions and the outcome assessment (self-report)  
15  
16 strategy frequently employed. Full details of the risk of bias assessment are reported in the  
17  
18 eResults of the Supplement and eFigure 1 illustrates the overall findings.  
19  
20  
21  
22  
23  
24  
25

## 26 **Results of individual studies**

27  
28  
29

30 The majority of studies (19/26) found that the tested intervention significantly improved  
31  
32 empathy on at least one outcome measure.[27,28,31-33,36-39,41-50] Seven studies did not  
33  
34 find any significant increase in empathy.[21,26,29,30,34,35,40] Of the studies that reported  
35  
36 a significant improvement in empathy on at least one outcome measure, 11 were aimed at  
37  
38 student populations (representing approximately 73% of student population studies)[28,31-  
39  
40 33,39,41,43,47-50] and seven were aimed at professionals (representing 70% of professional  
41  
42 population studies).[27,36,37,44,45,46,42] Fifteen studies reported a significant  
43  
44 improvement in empathy using a self-rated outcome measure (this represents 68% of  
45  
46 studies (15/22) using a self-report outcome tool).[27,28,31,33,36-39,41,43-45,47,48,50]  
47  
48  
49

50  
51  
52 Four studies reported an increase in empathy when using an objective measure  
53  
54 (representing 50% (4/8) of studies using an objective outcome measure).[32,42,46,49]  
55

56  
57 Seventeen studies employed an educational intervention that had been specifically  
58  
59 designed to foster empathy.[21,30,32-35,37-42,44-46,49,50] Of these, 12 (70%) were  
60

1  
2  
3 successful.[32,33,37-42,44-46,49,50] Four out of five studies that were classed as 'long  
4 duration' (lasting >12 hours) reported a significant improvement in empathy post  
5 intervention;[31,39,43,50] 50% of 'medium duration' studies (between 3 and 12 hours)  
6 reported a significant increase in empathy;[27,33,37,48,49] and 33% of 'short duration'  
7 studies (<3 hours) reported a significant improvement.[45,47]  
8  
9  
10  
11  
12  
13  
14  
15  
16  
17  
18

### 19 **Synthesis of results**

20  
21  
22 Of the 26 studies included in this review, four were excluded from meta-analysis as they did  
23 not provide adequate data from which to calculate the SMD and SD.[29,34,44,49] For the  
24 studies that were excluded from the primary analysis, Butow et al[29] reported a positive  
25 but not statistically significant effect and Gould et al[34] found no significant difference  
26 between control and intervention groups. Wundrich[49] reported no significant influence of  
27 the intervention as measured by the JSE (student version) but did report a positive and  
28 statistically significant effect on the observer-assessed outcome. Sripada et al[44] also  
29 reported a statistically significant positive effect. Of the 22 studies that had adequate data  
30 for pooling, all but one (Arthur et al[21]) showed a benefit of intervention. The primary  
31 analysis identified that the overall effect of empathy interventions in terms of improving  
32 participant empathy was statistically significant (SMD 0.52, 95% CI 0.36 to 0.67) (figure 2).  
33  
34  
35  
36  
37  
38  
39  
40  
41  
42  
43  
44  
45  
46  
47  
48  
49  
50  
51  
52  
53  
54  
55  
56  
57  
58  
59  
60

The Q value indicated significant heterogeneity, with p equal to 0.0001 and  $I^2$  equal to 63%.  
A summary of findings is presented in table 2.

Table 2. Summary of effect sizes for studies included in meta-analyses

|                                                | Standardised mean difference (95% confidence interval) | Heterogeneity (I <sup>2</sup> ) | References                          |
|------------------------------------------------|--------------------------------------------------------|---------------------------------|-------------------------------------|
| Overall effect of empathy interventions        | 0.52 (0.36-0.67)                                       | 63%                             | 21,26-28,30-33,35-43,45-48,50       |
| Effect of intervention with least risk of bias | 0.44 (0.19-0.69)                                       | 66%                             | 21,26,35-37,41,42,45,46             |
| Sustainability of effect                       |                                                        |                                 |                                     |
| - Follow-up measurement before 12 weeks        | 0.69 (0.23-1.15)                                       | 84%                             | 26,27,33,35,37,47                   |
| - Follow-up measurement at 12 weeks or later   | 0.34 (0.11-0.57)                                       | 0%                              | 21,35,39,50                         |
| Effect by type of intervention                 |                                                        |                                 |                                     |
| - Communication skills training                | 0.69 (0.32-1.06)                                       | 78%                             | 26,31,32,37,40,46,48                |
| - Perspective-taking training                  | 0.60 (0.17-1.04)                                       | 55%                             | 21,38,39,47                         |
| - Mixed educational programmes                 | 0.39 (0.18-0.61)                                       | 0%                              | 27,35,36,41                         |
| - Empathy skills training                      | 0.60 (-0.02-1.21)                                      | 71%                             | 33,42                               |
| - Arts/humanities interventions                | 0.38 (0.03-0.73)                                       | 0%                              | 30,50                               |
| Effect by duration of intervention             |                                                        |                                 |                                     |
| - Short (3 hours or less)                      | 0.44 (0.25-0.63)                                       | 23%                             | 30,35,38,40,45,47                   |
| - Medium (4 to 12 hours)                       | 0.46 (0.15-0.77)                                       | 82%                             | 21,26,27,28,33,37,41,42,48          |
| - Long (more than 12 hours)                    | 0.57 (0.32-0.82)                                       | 0%                              | 31,39,43,50                         |
| Effect by participant population               |                                                        |                                 |                                     |
| - Student population                           | 0.62 (0.38-0.85)                                       | 74%                             | 26,28,30-33,37-41,43,47,48,50       |
| - Professional/qualified population            | 0.33 (0.18-0.47)                                       | 0%                              | 21,27,35,36,42,45,46                |
| Effect by outcome assessor                     |                                                        |                                 |                                     |
| - Self-assessment                              | 0.52 (0.37-0.68)                                       | 58%                             | 21,26-28,30,31,33,35-43,45,47,48,50 |
| - Observer-assessment                          | 0.28 (-0.18-0.75)                                      | 81%                             | 28,32,38,42,46                      |

## Additional analyses

### Sensitivity analysis

For the sensitivity analysis of the least biased studies (table 2), 11 were judged to have low risk of bias for random allocation or allocation concealment[21,26,29,34-37,41,42,45,46] and nine of these provided sufficient data to be included in a meta-analysis (figure 3).[21,26,35-37,41,42,45,46]

### Sustainability of improved empathy analysis

Eleven studies provided follow-up data assessing sustainability of changes to empathy, in addition to post-intervention measurement.[21,26,27,29,31,33,35,37,39,47,50] Eight were eligible for inclusion in a sub-group analysis (see eResults in the Supplement for further details).[21,27,33,35,37,39,47,50] Meta-analysis found a moderate effect size for improved

1  
2  
3 empathy until 12 weeks and a small but statistically significant effect size for sustainability  
4  
5  
6 at 12 weeks and later (figure 4 and table 2).  
7  
8

#### 9 Type of intervention analysis 10

11  
12 A meta-analysis comparing sub-groups of different types of intervention (eFigure 2 in the  
13 Supplement and eResults for further details) found the greatest effect was with empathy  
14  
15  
16  
17 training that was communication skills-based (table 2). The smallest effect reported was for  
18  
19  
20 interventions that were described as 'mixed educational programmes' and ones based in  
21  
22  
23 the arts and humanities (table 2).  
24  
25

#### 26 Duration of intervention analysis 27

28  
29  
30 Interventions of medium and longer duration (eFigure 3 in the Supplement) were most  
31  
32  
33 effective. Interventions of short duration had the smallest effect size (table 2).  
34  
35

#### 36 Participant population analysis 37

38  
39  
40 Studies using healthcare student participant populations appeared to have a larger effect  
41  
42  
43 size than those directed at professional/qualified participant populations (eFigure 4 in the  
44 Supplement). Studies included in a sub-analysis of interventions for students showed a  
45  
46  
47 moderate effect size of training, compared to a smaller but still significant effect size for  
48  
49  
50 training directed at professional/qualified populations (table 2).  
51  
52

#### 53 Outcome assessor analysis 54

55  
56  
57 Studies using a self-assessment outcome scale showed a moderate and significant benefit to  
58  
59  
60 empathy for the intervention tested (eFigure 5), compared to a small and statistically not

1  
2  
3 significant effect size for the observer-assessed outcome studies (table 2).  
4  
5  
6  
7  
8

### 9 **Risk of bias across studies**

10  
11  
12 A funnel plot of trials used in the primary meta-analysis (22 studies) did not reveal evidence  
13 of publication bias (figure 5). An evaluation of evidence using GRADE software found that  
14  
15 the quality of evidence was low (eTable 4). This was due to a high or uncertain risk of bias  
16  
17 based on random sequence generation and/or allocation concealment in a number of  
18  
19 studies and a high degree of heterogeneity across studies.  
20  
21  
22  
23  
24  
25  
26  
27  
28  
29  
30  
31  
32  
33  
34  
35  
36  
37  
38  
39  
40  
41  
42  
43  
44  
45  
46  
47  
48  
49  
50  
51  
52  
53  
54  
55  
56  
57  
58  
59  
60



## DISCUSSION

### Summary of evidence

We found that empathy interventions delivered to healthcare students and practitioners consistently improved empathy levels in participants by a moderate amount, and that this effect was sustained over time. The quality of the evidence was low due to lack of blinding and allocation concealment.

### Comparison with other evidence

Other systematic reviews have found benefits of empathy training[16,19,20] and that practitioner empathy training makes a difference to patients.[57] Our study adds to this evidence by providing an estimate of empathy training from higher quality (randomised) trials, and by showing that the effect lasts well beyond the intervention.

### Strengths and limitations

This is an up-to-date review that excludes non-randomised studies, follows a pre-published protocol, and measures the longer term effects of empathy training. The quality of the review was limited by the reporting quality of some of the included studies. In studies where it was unclear which was the primary measure of empathy, we choose to use the first reported measure of empathy. This might have been biased, as authors may have chosen to report the most positive outcome first. However, we found that this was not necessarily the

1  
2  
3 case. For example, the first outcome reported by Buffel du Vaure et al [28] (who did not  
4  
5 specify which was primary) had a smaller effect than the second.  
6  
7

8  
9 The studies in our review were also heterogeneous, which we anticipated. Finally, we only  
10  
11 found four studies that followed participants for at least three months. However, the ones  
12  
13 that did do so found a positive effect.  
14  
15

### 16 17 18 19 20 **Implications for research and practice**

21  
22  
23 An area for future research highlighted through this review is the lack of more objective,  
24  
25 patient-evaluated empathy interventions. The results of this review have implications for  
26  
27 practice and may be useful to those involved in education and training. With competition  
28  
29 for time and space in both undergraduate and postgraduate healthcare curriculums, robust  
30  
31 evidence when considering how best to develop effective interventions to improve empathy  
32  
33 in students and practitioners and ultimately to improve patient care is vital.  
34  
35  
36  
37  
38  
39  
40  
41

### 42 **CONCLUSION**

43  
44  
45 Empathy-enhancing interventions for healthcare students and professionals can be effective  
46  
47 at cultivating and sustaining empathy. Designers of future trials of empathy training for  
48  
49 medical students can use the results of this review as a guide to their intervention  
50  
51 development.  
52  
53  
54  
55  
56  
57  
58  
59  
60

1  
2  
3 The Corresponding Author has the right to grant on behalf of all authors and does grant on  
4  
5 behalf of all authors, an exclusive licence (or non exclusive for government employees) on a  
6  
7 worldwide basis to the BMJ Publishing Group Ltd to permit this article (if accepted) to be  
8  
9 published in BMJ editions and any other BMJPGJ products and sublicences such use and  
10  
11 exploit all subsidiary rights, as set out in our licence.  
12  
13  
14  
15

### 16 **CONTRIBUTORSHIP STATEMENT**

17  
18  
19  
20 RW had a lead role in the planning, conduct and reporting of the work described in this  
21  
22 article. EI had an equal role in the conduct of the work described in this article. NR had an  
23  
24 equal role in the conduct of the work described. RI had a supporting role in the planning and  
25  
26 reporting of the work described in this article. JW had an equal role in the planning, conduct  
27  
28 and reporting of the work described in this article. The corresponding author attests that all  
29  
30 listed authors meet authorship criteria and that no others meeting the criteria have been  
31  
32 omitted.  
33  
34  
35  
36  
37

### 38 **COMPETING INTEREST STATEMENT**

39  
40  
41  
42 All authors have completed the Unified Competing Interest form and declare: no support  
43  
44 from any organisation for the submitted work; no financial relationships with any  
45  
46 organisations that might have an interest in the submitted work in the previous three years,  
47  
48 no other relationships or activities that could appear to have influenced the submitted  
49  
50 work.  
51  
52  
53  
54

### 55 **TRANSPARENCY DECLARATION**

1  
2  
3 This manuscript is an honest, accurate and transparent account of the studies being  
4  
5 reported. No important aspects of the review have been omitted.  
6  
7

#### 8 9 **ETHICAL APPROVAL**

10  
11  
12  
13 Ethical approval was not required.  
14  
15

#### 16 17 **FUNDING STATEMENT**

18  
19  
20 This research received no specific grant from any funding agency in the public, commercial  
21  
22 or not-for-profit sections.  
23  
24  
25

#### 26 27 **PATIENT AND PUBLIC INVOLVEMENT**

28  
29 This research was done without patient involvement. Patients were not invited to comment on the  
30  
31 study design and were not consulted to develop patient relevant outcomes or interpret the results.  
32  
33 Patients were not invited to contribute to the writing or editing of this document for readability or  
34  
35 accuracy.  
36  
37  
38  
39

#### 40 41 **DATA AVAILABILITY STATEMENT**

42  
43 All data relevant to the study are included in the article or uploaded as supplementary  
44  
45 information.  
46  
47  
48  
49

#### 50 51 **FIGURES LEGEND**

52  
53 Figure 1. PRISMA flow diagram

54  
55 Figure 2. Meta-analysis of eligible studies providing adequate data to calculate standardised  
56  
57 mean difference with 95% confidence interval  
58  
59  
60

1  
2  
3 Figure 3. Meta-analysis of eligible studies, excluding those considered to be at high risk of  
4  
5 bias

6  
7  
8 Figure 4. Meta-analysis of studies that provided follow-up observation points to determine  
9  
10 long-term effectiveness of intervention

11  
12  
13 Figure 5. Funnel plot of effect sizes and standard errors.  
14  
15  
16  
17  
18

## 19 REFERENCES

- 20  
21 1. Kim SS, Kaplowitz S, Johnston MV. The effects of physician empathy on patient  
22 satisfaction and compliance. *Eval Health Prof.* 2004;27:237-251
- 23  
24 2. Vermeire E, Hearnshaw H, Van Royen P, Denekens J. Patient adherence to  
25 treatment: three decades of research. A comprehensive review. *J Clin Pharm Ther.*  
26 2001;26(5):331-342
- 27  
28 3. Di Blasi Z, Harkness E, Ernst E, Georgiou A, Kleijnen J. Influence of context effects on  
29 health outcomes: A systematic review. *Lancet.* 2001;357(9258):757-62
- 30  
31 4. Kelley JM, Kraft-Todd G, Schapira L, Kossowsky J, Reiss H. The influences of the  
32 patient-clinician relationship on healthcare outcomes: A systematic review and  
33 meta-analysis of randomised controlled trials. *PLoS One.* 2014;9(4):e94207
- 34  
35 5. Thomas MR, Dyrbye LN, Huntington JL, Lawson KL, Novotny PJ, Sloan JA, Shanafelt  
36 TD. How do distress and well-being relate to medical student empathy? A  
37 multicentre study. *J Gen Intern Med.* 2007;22(2):177-183
- 38  
39 6. DiLalla LF, Hull SK, Dorsey JK. Effect of gender, age and relevant course work on  
40 attitudes toward empathy, patient spirituality and physician wellness. *Teach Learn  
41 Med.* 2004;16(2):165-170
- 42  
43  
44  
45  
46  
47  
48  
49  
50  
51  
52  
53  
54  
55  
56  
57  
58  
59  
60

- 1  
2  
3 7. The NHS Constitution for England. Health Education England. Department of Health.  
4  
5 2015. Available at:  
6  
7  
8 [https://assets.publishing.service.gov.uk/government/uploads/system/uploads/attach](https://assets.publishing.service.gov.uk/government/uploads/system/uploads/attachment_data/file/480482/NHS_Constitution_WEB.pdf)  
9  
10 [ment\\_data/file/480482/NHS\\_Constitution\\_WEB.pdf](https://assets.publishing.service.gov.uk/government/uploads/system/uploads/attachment_data/file/480482/NHS_Constitution_WEB.pdf) Accessed 5th February 2019  
11  
12
- 13 8. Cummins J and Bennett V. Compassion in Practice: Nursing, Midwifery and Care  
14  
15 Staff, our Vision and Strategy. Leeds: NHS Commissioning Board, 2012. Available at:  
16  
17 [https://www.england.nhs.uk/wp-content/uploads/2012/12/compassion-in-](https://www.england.nhs.uk/wp-content/uploads/2012/12/compassion-in-practice.pdf)  
18  
19 [practice.pdf](https://www.england.nhs.uk/wp-content/uploads/2012/12/compassion-in-practice.pdf). Accessed 5<sup>th</sup> February 2019  
20  
21
- 22 9. Francis R. Report of the Mid Staffordshire NHS Foundation Trust Public Inquiry:  
23  
24 Executive Summary. London: The Stationery Office, 2013. Available at:  
25  
26 [https://assets.publishing.service.gov.uk/government/uploads/system/uploads/attach](https://assets.publishing.service.gov.uk/government/uploads/system/uploads/attachment_data/file/279124/0947.pdf)  
27  
28 [ment\\_data/file/279124/0947.pdf](https://assets.publishing.service.gov.uk/government/uploads/system/uploads/attachment_data/file/279124/0947.pdf). Accessed 5<sup>th</sup> February 2019  
29  
30
- 31 10. Mercer SW, Reynolds W. Empathy and quality of care. Br J Gen Pract. 2002;  
32  
33 52(Suppl):S9-12  
34  
35
- 36 11. Colliver JA, Conlee MJ, Verhulst SJ, Dorsey JK. Reports of the decline of empathy  
37  
38 during medical education are greatly exaggerated: A re-examination of the research.  
39  
40 Acad Med. 2010;85(4):588–593  
41  
42
- 43 12. Smith KE, Norman GJ, Decety J. The complexity of empathy during medical school  
44  
45 training: Evidence for positive changes. Med Educ, 2017;51(11):1146-1159  
46  
47
- 48 13. Neumann M, Edelhauser F, Tauschel D, et al. Empathy decline and its reasons: A  
49  
50 systematic review of studies with medical students and residents. Acad Med J Assoc  
51  
52 Am Med Coll. 2011;86(8):996-1009  
53  
54  
55  
56  
57  
58  
59  
60

- 1  
2  
3 14. Hojat M, Vergare MJ, Maxwell K et al. The devil is in the third year: A longitudinal  
4  
5 study of erosion of empathy in medical school. *Acad Med J Assoc Am Med Coll.*  
6  
7  
8 2009;84(9):1182-1191  
9
- 10  
11 15. Nunes P, Williams S, Sa B, Stevenson K. A study of empathy decline in students from  
12  
13 five health disciplines during their first year of training. *Int J Med Educ.* 2011;2;12-17  
14
- 15  
16 16. Kelm Z, Womer J, Walter JK and Feudtner C. Interventions to cultivate physician  
17  
18 empathy: A systematic review. *BMC Med Educ.* 2014;14:219  
19
- 20  
21 17. Chen D, Lew R, Hershman W, Orlander J. A cross-sectional measurement of medical  
22  
23 student empathy. *J Gen Intern Med.* 2007;22(10):1434-8  
24
- 25  
26 18. Batt-Rawden SA, Chisholm MD, Anton B, Flickinger TE. Teaching empathy to medical  
27  
28 students: An updated, systematic review. *Acad Med.* 2013;88(8):1171-7  
29
- 30  
31 19. Kiosses VN, Karathanos VT, Tatsioni A. Empathy promoting interventions for health  
32  
33 professionals: A systematic review of RCTs. *Journal of Compassionate Health Care.*  
34  
35 2016;3:7  
36
- 37  
38 20. Patel S, Pelletier-Bui A, Smith S, Roberts MB, Kilgannon H, Trzeciak S, Roberts BW.  
39  
40 Curricula for empathy and compassion training in medical education: A systematic  
41  
42 review. *PLoS One.* 2019;14(8):e0221412  
43  
44
- 45  
46 21. Arthur A, Maben J, Wharrad H, Aldus C, Sarre S, Schneider J et al. Can Healthcare  
47  
48 Assistant Training (CHAT) improve the relational care of older people? Study  
49  
50 protocol for a pilot cluster randomised controlled trial. *Trials.* 2015;16:559  
51
- 52  
53 22. Higgins JJ and Green S. *The Cochrane Handbook for Systematic Reviews of*  
54  
55 *Interventions Version 5.1.0 [updated March 2011].* Chichester. The Cochrane  
56  
57 *Collaboration, 2011*  
58  
59  
60

- 1  
2  
3 23. Winter R, Roberts N, Howick J. Assessing the effect of empathy-enhancing  
4  
5 interventions in health education and training: A systematic review of randomised  
6  
7 controlled trials. PROSPERO: International prospective register of systematic  
8  
9 reviews. 2019  
10  
11  
12  
13 24. Moher D, Liberati A, Tetzlaff J, Altman DG, The PRISMA Group (2009). *Preferred*  
14  
15 *Reporting Items for Systematic Reviews and Meta-Analyses: The PRISMA*  
16  
17 *Statement*. BMJ 2009;339:b2535  
18  
19  
20 25. Schunemann H, Brozek J and Oxman A. GRADE Handbook for Grading Quality of  
21  
22 Evidence and Strength of Recommendation. Hamilton: Group TGW, 2008  
23  
24  
25 26. Alhassan M. Effect of a 2-day communication skills training on nursing and midwifery  
26  
27 students' empathy: a randomised controlled trial. BMJ Open 2019;9(3):e023666  
28  
29  
30 27. Blair Irvine A, Billow MB, Eberhage MG, Seeley JR, McMahon E, Bourgeois M. Mental  
31  
32 illness training for licensed staff in long-term care. Issues Ment Health Nurs  
33  
34 2012;33(3):181-194  
35  
36  
37 28. Buffel du Vaure C, Lemogne C, Bunge L, Catu-Pinault A, Hoertel N, Ghasarossian C et  
38  
39 al. Promoting empathy among medical students: A two-site randomized controlled  
40  
41 study. J Psychosom Res. 2017;103:102-107  
42  
43  
44 29. Butow P, Cockburn J, Girgis A, Bowman D, Schofield P, D'Este C et al. Increasing  
45  
46 oncologists' skills in eliciting and responding to emotional cues: Evaluation of a  
47  
48 communication skills training program. Psycho-oncology. 2008;17(3):209-218.  
49  
50  
51 30. Collins KL, Zweber A, Irwin AN et al. Impact of a fictional reading intervention on  
52  
53 empathy development in student pharmacists. Curr Pharm Teach Learn 2017;9(3):  
54  
55 498-503  
56  
57  
58  
59  
60



- 1  
2  
3 31. Daniels TG, Denny A, Andrews D. Using microcounseling to teach RN nursing  
4 students skills of therapeutic communication. Journal of Nursing Education  
5 1988;27(6):246-252  
6  
7  
8  
9  
10 32. Foster A, Chaudhary N, Kim T, Waller JL, Wong J, Borish M et al. Using Virtual  
11 Patients to Teach Empathy: A Randomized Controlled Study to Enhance Medical  
12 Students' Empathic Communication. Simulation in Healthcare: The Journal of The  
13 Society for Medical Simulation 2016;11(3):181-189  
14  
15  
16  
17  
18  
19  
20 33. Gholamzadeh S, Khastavaneh M, Khademian Z, Ghadakpour S. The effects of  
21 empathy skills training on nursing students' empathy and attitudes toward elderly  
22 people. BMC Med Educ 2018;18(1):198  
23  
24  
25  
26  
27  
28 34. Gould LJ, Griffiths P, Barker HR, Libberton P, Mesa-Eguiagaray I, Pickering R et al.  
29 Compassionate care intervention for hospital nursing teams caring for older people:  
30 A pilot cluster randomised controlled trial. BMJ Open 2018;8(2):e018563  
31  
32  
33  
34  
35 35. Hastings RP, Gillespie D, Flynn S, McNamara R, Taylor Z, Knight R et al. Who's  
36 challenging who training for staff empathy towards adults with challenging  
37 behaviour: cluster randomised controlled trial. JIDR 2018;62(9):798-813  
38  
39  
40  
41  
42 36. Hattink B, Meiland F, van der Roest H, Kevern P, Abiuso F, Bengtsson J et al. Web-  
43 Based STAR E-Learning Course Increases Empathy and Understanding in Dementia  
44 Caregivers: Results from a Randomized Controlled Trial in the Netherlands and the  
45 United Kingdom. J Med Internet Res 2015;17(10):e241  
46  
47  
48  
49  
50  
51  
52 37. Larti N, Ashouri E, Aarabi A. The effect of an empathy role-play program for  
53 operating room nursing students. J Educ Eval Health Prof 2018;15:29  
54  
55  
56  
57  
58  
59  
60

- 1  
2  
3 38. Lobchuk M, Hoplock L, Halas G, West C, Dika C, Schroeder W et al. Heart health  
4  
5 whispering: A randomized, controlled pilot study to promote nursing student  
6  
7 perspective-taking on carers' health risk behaviors. *BMC Nurs* 2018;17:21  
8  
9
- 10 39. Lor KB, Truong JTT, Ip EJ, Barnett MJ. A randomized prospective study on outcomes  
11  
12 of an empathy intervention among second-year student pharmacists. *Am J Pharm*  
13  
14 *Educ* 2015;79(2):18s  
15  
16
- 17 40. LoSasso AA, Lamberton CE, Sammon M, Berg K, Caruso JW, Cass J et al. Enhancing  
18  
19 Student Empathetic Engagement, History-Taking, and Communication Skills During  
20  
21 Electronic Medical Record Use in Patient Care. *Acad Med* 2017;92(7):1022-1027  
22  
23
- 24 41. Mueller K, Prins R, de Heer H. An Online Intervention Increases Empathy, Resilience,  
25  
26 and Work Engagement Among Physical Therapy Students. *Journal of Allied Health*  
27  
28 *2018; 47(3):196-203*  
29  
30
- 31 42. Reiss H, Kelley JM, Bailey RW, Dunn EJ, Phillips M. Empathy training for resident  
32  
33 physicians: a randomized controlled trial of a neuroscience-informed curriculum. *J*  
34  
35 *Gen Intern Med* 2012;27(10):1280-1286  
36  
37
- 38 43. Shapiro SL, Schwartz GE, Bonner G. Effects of mindfulness-based stress reduction on  
39  
40 medical and premedical students. *Journal of Behavioral Medicine* 1998;21(6):581-  
41  
42 599  
43  
44
- 45 44. Sripada BN, Henry DB, Jobe TH, Winer JA, Schoeny ME, Gibbons RD. A randomized  
46  
47 controlled trial of a feedback method for improving empathic accuracy in  
48  
49 psychotherapy. *Psychol Psychother* 2011;84(2):113-127  
50  
51
- 52 45. Sterkenburg PS, Vacaru VS. The effectiveness of a serious game to enhance empathy  
53  
54 for care workers for people with disabilities: A parallel randomized controlled trial.  
55  
56 *Disability and Health J* 2018;11(4):576-582  
57  
58  
59  
60

- 1  
2  
3 46. Tulskey JA, Arnold RM, Alexander SC, Olsen MK, Jeffreys AS, Rodriguez KL. Enhancing  
4  
5 communication between oncologists and patients with a computer-based training  
6  
7 program: A randomized trial. *Annals of Internal Medicine* 2011;155(9):593-601  
8  
9
- 10 47. Vaghee S, Loffabadi MK, Salarhaji A, Vaghei N, Hashemi BM. Comparing the Effects  
11  
12 of Contact-Based Education and Acceptance and Commitment-Based Training on  
13  
14 Empathy toward Mental Illnesses among Nursing Students. *Iranian Journal of*  
15  
16 *Psychiatry* 2018;13(2):119-127  
17  
18
- 19 48. Wolf FM, Woolliscroft JO, Calhoun JG, Boxer GJ. A controlled experiment in teaching  
20  
21 students to respond to patients' emotional concerns. *J Med Educ* 1987;62(1):25-3  
22  
23
- 24 49. Wundrich M, Schwartz C, Feige B, Lemper D, Nissen C, Voderholzer U. Empathy  
25  
26 training in medical students - a randomized controlled trial. *Med Teach* 2017;39(10):  
27  
28 1096-1098  
29  
30
- 31 50. Yang N, Xiao H, Cao Y, Li S, Yan H, Wang Y. Does narrative medicine education  
32  
33 improve nursing students' empathic abilities and academic achievement? A  
34  
35 randomised controlled trial. *J Int Med Res* 2018;46(8):3306-3317  
36  
37
- 38 51. Hojat M, Gonnella JS, Nasca TJ, *et al.* Physician empathy: Definition, components,  
39  
40 measurement, and relationship to gender and specialty. *Am J Psychiatry*  
41  
42 2002;159:1563-9  
43
- 44 52. Mehrabian A, Epstein N. A measure of emotional empathy. *J Pers.* 1972;40:525-43.  
45
- 46 53. Ekman P. *Emotions revealed: Recognizing faces and feelings to improve*  
47  
48 *communication and emotional life.* New York: Holt; 2004
- 49 54. Spreng RN, McKinnon MC, Mar RA, Levine B. The Toronto Empathy Questionnaire:  
50  
51 scale development and initial validation of a factor-analytic solution to multiple  
52  
53 empathy measures. *J Pers Assess* 2009;91:62-71  
54
- 55 55. Mercer SW, Maxwell M, Heaney D, Watt GCM. The consultation and relational  
56  
57 empathy (CARE) measure: development and preliminary validation and reliability of  
58  
59 an empathy-based consultation process measure. *Fam Pract.* 2004;21(6):699-705  
60

- 1  
2  
3 56. Carkhuff RR. Helping and human relations: A primer for lay and professional helpers.  
4 Montreal-Toronto: Holt, Rinehart and Winston Inc  
5  
6  
7 57. Howick J, Moscrop A, Mebius A, Fanshawe T, Lewith G, Bishop FL et al. Effects of  
8 empathic and positive communication in healthcare consultations: a systematic  
9 review and meta-analysis. J R Soc Med. 2018;111(70):240-252  
10  
11  
12  
13  
14  
15  
16  
17  
18  
19  
20  
21  
22  
23  
24  
25  
26  
27  
28  
29  
30  
31  
32  
33  
34  
35  
36  
37  
38  
39  
40  
41  
42  
43  
44  
45  
46  
47  
48  
49  
50  
51  
52  
53  
54  
55  
56  
57  
58  
59  
60

For peer review only

1  
2  
3  
4  
5  
6  
7  
8  
9  
10  
11  
12  
13  
14  
15  
16  
17  
18  
19  
20  
21  
22  
23  
24  
25  
26  
27  
28  
29  
30  
31  
32  
33  
34  
35  
36  
37  
38  
39  
40  
41  
42  
43  
44  
45  
46  
47  
48  
49  
50  
51  
52  
53  
54  
55  
56  
57  
58  
59  
60

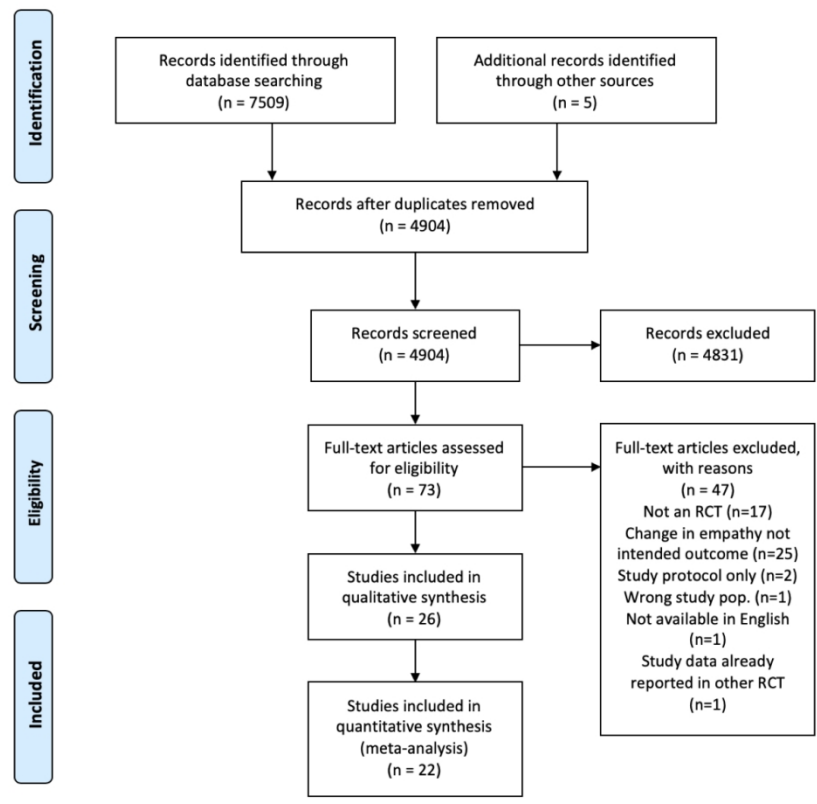

Figure 1. PRISMA flow diagram  
209x297mm (150 x 150 DPI)

1  
2  
3  
4  
5  
6  
7  
8  
9  
10  
11  
12  
13  
14  
15  
16  
17  
18  
19  
20  
21  
22  
23  
24  
25  
26  
27  
28  
29  
30  
31  
32  
33  
34  
35  
36  
37  
38  
39  
40  
41  
42  
43  
44  
45  
46  
47  
48  
49  
50  
51  
52  
53  
54  
55  
56  
57  
58  
59  
60

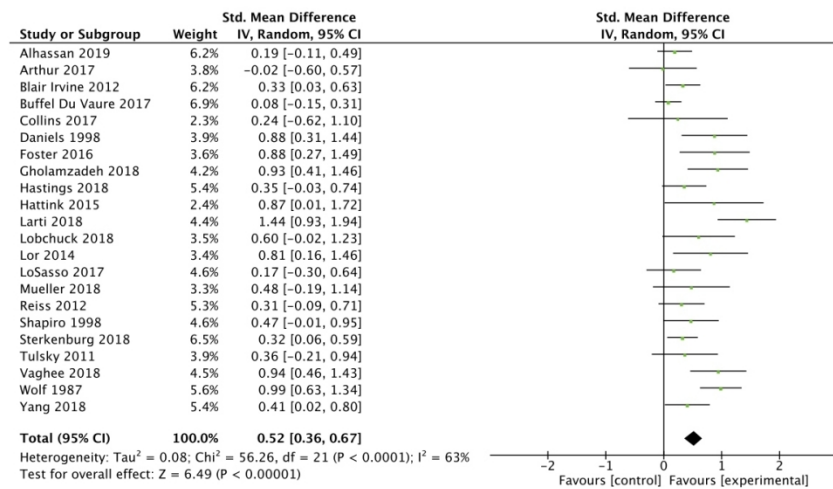

Figure 2. Meta-analysis of eligible studies providing adequate data to calculate standardised mean difference with 95% confidence interval

215x279mm (150 x 150 DPI)

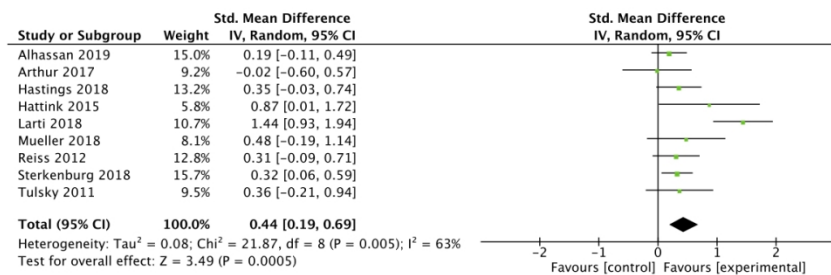

Figure 3. Meta-analysis of eligible studies, excluding those considered to be at high risk of bias

215x279mm (150 x 150 DPI)

1  
2  
3  
4  
5  
6  
7  
8  
9  
10  
11  
12  
13  
14  
15  
16  
17  
18  
19  
20  
21  
22  
23  
24  
25  
26  
27  
28  
29  
30  
31  
32  
33  
34  
35  
36  
37  
38  
39  
40  
41  
42  
43  
44  
45  
46  
47  
48  
49  
50  
51  
52  
53  
54  
55  
56  
57  
58  
59  
60

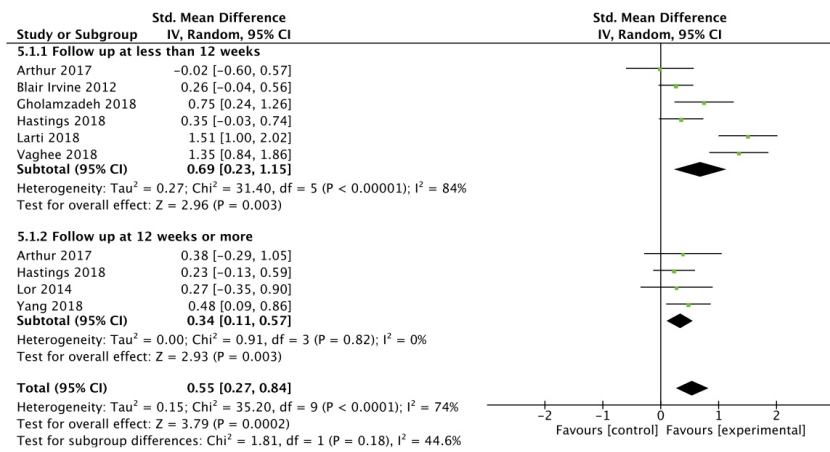

Figure 4. Meta-analysis of studies that provided follow-up observation points to determine long-term effectiveness of intervention

215x279mm (150 x 150 DPI)



1  
2  
3  
4  
5  
6  
7  
8  
9  
10  
11  
12  
13  
14  
15  
16  
17  
18  
19  
20  
21  
22  
23  
24  
25  
26  
27  
28  
29  
30  
31  
32  
33  
34  
35  
36  
37  
38  
39  
40  
41  
42  
43  
44  
45  
46  
47  
48  
49  
50  
51  
52  
53  
54  
55  
56  
57  
58  
59  
60

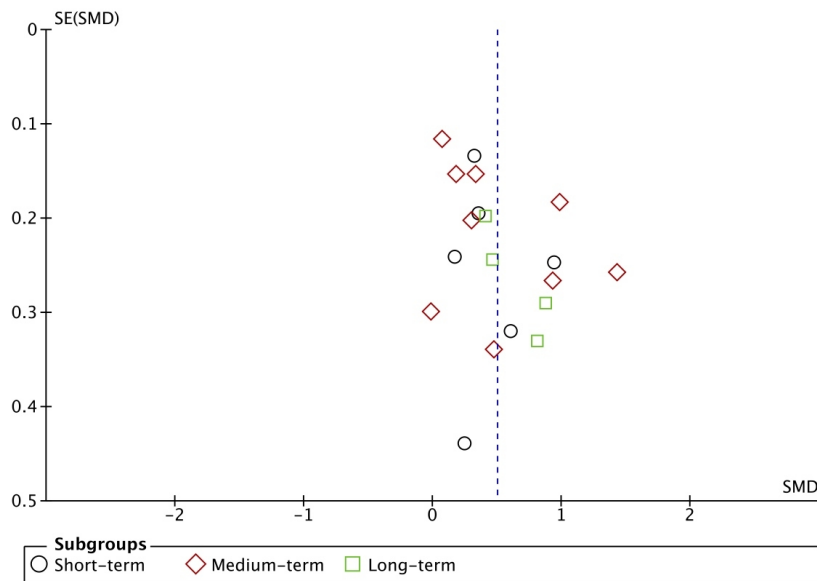

Figure 5. Funnel plot of effect sizes and standard errors  
215x279mm (150 x 150 DPI)

1 Winter R, Isa E, Roberts N, Norman RI, Howick J 2019  
2

3 **SUPPLEMENT**  
4  
5

6  
7  
8 **Additional results (eResults)**  
9

10  
11 **Study selection**

12  
13 The literature search resulted in 7,509 citations. EMBASE included 2,754, PsychINFO 1767,  
14  
15 CINAHL 381, MEDLINE 2441 and Cochrane 346. An additional five records were identified  
16  
17 through other sources. After duplications were removed 4904 citations remained. 4831  
18  
19 citations were excluded after screening abstracts. Seventy-two articles were retrieved for  
20  
21 full-text review. Forty-six studies were excluded (eTable 2). The total number of eligible  
22  
23 papers included in this review was 26<sup>25-50</sup> (n=2,900). See eTable3 for descriptive  
24  
25 characteristics.  
26  
27  
28  
29  
30  
31  
32

33 **Risk of bias within studies**  
34  
35

36  
37 **Allocation**  
38

39  
40 Thirteen studies were considered to be low risk for random sequence  
41  
42 generation,[25,26,29,33-38,41,45,46] of which seven employed some form of computer  
43  
44 randomisation,[26,34,35,36,38,42,45] one used the minimisation method,[46] one used a  
45  
46 random numbers table[29] and three used a low-tech method[25,37,41] (for example a  
47  
48 shuffled pack of cards). Thirteen trials were considered to have an unclear risk[27,28,30-  
49  
50 32,39,40.43,44,47-50] with 12 of these stating that participants were randomly assigned but  
51  
52 not describing the method.[27,30-32,39,40.43,44,47-50] One trial used participants from  
53  
54 two different sites, using computer randomisation at one site but not describing the method  
55  
56  
57  
58  
59  
60

1 Winter R, Isa E, Roberts N, Norman RI, Howick J 2019

2  
3 of randomisation at the other.[28] The risk of bias for allocation concealment was  
4  
5 considered low for 11 studies[25,26,29,34-37,41,42,45,46] and was well described in each  
6  
7 of these. Fifteen studies did not describe or clearly describe allocation concealment and so  
8  
9 were considered unclear in terms of risk.[27,28,30-33,38,39,40,43,44,47-50]  
10  
11  
12  
13  
14

## 15 Blinding

16  
17 Whilst blinding of participants was not possible in the majority of the trials, due to the  
18  
19 nature of the interventions, one study did blind participants.[45] This was achieved by using  
20  
21 an online package to deliver either a 'serious game' (experimental) intervention or a 'digital  
22  
23 reading' (control) intervention. Participants were unaware of which was the control and  
24  
25 which was the experimental intervention so were unaware which they were participating in  
26  
27 once they had been randomly allocated to one or the other. In two trials it was unclear  
28  
29 whether participants had been adequately blinded.[27,32] Similarly, blinding of outcome  
30  
31 assessors was not always possible due to the self-reported nature of outcome assessments  
32  
33 used by many studies. However three studies reported blinding of outcome assessors<sup>32,45,46</sup>  
34  
35 three were unclear if blinding had occurred[27,29,44] and 15 were rated as high risk as no  
36  
37 blinding of outcome assessment had occurred.[25,26,30,31,33-37,39,41,43,47,48,50] Five  
38  
39 studies reported a 'mixed' picture with blinding of the outcome assessment reported for  
40  
41 some outcome measures and not for others.[28,38,40,42,49] For example Reiss et al [42]  
42  
43 used the observer rated CARE scale, blinding the assessors to physician randomisation and  
44  
45 three non-blinded self-rated scales to measure empathy.  
46  
47  
48  
49  
50  
51  
52  
53  
54  
55  
56

## 57 Incomplete outcome data

1 Winter R, Isa E, Roberts N, Norman RI, Howick J 2019

2  
3 Incomplete outcome data was considered to be 'low risk' in 19 studies,[25,27-30,32,33,37-  
4 47,50] with attrition rates ranging from 0-16%. The risk was unclear in three  
5  
6 studies[31,48,49 ]and considered high in four.[26,34,35,36]  
7  
8  
9

### 10 11 12 13 Selective reporting

14  
15 Eighteen trials described all pre-specified outcomes as stated in the methodology.[25-  
16 30,32,35-41,45,46] One trial presented an 'unclear risk' (Daniels et al[31] described  
17 dropping all males from the analysis) and seven studies were high risk for selective  
18 reporting.[33,34,43,47-49] Gould et al[34] for example did not report the data associated  
19 with the JSE questionnaire which was one of the specified outcomes.  
20  
21  
22  
23  
24  
25  
26  
27  
28  
29

### 30 Other potential sources of bias

31  
32 Five trials were cluster RCTs,[26,34,35,47,50] of which three were considered low risk for  
33 recruitment bias[26,34,35] and two were identified as either unclear or high risk.[47,50]  
34  
35 Eight studies were identified to be at either a high risk or unclear risk from 'other potential  
36 sources of bias.[27,29,31,34,38,44,48,49] For example Butow et al[29] reported differences  
37 between the study groups in baseline characteristics and six other studies did not report  
38 baseline demographics and/or empathy measurements at baseline.  
39  
40  
41  
42  
43  
44  
45  
46  
47  
48  
49  
50

### 51 Sustainability of improved empathy analysis

52  
53  
54 Eleven studies provided follow-up data assessing sustainability of changes to empathy, in  
55 addition to post intervention measurement.[25-27,29,31,33,35,37,39,47,50] Eight were  
56 eligible for inclusion in a sub-group analysis.[26,27,33,35,37,39,47,50] One was excluded  
57  
58  
59  
60

1 Winter R, Isa E, Roberts N, Norman RI, Howick J 2019

2  
3 from all meta-analyses due to lack of data,[29] one was excluded from this meta-analysis as  
4  
5 the empathy-intervention was delivered to the control group prior to the follow-up  
6  
7  
8 measures being taken,[25] and one was excluded as the follow-up data was not  
9  
10 reported.[31] Studies were divided into two groups; those reporting follow up measures at  
11  
12 less than 12 weeks and those reporting follow up at 12 weeks or later (figure 4). Arthur et  
13  
14 al[26] and Hastings et al[35] provided multiple follow up data at time points that could be  
15  
16 included in both groups (at 8 weeks and 12 weeks, and at 6 weeks and 20 weeks  
17  
18 respectively). Meta-analysis found a moderate effect size for improved empathy until 12  
19  
20 weeks (effect size 0.69 95% CI 0.23-1.15) and a small but statistically significant effect size  
21  
22 for sustainability at 12 weeks and later (effect size 0.34 95% CI 0.11 to 0.57).  
23  
24  
25  
26  
27  
28

### 29 Type of intervention analysis

30  
31  
32 A meta-analysis comparing sub-groups of different types of intervention (eFigure 2) found  
33  
34 the greatest effect was with empathy training that was communication skills-based (effect  
35  
36 size 0.69 [95% confidence interval 0.32 to 1.06]). The smallest effect reported was for  
37  
38 interventions that were described as 'mixed educational programmes' and ones based in  
39  
40 the arts and humanities (effect size 0.39 [95% confidence interval 0.18 to 0.61] and 0.38  
41  
42 [95% confidence interval 0.03 to 0.73] respectively). Interventions labelled as 'empathy  
43  
44 skills-based training' had a positive but not statistically significant overall effect (0.60, 95%  
45  
46 confidence interval -0.02 to 1.21).  
47  
48  
49  
50  
51  
52  
53  
54  
55  
56  
57  
58  
59  
60

Winter R, Isa E, Roberts N, Norman RI, Howick J 2019

eTable 1. Search strategies

| <b>MEDLINE</b> |                                                                                                                                                                                                                                                                                                                                   |         |
|----------------|-----------------------------------------------------------------------------------------------------------------------------------------------------------------------------------------------------------------------------------------------------------------------------------------------------------------------------------|---------|
| # ▲            | Searches                                                                                                                                                                                                                                                                                                                          | Results |
| 1              | exp Students/                                                                                                                                                                                                                                                                                                                     | 116946  |
| 2              | student?.ti,ab.                                                                                                                                                                                                                                                                                                                   | 254787  |
| 3              | (physician? or doctor? or intern? or internship or resident? or residency or nurse? or health* professional? or health* worker? or health* staff*).ti.                                                                                                                                                                            | 295930  |
| 4              | exp Health Personnel/                                                                                                                                                                                                                                                                                                             | 481003  |
| 5              | 1 or 2 or 3 or 4                                                                                                                                                                                                                                                                                                                  | 906748  |
| 6              | exp Education/                                                                                                                                                                                                                                                                                                                    | 767285  |
| 7              | ed.fs.                                                                                                                                                                                                                                                                                                                            | 264737  |
| 8              | ((intervention? or program*) adj5 (train* or educat* or course? or workshop? or staff development or professional development or curriculum or curricula)).ti,ab.                                                                                                                                                                 | 137613  |
| 9              | (train* or educat* or course? or workshop? or staff development or professional development or curriculum or curricula).ti.                                                                                                                                                                                                       | 369134  |
| 10             | (intervention or program*).ti.                                                                                                                                                                                                                                                                                                    | 260613  |
| 11             | 6 or 7 or 8 or 9 or 10                                                                                                                                                                                                                                                                                                            | 1249776 |
| 12             | 5 and 11                                                                                                                                                                                                                                                                                                                          | 335534  |
| 13             | ((physician? or doctor? or surgeon? or intern? or internship or resident? or residency or nurse? or health* professional? or health* worker? or health* staff* or practitioner? or student?) adj5 (train* or educat* or course? or workshop? or staff development or professional development or curriculum or curricula)).ti,ab. | 137434  |
| 14             | 12 or 13                                                                                                                                                                                                                                                                                                                          | 393662  |
| 15             | Empathy/                                                                                                                                                                                                                                                                                                                          | 17455   |
| 16             | (empath* or compassion*).ti,ab.                                                                                                                                                                                                                                                                                                   | 21716   |
| 17             | 15 or 16                                                                                                                                                                                                                                                                                                                          | 31561   |
| 18             | randomized controlled trial.pt.                                                                                                                                                                                                                                                                                                   | 481154  |
| 19             | controlled clinical trial.pt.                                                                                                                                                                                                                                                                                                     | 93050   |
| 20             | randomized.ab.                                                                                                                                                                                                                                                                                                                    | 441413  |
| 21             | placebo.ab.                                                                                                                                                                                                                                                                                                                       | 197236  |
| 22             | drug therapy.fs.                                                                                                                                                                                                                                                                                                                  | 2104120 |
| 23             | randomly.ab.                                                                                                                                                                                                                                                                                                                      | 309893  |
| 24             | trial.ab.                                                                                                                                                                                                                                                                                                                         | 461528  |
| 25             | groups.ab.                                                                                                                                                                                                                                                                                                                        | 1906393 |

Winter R, Isa E, Roberts N, Norman RI, Howick J 2019

|    |                                                                                                                                                                                                                                                                                      |          |
|----|--------------------------------------------------------------------------------------------------------------------------------------------------------------------------------------------------------------------------------------------------------------------------------------|----------|
| 26 | multicenter study.pt.                                                                                                                                                                                                                                                                | 249476   |
| 27 | pragmatic clinical trial.pt.                                                                                                                                                                                                                                                         | 1037     |
| 28 | (multicenter or multi center or multicentre or multi centre).ti.                                                                                                                                                                                                                     | 47574    |
| 29 | (intervention? or effect? or impact? or controlled or control group? or (before adj5 after) or (pre adj5 post) or ((pretest or pre test) and (posttest or post test)) or quasiexperiment* or quasi experiment* or evaluat* or time series or time point? or repeated measur*).ti,ab. | 8937416  |
| 30 | 18 or 19 or 20 or 21 or 22 or 23 or 24 or 25 or 26 or 27 or 28 or 29                                                                                                                                                                                                                 | 11030368 |
| 31 | 14 and 17 and 30                                                                                                                                                                                                                                                                     | 2441     |

| <b>EMBASE</b> |                                                                                                                                                                                                                                                                                                                                   |         |
|---------------|-----------------------------------------------------------------------------------------------------------------------------------------------------------------------------------------------------------------------------------------------------------------------------------------------------------------------------------|---------|
| # ▲           | Searches                                                                                                                                                                                                                                                                                                                          | Results |
| 1             | *student/ or exp *health student/                                                                                                                                                                                                                                                                                                 | 68463   |
| 2             | student?.ti,ab.                                                                                                                                                                                                                                                                                                                   | 326421  |
| 3             | exp *health care personnel/                                                                                                                                                                                                                                                                                                       | 479224  |
| 4             | (physician? or doctor? or intern? or internship or resident? or residency or nurse? or health* professional? or health* worker? or health* staff*).ti.                                                                                                                                                                            | 301997  |
| 5             | 1 or 2 or 3 or 4                                                                                                                                                                                                                                                                                                                  | 941482  |
| 6             | education/ or continuing education/ or curriculum/ or education program/ or in service training/ or lifelong learning/ or exp medical education/ or exp paramedical education/ or postgraduate education/                                                                                                                         | 736812  |
| 7             | ((intervention? or program*) adj5 (train* or educat* or course? or workshop? or staff development or professional development or curriculum or curricula)).ti,ab.                                                                                                                                                                 | 184005  |
| 8             | (train* or educat* or course? or workshop? or staff development or professional development or curriculum or curricula).ti.                                                                                                                                                                                                       | 399259  |
| 9             | (intervention or program*).ti.                                                                                                                                                                                                                                                                                                    | 318923  |
| 10            | 6 or 7 or 8 or 9                                                                                                                                                                                                                                                                                                                  | 1266300 |
| 11            | 5 and 10                                                                                                                                                                                                                                                                                                                          | 281380  |
| 12            | ((physician? or doctor? or surgeon? or intern? or internship or resident? or residency or nurse? or health* professional? or health* worker? or health* staff* or practitioner? or student?) adj5 (train* or educat* or course? or workshop? or staff development or professional development or curriculum or curricula)).ti,ab. | 179470  |
| 13            | 11 or 12                                                                                                                                                                                                                                                                                                                          | 369015  |

Winter R, Isa E, Roberts N, Norman RI, Howick J 2019

|    |                                                                                                                                                                                                                                                                                      |          |
|----|--------------------------------------------------------------------------------------------------------------------------------------------------------------------------------------------------------------------------------------------------------------------------------------|----------|
| 14 | Empathy/                                                                                                                                                                                                                                                                             | 23785    |
| 15 | (empath* or compassion*).ti,ab.                                                                                                                                                                                                                                                      | 28390    |
| 16 | 14 or 15                                                                                                                                                                                                                                                                             | 39458    |
| 17 | 13 and 16                                                                                                                                                                                                                                                                            | 4903     |
| 18 | randomized controlled trial/                                                                                                                                                                                                                                                         | 545326   |
| 19 | single blind procedure/ or double blind procedure/                                                                                                                                                                                                                                   | 192596   |
| 20 | crossover procedure/                                                                                                                                                                                                                                                                 | 58851    |
| 21 | random*.tw.                                                                                                                                                                                                                                                                          | 1400168  |
| 22 | ((singl* or doubl*) adj (blind* or mask*)) or crossover or cross over or factorial* or latin square or assign* or allocat* or volunteer*).ti,ab.                                                                                                                                     | 983905   |
| 23 | pragmatic trial/ or multicenter study/                                                                                                                                                                                                                                               | 213866   |
| 24 | intervention study/                                                                                                                                                                                                                                                                  | 40085    |
| 25 | (multicenter or multi center or multicentre or multi centre).ti.                                                                                                                                                                                                                     | 74011    |
| 26 | (intervention? or effect? or impact? or controlled or control group? or (before adj5 after) or (pre adj5 post) or ((pretest or pre test) and (posttest or post test)) or quasiexperiment* or quasi experiment* or evaluat* or time series or time point? or repeated measur*).ti,ab. | 11312699 |
| 27 | 18 or 19 or 20 or 21 or 22 or 23 or 24 or 25 or 26                                                                                                                                                                                                                                   | 12032330 |
| 28 | (exp animals/ or nonhuman/) not human/                                                                                                                                                                                                                                               | 6212385  |
| 29 | 27 not 28                                                                                                                                                                                                                                                                            | 9294426  |
| 30 | 17 and 29                                                                                                                                                                                                                                                                            | 2574     |

| <b>PsychINFO</b> |                                                                                                                                                                   |         |
|------------------|-------------------------------------------------------------------------------------------------------------------------------------------------------------------|---------|
| # ▲              | Searches                                                                                                                                                          | Results |
| 1                | students/ or medical students/                                                                                                                                    | 35317   |
| 2                | student?.ti,ab.                                                                                                                                                   | 481295  |
| 3                | exp health personnel/                                                                                                                                             | 128154  |
| 4                | (physician? or doctor? or intern? or internship or resident? or residency or nurse? or health* professional? or health* worker? or health* staff*).ti.            | 47232   |
| 5                | 1 or 2 or 3 or 4                                                                                                                                                  | 616902  |
| 6                | education/ or exp curriculum/ or distance education/ or nursing education/ or paraprofessional education/ or exp personnel training/ or exp medical education/    | 186066  |
| 7                | ((intervention? or program*) adj5 (train* or educat* or course? or workshop? or staff development or professional development or curriculum or curricula)).ti,ab. | 100952  |



Winter R, Isa E, Roberts N, Norman RI, Howick J 2019

|    |                                                                                                                                                                                                                                                                                                                                   |         |
|----|-----------------------------------------------------------------------------------------------------------------------------------------------------------------------------------------------------------------------------------------------------------------------------------------------------------------------------------|---------|
| 8  | (train* or educat* or course? or workshop? or staff development or professional development or curriculum or curricula).ti.                                                                                                                                                                                                       | 207043  |
| 9  | (intervention or program*).ti.                                                                                                                                                                                                                                                                                                    | 121597  |
| 10 | 6 or 7 or 8 or 9                                                                                                                                                                                                                                                                                                                  | 455304  |
| 11 | 5 and 10                                                                                                                                                                                                                                                                                                                          | 166574  |
| 12 | ((physician? or doctor? or surgeon? or intern? or internship or resident? or residency or nurse? or health* professional? or health* worker? or health* staff* or practitioner? or student?) adj5 (train* or educat* or course? or workshop? or staff development or professional development or curriculum or curricula)).ti,ab. | 98357   |
| 13 | 11 or 12                                                                                                                                                                                                                                                                                                                          | 209818  |
| 14 | Empathy/                                                                                                                                                                                                                                                                                                                          | 12489   |
| 15 | (empath* or compassion*).ti,ab.                                                                                                                                                                                                                                                                                                   | 37254   |
| 16 | 14 or 15                                                                                                                                                                                                                                                                                                                          | 38291   |
| 17 | 13 and 16                                                                                                                                                                                                                                                                                                                         | 3043    |
| 18 | random*.ti,ab,hw,id.                                                                                                                                                                                                                                                                                                              | 187448  |
| 19 | trial*.ti,ab,hw,id.                                                                                                                                                                                                                                                                                                               | 172104  |
| 20 | controlled stud*.ti,ab,hw,id.                                                                                                                                                                                                                                                                                                     | 11726   |
| 21 | placebo*.ti,ab,hw,id.                                                                                                                                                                                                                                                                                                             | 38934   |
| 22 | ((singl* or doubl* or trebl* or tripl*) and (blind* or mask*)).ti,ab,hw,id.                                                                                                                                                                                                                                                       | 27892   |
| 23 | (cross over or crossover or factorial* or latin square).ti,ab,hw,id.                                                                                                                                                                                                                                                              | 28819   |
| 24 | (assign* or allocat* or volunteer*).ti,ab,hw,id.                                                                                                                                                                                                                                                                                  | 156473  |
| 25 | treatment effectiveness evaluation/                                                                                                                                                                                                                                                                                               | 22860   |
| 26 | mental health program evaluation/                                                                                                                                                                                                                                                                                                 | 2062    |
| 27 | exp experimental design/                                                                                                                                                                                                                                                                                                          | 54976   |
| 28 | (clinical trial or treatment outcome).md.                                                                                                                                                                                                                                                                                         | 41809   |
| 29 | intervention/                                                                                                                                                                                                                                                                                                                     | 58790   |
| 30 | (multicenter or multi center or multicentre or multi centre).ti.                                                                                                                                                                                                                                                                  | 2788    |
| 31 | (intervention? or effect? or impact? or controlled or control group? or (before adj5 after) or (pre adj5 post) or ((pretest or pre test) and (posttest or post test)) or quasiexperiment* or quasi experiment* or evaluat* or time series or time point? or repeated measur*).ti,ab.                                              | 1834258 |
| 32 | 18 or 19 or 20 or 21 or 22 or 23 or 24 or 25 or 26 or 27 or 28 or 29 or 30 or 31                                                                                                                                                                                                                                                  | 2026090 |
| 33 | 17 and 32                                                                                                                                                                                                                                                                                                                         | 1767    |

Winter R, Isa E, Roberts N, Norman RI, Howick J 2019

| CINAHL |                                                                                                                                                                                                                                                                                                                                                                                                                                                                                                                                                                                                                                                                                                                                                                                                                                                                                                                                      |         |
|--------|--------------------------------------------------------------------------------------------------------------------------------------------------------------------------------------------------------------------------------------------------------------------------------------------------------------------------------------------------------------------------------------------------------------------------------------------------------------------------------------------------------------------------------------------------------------------------------------------------------------------------------------------------------------------------------------------------------------------------------------------------------------------------------------------------------------------------------------------------------------------------------------------------------------------------------------|---------|
| #      | Query                                                                                                                                                                                                                                                                                                                                                                                                                                                                                                                                                                                                                                                                                                                                                                                                                                                                                                                                | Results |
| S17    | S13 AND S16                                                                                                                                                                                                                                                                                                                                                                                                                                                                                                                                                                                                                                                                                                                                                                                                                                                                                                                          | 381     |
| S16    | S14 NOT S15                                                                                                                                                                                                                                                                                                                                                                                                                                                                                                                                                                                                                                                                                                                                                                                                                                                                                                                          | 556,315 |
| S15    | (MH animals+ OR MH (animal studies) OR TI (animal model*)) NOT MH (human)                                                                                                                                                                                                                                                                                                                                                                                                                                                                                                                                                                                                                                                                                                                                                                                                                                                            | 154,114 |
| S14    | MH randomized controlled trials OR MH double-blind studies OR MH single-blind studies OR MH random assignment OR MH pretest-posttest design OR MH cluster sample OR TI (randomised OR randomized) OR AB (random*) OR TI (trial) OR (MH (sample size) AND AB (assigned OR allocated OR control)) OR MH (placebos) OR PT (randomized controlled trial) OR AB (control W5 group) OR MH (crossover design) OR MH (comparative studies) OR AB (cluster W3 RCT)                                                                                                                                                                                                                                                                                                                                                                                                                                                                            | 579,579 |
| S13    | S9 AND S12                                                                                                                                                                                                                                                                                                                                                                                                                                                                                                                                                                                                                                                                                                                                                                                                                                                                                                                           | 2,335   |
| S12    | S10 OR S11                                                                                                                                                                                                                                                                                                                                                                                                                                                                                                                                                                                                                                                                                                                                                                                                                                                                                                                           | 17,823  |
| S11    | TI ( empath* or compassion* ) OR AB ( empath* or compassion* )                                                                                                                                                                                                                                                                                                                                                                                                                                                                                                                                                                                                                                                                                                                                                                                                                                                                       | 13,814  |
| S10    | (MH "Empathy")                                                                                                                                                                                                                                                                                                                                                                                                                                                                                                                                                                                                                                                                                                                                                                                                                                                                                                                       | 8,360   |
| S9     | S7 OR S8                                                                                                                                                                                                                                                                                                                                                                                                                                                                                                                                                                                                                                                                                                                                                                                                                                                                                                                             | 188,626 |
| S8     | TI ( (physician? or doctor? or intern? or internship or resident? or residency or nurse? or "health professional*" or "health worker*" or "health staff*" or "healthcare professional*" or "healthcare worker*" or "healthcare staff*" or "health care professional*" or "health care worker*" or "health care professional*" ) N5 (train* or educat* or course? or workshop? or "staff development" or "professional development" or curriculum or curricula ) OR AB ( (physician? or doctor? or intern? or internship or resident? or residency or nurse? or "health professional*" or "health worker*" or "health staff*" or "healthcare professional*" or "healthcare worker*" or "healthcare staff*" or "health care professional*" or "health care worker*" or "health care professional*" ) N5 (train* or educat* or course? or workshop? or "staff development" or "professional development" or curriculum or curricula ) ) | 55,142  |
| S7     | (S3 AND S6)                                                                                                                                                                                                                                                                                                                                                                                                                                                                                                                                                                                                                                                                                                                                                                                                                                                                                                                          | 158,577 |

Winter R, Isa E, Roberts N, Norman RI, Howick J 2019

|    |                                                                                                                                                                                                                                                                                                                                                              |         |
|----|--------------------------------------------------------------------------------------------------------------------------------------------------------------------------------------------------------------------------------------------------------------------------------------------------------------------------------------------------------------|---------|
| S6 | S4 OR S5                                                                                                                                                                                                                                                                                                                                                     | 550,634 |
| S5 | TI ( train* or educat* or course? or workshop? or "staff development" or "professional development" or curriculum or curricula ) OR AB ( ((intervention? or program*) N5 (train* or educat* or course? or workshop? or "staff development" or "professional development" or curriculum or curricula) ) OR TI(intervention? or program*)                      | 349,186 |
| S4 | (MH "Curriculum+") OR (MH "Education, Clinical+") OR (MH "Education, Health Sciences+") OR (MH "Staff Development") OR (MH "Education")                                                                                                                                                                                                                      | 294,559 |
| S3 | S1 OR S2                                                                                                                                                                                                                                                                                                                                                     | 663,254 |
| S2 | TI student? OR AB student? OR TI ( physician? or doctor? or intern? or internship or resident? or residency or nurse? or "health professional*" or "health worker*" or "health staff*" or "healthcare professional*" or "healthcare worker*" or "healthcare staff*" or "health care professional*" or "health care worker*" or "health care professional*" ) | 226,699 |
| S1 | (MH "Students, Health Occupations+") OR (MH "Health Personnel+")                                                                                                                                                                                                                                                                                             | 529,459 |

**COCHRANE**

| ID | Search                                                                                                                                                                                                                                                                                                                                      |
|----|---------------------------------------------------------------------------------------------------------------------------------------------------------------------------------------------------------------------------------------------------------------------------------------------------------------------------------------------|
| #1 | MeSH descriptor: [Students] explode all trees                                                                                                                                                                                                                                                                                               |
| #2 | (student*):ti,ab,kw                                                                                                                                                                                                                                                                                                                         |
| #3 | MeSH descriptor: [Health Personnel] explode all trees                                                                                                                                                                                                                                                                                       |
| #4 | (physician* or doctor* or intern or interns or internship or resident* or residency or nurse* or "health professional*" or "health worker*" or "health staff*" or "healthcare professional*" or "healthcare worker*" or "healthcare staff*" or "health care professional*" or "health care worker*" or "health care professional*"):ti      |
| #5 | #1 or #2 or #3 or #4                                                                                                                                                                                                                                                                                                                        |
| #6 | MeSH descriptor: [Education] explode all trees                                                                                                                                                                                                                                                                                              |
| #7 | (train* or educat* or course* or workshop* or "staff development" or "professional development" or curriculum or curricula):ti OR (intervention* or program*):ti OR (((intervention8 or program*) N5 (train* or educat* or course* or workshop* or "staff development" or "professional development" or curriculum or curricula))):ti,ab,kw |
| #8 | #6 or #7                                                                                                                                                                                                                                                                                                                                    |
| #9 | #5 and #8                                                                                                                                                                                                                                                                                                                                   |

Winter R, Isa E, Roberts N, Norman RI, Howick J 2019

|     |                                                                                                                                                                                                                                                                                                                                                                                                                                                                                   |
|-----|-----------------------------------------------------------------------------------------------------------------------------------------------------------------------------------------------------------------------------------------------------------------------------------------------------------------------------------------------------------------------------------------------------------------------------------------------------------------------------------|
| #10 | ((physician* or doctor* or intern or interns or internship or resident* or residency or nurse* or "health professional*" or "health worker*" or "health staff*" or "healthcare professional*" or "healthcare worker*" or "healthcare staff*" or "health care professional*" or "health care worker*" or "health care professional*") NEAR/5 (train* or educat* or course? or workshop? or "staff development" or "professional development" or curriculum or curricula)):ti,ab,kw |
| #11 | #9 or #10                                                                                                                                                                                                                                                                                                                                                                                                                                                                         |
| #12 | MeSH descriptor: [Empathy] explode all trees                                                                                                                                                                                                                                                                                                                                                                                                                                      |
| #13 | (empath* or compassion*):ti,ab,kw                                                                                                                                                                                                                                                                                                                                                                                                                                                 |
| #14 | #11 and #13                                                                                                                                                                                                                                                                                                                                                                                                                                                                       |

eTable 2. Characteristics of excluded studies

| Study                 | Reason for exclusions                                                                                                                                                               |
|-----------------------|-------------------------------------------------------------------------------------------------------------------------------------------------------------------------------------|
| Arthur 2015           | Study protocol.                                                                                                                                                                     |
| Bonvicini 2008        | Observational data taken from an RCT. Intervention not specifically designed with outcome of change in empathy. Secondary analysis of data to see if there is an impact on empathy. |
| Bosse 2012            | Change in empathy not a specified outcome of study                                                                                                                                  |
| Bruera 2007           | Change in empathy not measured or intended outcome.                                                                                                                                 |
| Chen 2016             | Not an RCT. Quasi-experimental design, not randomised.                                                                                                                              |
| Chunharas 2013        | Not an RCT                                                                                                                                                                          |
| Daepfen 2012          | Change in empathy is not an intended outcome                                                                                                                                        |
| Danucalov 2017        | Empathy is not an intended outcome of the study. Participants not healthcare students or professionals.                                                                             |
| Delvaux 2005          | Change in empathy not an intended outcome and not measured                                                                                                                          |
| Downar 2016           | Change in empathy not an intended outcome                                                                                                                                           |
| Downar 2017           | Change in empathy is not an intended outcome of the study.                                                                                                                          |
| Dundas 2017           | Participants are not healthcare students/professionals.                                                                                                                             |
| Fallowfield 2002      | Empathy is not directly measured                                                                                                                                                    |
| Fine 1977             | Not an RCT                                                                                                                                                                          |
| Gibson 2013           | Change in empathy not an intended outcome                                                                                                                                           |
| Gorniewicz 2016       | Change in empathy not an intended outcome and is not measured                                                                                                                       |
| Hojat 2013            | Not an RCT. Experimental control groups without randomisation.                                                                                                                      |
| Jaury 2018            | Analysis of data already reported in RCT                                                                                                                                            |
| Johnson 2013          | Not an RCT. Controls selected from a waitlist group and intervention participants from a group who were due to undergo training in a set time-period.                               |
| Kahrman 2016          | Change in empathy is not intended outcome                                                                                                                                           |
| Klein 1999            | Change in empathy is not measured                                                                                                                                                   |
| Liao 2016             | Not an RCT. Quasi-experimental design                                                                                                                                               |
| Lienard 2010          | Change in empathy not an intended outcome                                                                                                                                           |
| Lim 2011              | Change in empathy not an intended outcome                                                                                                                                           |
| Little 2015           | Change in empathy not intended outcome of study and not specifically measured                                                                                                       |
| Misra-Herbert 2012    | Not an RCT                                                                                                                                                                          |
| Nasr Eshfahani 2014   | No control arm, comparison between two groups receiving same training, one as distant learning, one as attendants on course.                                                        |
| Nixon 2018            | Not an RCT. Quasi-experimental design "partial randomisation was conducted" with participants designated to their preference group                                                  |
| Oz 2001               | Not an RCT.                                                                                                                                                                         |
| Perula de Torres 2019 | Study protocol only                                                                                                                                                                 |
| Potash 2014           | No control arm "mixed-methods quantitative-qualitative study"                                                                                                                       |
| Rask 2009             | Empathy not measured as an outcome                                                                                                                                                  |
| Razavi 2002           | Change in empathy is not an intended outcome                                                                                                                                        |

Winter R, Isa E, Roberts N, Norman RI, Howick J 2019

|                  |                                                                                                                        |
|------------------|------------------------------------------------------------------------------------------------------------------------|
| Razavi 2003      | Empathy not explicitly measured as an outcome                                                                          |
| Rosenzweig 2016  | Not an RCT                                                                                                             |
| Roter 1995       | Unclear whether intervention is looking to cultivate empathy and whether change in empathy is an intended outcome      |
| Schroeder 2018   | Change in empathy is not an intended outcome of the study                                                              |
| Shapiro 2004     | Not an RCT                                                                                                             |
| Shapiro 2009     | Not an RCT                                                                                                             |
| Shapiro 2011     | Change in empathy is not an intended outcome                                                                           |
| Smith 1995       | Change in empathy is not intended outcome                                                                              |
| Tamura 2017      | Only available in Japanese                                                                                             |
| Van Dijk 2017    | Change in empathy is not an intended aim of the study                                                                  |
| Van Vilet 2017   | Not an RCT. Exploratory, controlled, quasi-experimental study using students not on a specific course as control group |
| Weatherdale 2018 | Correspondence and not research study                                                                                  |
| West 2014        | Change in empathy is not an intended outcome.                                                                          |

eTable 3. Characteristics of included studies

**Alhassan 2019**

|                      |                                                                                                                                                                                                                                                                                                                                                                                                    |
|----------------------|----------------------------------------------------------------------------------------------------------------------------------------------------------------------------------------------------------------------------------------------------------------------------------------------------------------------------------------------------------------------------------------------------|
| <b>Methods</b>       | Randomised controlled trial                                                                                                                                                                                                                                                                                                                                                                        |
| <b>Participants</b>  | The country of origin was Ghana.<br>104 students were randomised to the intervention group and 106 to the control group.<br>The inclusion criteria were nursing and midwifery students in their second year of training, above age 18 and available for follow-up data collection after 6 months.<br>The exclusion criteria included students not studying at Tamale Nursing and Midwifery College |
| <b>Interventions</b> | Communication Skills Training (CST) developed by author (MA) using 'Four Habits Model' and 'PCNF' (person-centred nursing framework).<br>The mode of delivery were small group discussions, brainstorming, personal experience from participants, group reports, roleplaying, questions and answers, videos and summaries. The duration was 2 days and frequency was one off.                      |
| <b>Outcomes</b>      | The outcome was empathy measured with JSE HPS version<br>Outcome assessment 2 days post intervention and 6 months post intervention                                                                                                                                                                                                                                                                |
| <b>Notes</b>         | -                                                                                                                                                                                                                                                                                                                                                                                                  |

**Risk of bias table**

| Bias                                                      | Authors' judgement | Support for judgement                                                                                                                                                                                                                                                                                         |
|-----------------------------------------------------------|--------------------|---------------------------------------------------------------------------------------------------------------------------------------------------------------------------------------------------------------------------------------------------------------------------------------------------------------|
| Random sequence generation (selection bias)               | Low risk           | "NMS were separated before random assignment to ensure that both professions were approximately equally represented in the groups"<br><br>"The researcher (MA) and research assistants conducted this by allowing participants to pick numbers written on papers, which had been randomly shuffled in a box." |
| Allocation concealment (selection bias)                   | Low risk           | "There was allocation concealment to the researcher, research assistants and the participants. The researcher (MA) and research assistants conducted this by allowing participants to pick numbers written on papers, which had been randomly shuffled in a box."                                             |
| Blinding of participants and personnel (performance bias) | High risk          | "The participants were made aware of empathy being an outcome of this study and since JSE is self-reported, it may have impacted their self-report."                                                                                                                                                          |
| Blinding of outcome assessment (detection bias)           | High risk          | "The participants were made aware of empathy being an outcome of this study and since JES is self-reported, it may have impacted their self-report."<br>"The data was analysed by the author (MA) without blinding."                                                                                          |
| Incomplete outcome data (attrition bias)                  | Low risk           | 11 participants in intervention group and 26 in control were excluded from analysis due to incomplete data or outcome measures not returned.                                                                                                                                                                  |

Winter R, Isa E, Roberts N, Norman RI, Howick J 2019

|                                      |          |                                     |
|--------------------------------------|----------|-------------------------------------|
| Selective reporting (reporting bias) | Low risk | Outcomes reported as pre-determined |
| Other bias                           | Low risk | No other bias detected              |

**Arthur 2017**

|                      |                                                                                                                                                                                                                                                                                                                                                                                                                                                                                                                                                                 |
|----------------------|-----------------------------------------------------------------------------------------------------------------------------------------------------------------------------------------------------------------------------------------------------------------------------------------------------------------------------------------------------------------------------------------------------------------------------------------------------------------------------------------------------------------------------------------------------------------|
| <b>Methods</b>       | Pilot cluster randomised controlled trial                                                                                                                                                                                                                                                                                                                                                                                                                                                                                                                       |
| <b>Participants</b>  | The country of origin was UK.<br>Clusters were wards within three acute hospital trusts in England. General medical, stroke or care of the elderly/older people wards were eligible. Specialist dementia wards and medical admissions units were excluded. Health Care Assistants (HCAs) employed full or part time within enrolled wards were eligible to enter trial. Bank staff and not part of the named staff on ward roster were ineligible.<br>In total 59 Health Care Assistants were randomised to the intervention group and 53 to the control group. |
| <b>Interventions</b> | 'Older People's Shoes' training intervention that focuses on relational care of older people. The mode of delivery was small group teaching led by nurses who had received full training in content and delivery of the intervention from a member of the research team. The setting was the hospital, the duration of the intervention was 2 weeks and frequency was 1 half day session for 2 consecutive days followed by a weeks break and then repeated.                                                                                                    |
| <b>Outcomes</b>      | HCA outcomes were empathy, as measured by The Toronto Empathy Questionnaire (TEQ) at baseline and post intervention at 8 and 12 weeks post randomisation.                                                                                                                                                                                                                                                                                                                                                                                                       |
| <b>Notes</b>         | -                                                                                                                                                                                                                                                                                                                                                                                                                                                                                                                                                               |

**Risk of bias table**

| Bias                                                      | Authors' judgement | Support for judgement                                                                                                                                                                                                                                                                          |
|-----------------------------------------------------------|--------------------|------------------------------------------------------------------------------------------------------------------------------------------------------------------------------------------------------------------------------------------------------------------------------------------------|
| Random sequence generation (selection bias)               | Low risk           | "Stratified by NHS hospital trust, wards were randomly allocated by the Norwich Clinical Trials Unit. Each ward had an equal chance of receiving either Older People's Shoes training for HCAs or TAU. Random allocation was generated via computer-written code using block sizes of four"    |
| Allocation concealment (selection bias)                   | Low risk           | "To conceal allocation from those responsible for recruitment, randomisation took place immediately after baseline measures were completed and 4 weeks ahead of the start of the intervention (set-up period) to allow appropriate arrangements, including HCA staffing cover to be arranged." |
| Blinding of participants and personnel (performance bias) | High risk          | "At a number of ward-based meetings during the 4-week baseline period, HCAs were given information about the study"                                                                                                                                                                            |
| Blinding of outcome assessment (detection bias)           | High risk          | Not described. Outcome measure is self-reported                                                                                                                                                                                                                                                |
| Incomplete outcome data (attrition bias)                  | High risk          | "For HCAs, completion of questionnaires was 72 out of 112 (64.2%) at baseline, 52 out of 112 (46.4%) at the first follow-up and 40 out of 112 (35.7%) at the second follow-up."                                                                                                                |
| Selective reporting (reporting bias)                      | Low risk           | Outcomes are reported as per methodology                                                                                                                                                                                                                                                       |
| Other bias                                                | Low risk           | Recruitment bias considered to be low risk: "Each ward had an equal chance of receiving either Older People's Shoes training for HCAs or TAU".                                                                                                                                                 |

**Blair Irvine 2012**

|                     |                                                                                                                                                                                                                                                                                                                                                                                                                                                                                                                                                                                        |
|---------------------|----------------------------------------------------------------------------------------------------------------------------------------------------------------------------------------------------------------------------------------------------------------------------------------------------------------------------------------------------------------------------------------------------------------------------------------------------------------------------------------------------------------------------------------------------------------------------------------|
| <b>Methods</b>      | Randomised controlled trial                                                                                                                                                                                                                                                                                                                                                                                                                                                                                                                                                            |
| <b>Participants</b> | The country of origin was the USA. 84 healthcare professionals were randomised to the intervention group and 88 to the control group.<br>Eligibility criteria included: identification of professional license from a pre-determined list, working in nursing home and assisted living settings<br>Exclusion criteria included: Working as Certified Nursing Assistant, Nursing Assistant, and Home Health Aide, working in a psychiatric/Alzheimer's care units and hospitals, working less than 20 hours per week, a 'moderate' or 'a lot' of self-reported level of mental illness, |

Winter R, Isa E, Roberts N, Norman RI, Howick J 2019

|                      |                                                                                                                                                                                                                                                                                                                                                                                                                                                                                                  |
|----------------------|--------------------------------------------------------------------------------------------------------------------------------------------------------------------------------------------------------------------------------------------------------------------------------------------------------------------------------------------------------------------------------------------------------------------------------------------------------------------------------------------------|
|                      | 'extremely confident' self-reported confidence to deal with resident behaviours associated with mental illness                                                                                                                                                                                                                                                                                                                                                                                   |
| <b>Interventions</b> | Online training designed to develop skills and confidence to deal with symptoms of whatever mental illness was causing a particular behaviour. The mental illness training approach included video modelling vignettes, right-way and wrong-way exemplars, testimonials and narration supplemented by short on-screen text designed to create empathy for residents with mental illness.<br>A minimum 'viewing time' for all online courses was 4 hours with two online 'visits' one week apart. |
| <b>Outcomes</b>      | Video situational testing (VST) was used to assess participant reactions to short video vignettes of resident behaviour. Four items in VST were used to assess participant empathy towards a resident.                                                                                                                                                                                                                                                                                           |
| <b>Notes</b>         | -                                                                                                                                                                                                                                                                                                                                                                                                                                                                                                |

**Risk of bias table**

| Bias                                                      | Authors' judgement | Support for judgement                                                                                                                                                                                                                                                                                                                                                                                                                                           |
|-----------------------------------------------------------|--------------------|-----------------------------------------------------------------------------------------------------------------------------------------------------------------------------------------------------------------------------------------------------------------------------------------------------------------------------------------------------------------------------------------------------------------------------------------------------------------|
| Random sequence generation (selection bias)               | Unclear risk       | No detail given on how randomisation occurred                                                                                                                                                                                                                                                                                                                                                                                                                   |
| Allocation concealment (selection bias)                   | Unclear risk       | No detail given on allocation of participant                                                                                                                                                                                                                                                                                                                                                                                                                    |
| Blinding of participants and personnel (performance bias) | High risk          | "After submitting the baseline assessment, treatment participants were e-mailed login information to the Internet training program for Visit 1. One week after logging on to the Visit 1 courses, each participant was sent a second e-mail with log-in information for Visit 2."                                                                                                                                                                               |
| Blinding of outcome assessment (detection bias)           | Unclear risk       | No detail given on how/who assessed video situational vignettes and whether outcome assessors were blinded                                                                                                                                                                                                                                                                                                                                                      |
| Incomplete outcome data (attrition bias)                  | Low risk           | "Of the 172 study participants 91% completed all three assessment surveys, 6% completed two surveys, and 3% completed one survey. Participants who completed all three surveys were compared to those who completed one or two surveys on study condition, demographic characteristics, and all baseline outcome measures. Attrition was not significantly related to any of the measures, which suggests that dropping out of the study did not bias results." |
| Selective reporting (reporting bias)                      | Low risk           | Outcomes reported as stated in methodology                                                                                                                                                                                                                                                                                                                                                                                                                      |
| Other bias                                                | Unclear risk       | "our measures of empathy and stigma did not provide an in-depth assessment of these constructs, nor is it clear what elements of the training were influential"                                                                                                                                                                                                                                                                                                 |

**Buffel Du Vaure 2017**

|                      |                                                                                                                                                                                                                                                                                     |
|----------------------|-------------------------------------------------------------------------------------------------------------------------------------------------------------------------------------------------------------------------------------------------------------------------------------|
| <b>Methods</b>       | Two site parallel group randomised controlled trial                                                                                                                                                                                                                                 |
| <b>Participants</b>  | The country of origin was France<br>176 fourth year medical students were randomised to the intervention group and 176 to the control group from two medical schools.<br>No exclusion criteria were stated.                                                                         |
| <b>Interventions</b> | Balint group training was the intervention with control conditions as 'teaching as usual'.<br>The intervention was delivered in small group discussions held at the university. The duration of the intervention was 10.5 hours delivered in 1.5-hour weekly sessions over 7 weeks. |
| <b>Outcomes</b>      | Empathy was assessed using the observer-rated CARE scale post intervention and JSPE student version self-rated scale pre and post intervention.                                                                                                                                     |
| <b>Notes</b>         | -                                                                                                                                                                                                                                                                                   |

Winter R, Isa E, Roberts N, Norman RI, Howick J 2019

**Risk of bias table**

| Bias                                                      | Authors' judgement | Support for judgement                                                                                                                                                                                                                                                                                                                                                                                              |
|-----------------------------------------------------------|--------------------|--------------------------------------------------------------------------------------------------------------------------------------------------------------------------------------------------------------------------------------------------------------------------------------------------------------------------------------------------------------------------------------------------------------------|
| Random sequence generation (selection bias)               | Low risk           | "Students from Paris Diderot were randomized with a simple randomization using computer generated random numbers"<br><br>"students from Paris Descartes, we took advantage of the randomization routinely performed each year by university staff to allocate each student to one of three groups, each corresponding to a particular order of the three mandatory 3-month programs of the fourth-year curriculum" |
| Allocation concealment (selection bias)                   | Unclear risk       | "students from Paris Descartes, we took advantage of the randomization routinely performed each year by university staff to allocate each student to one of three groups, each corresponding to a particular order of the three mandatory 3-month programs of the fourth-year curriculum"                                                                                                                          |
| Blinding of participants and personnel (performance bias) | High risk          | "Participants in the intervention group received a training of 7 sessions of 1.5 hour Balint groups, over 3 months"                                                                                                                                                                                                                                                                                                |
| Blinding of outcome assessment (detection bias)           | Unclear risk       | Outcome assessed both by observer and self.<br>"Whereas students and facilitators were aware of the allocated group, standardized patients, OSCE's observers and data analysts were kept blinded to the allocation". Self-assessment for JSPE so unable to blind outcome assessors (students themselves)                                                                                                           |
| Incomplete outcome data (attrition bias)                  | Low risk           | 52 lost to follow up but study over recruited to ensure significance level of 5% and power of 80%.<br>14.7% attrition (21 intervention and 32 controls)                                                                                                                                                                                                                                                            |
| Selective reporting (reporting bias)                      | Low risk           | Primary and secondary outcomes reported as stated in the methods                                                                                                                                                                                                                                                                                                                                                   |
| Other bias                                                | Low risk           | No other bias detected                                                                                                                                                                                                                                                                                                                                                                                             |

**Butow 2007**

|                      |                                                                                                                                                                                                                                                                                                                                                                                |
|----------------------|--------------------------------------------------------------------------------------------------------------------------------------------------------------------------------------------------------------------------------------------------------------------------------------------------------------------------------------------------------------------------------|
| <b>Methods</b>       | Randomised controlled trial                                                                                                                                                                                                                                                                                                                                                    |
| <b>Participants</b>  | The country of origin was Australia.<br>16 medical and radiation oncologists were randomised to the intervention group and 14 to the control group.<br>All medical and radiation oncologists from six tertiary care hospitals in six Australian cities which incorporated oncology outpatient clinics were invited to participate in the study<br>No exclusion criteria stated |
| <b>Interventions</b> | Communication skills training was an intensive face-to-face workshop incorporating presentation of principles, a DVD modelling ideal behaviour and role-play practice, followed by four 1.5 hour monthly video-conferences incorporating role-play of doctor-generated scenarios.                                                                                              |
| <b>Outcomes</b>      | The outcome was a change in doctor behaviour in eliciting and responding to emotional cues in patients and was measured via coding of a transcript from a filmed role-play at baseline, after completing the training and at 12 months post intervention.                                                                                                                      |
| <b>Notes</b>         | No funding source stated                                                                                                                                                                                                                                                                                                                                                       |

**Risk of bias table**

| Bias                                        | Authors' judgement | Support for judgement                                                                                                                                                                                                                                                                                                                                                                                      |
|---------------------------------------------|--------------------|------------------------------------------------------------------------------------------------------------------------------------------------------------------------------------------------------------------------------------------------------------------------------------------------------------------------------------------------------------------------------------------------------------|
| Random sequence generation (selection bias) | Low risk           | "oncologists individually randomised immediately after giving consent and baseline data collection, to receive the training or not. Oncologists were stratified by hospital to ensure approximately equal numbers in the control and intervention arms within each institution, and then randomised within permuted blocks of size 6 constructed by the central research team using a random number table" |



Winter R, Isa E, Roberts N, Norman RI, Howick J 2019

|                                                           |              |                                                                                                                                                                                                                                                                                                                                                                 |
|-----------------------------------------------------------|--------------|-----------------------------------------------------------------------------------------------------------------------------------------------------------------------------------------------------------------------------------------------------------------------------------------------------------------------------------------------------------------|
| Allocation concealment (selection bias)                   | Low risk     | "oncologists individually randomised immediately after giving consent and baseline data collection, to receive the training or not."                                                                                                                                                                                                                            |
| Blinding of participants and personnel (performance bias) | High risk    | "Control group doctors were offered training at the completion of the study."<br><br>"It is possible that intervention doctors shared some study materials with control doctors although they were strictly instructed not to do so"<br><br>"all doctors were aware that they were being assessed, which likely motivated them to be on 'their best behaviour'" |
| Blinding of outcome assessment (detection bias)           | Unclear risk | Does not state whether assessors were blinded                                                                                                                                                                                                                                                                                                                   |
| Incomplete outcome data (attrition bias)                  | Unclear risk | Two controls and two intervention participants lost to follow-up. 11.4% overall attrition                                                                                                                                                                                                                                                                       |
| Selective reporting (reporting bias)                      | Low risk     | Outcomes reported as stated in methodology                                                                                                                                                                                                                                                                                                                      |
| Other bias                                                | High risk    | Baseline imbalance:<br><br>"EE and DP scores were significantly higher in the intervention group compared to the control group at baseline".                                                                                                                                                                                                                    |

**Collins 2017**

|                      |                                                                                                                                                                                                                                                                                                                                                                                                     |
|----------------------|-----------------------------------------------------------------------------------------------------------------------------------------------------------------------------------------------------------------------------------------------------------------------------------------------------------------------------------------------------------------------------------------------------|
| <b>Methods</b>       | Randomised controlled trial                                                                                                                                                                                                                                                                                                                                                                         |
| <b>Participants</b>  | The country of origin was USA<br>13 student pharmacists were randomised to the intervention group and 12 to the control group.<br>First through to third year pharmacist students invited to participate. No exclusion criteria stated                                                                                                                                                              |
| <b>Interventions</b> | Students randomized to the literature intervention group were then sent a weekly email that included the reading assignment. Reading assignments were divided into three segments (approximately three to five minutes apiece), and students were requested to complete the readings in three separate sittings throughout the week.<br>The intervention duration was 8 weeks with weekly sessions. |
| <b>Outcomes</b>      | A change in empathy was measured using the JSE-HPS two weeks post end of the intervention.                                                                                                                                                                                                                                                                                                          |
| <b>Notes</b>         | -                                                                                                                                                                                                                                                                                                                                                                                                   |

**Risk of bias table**

| Bias                                                      | Authors' judgement | Support for judgement                                                                                                   |
|-----------------------------------------------------------|--------------------|-------------------------------------------------------------------------------------------------------------------------|
| Random sequence generation (selection bias)               | Unclear risk       | "Participants were randomized into either an intervention or control group."<br>No detail of how randomisation occurred |
| Allocation concealment (selection bias)                   | Unclear risk       | No details given                                                                                                        |
| Blinding of participants and personnel (performance bias) | High risk          | "The announcement was then followed by an email further explaining the study and inviting students to participate."     |
| Blinding of outcome assessment (detection bias)           | Unclear risk       | No details given. However, outcome assessment is self-assessed by participants and participants not blinded.            |
| Incomplete outcome data (attrition bias)                  | Low risk           | Overall attrition rate 16%. (15.4% for intervention group, 16.7% for control group dropout rate)                        |
| Selective reporting (reporting bias)                      | Low risk           | Outcomes reported as stated in results                                                                                  |
| Other bias                                                | Low risk           | No other bias detected                                                                                                  |

Winter R, Isa E, Roberts N, Norman RI, Howick J 2019

**Daniels 1998**

|                      |                                                                                                                                                                                                                                                                                                                                                              |
|----------------------|--------------------------------------------------------------------------------------------------------------------------------------------------------------------------------------------------------------------------------------------------------------------------------------------------------------------------------------------------------------|
| <b>Methods</b>       | Randomised controlled trial                                                                                                                                                                                                                                                                                                                                  |
| <b>Participants</b>  | The country of origin was Canada<br>53 full-time second year nursing students were randomly allocated to either the intervention or control group.<br>Full-time second year female students in a two-year, eight-month registered nurse (RN) diploma program. Males not excluded from study randomisation but were excluded from analysis.                   |
| <b>Interventions</b> | Micro-counselling training divided into six segments with one micro-skill taught per segment including attending behaviour, questioning, minimal encouragers, paraphrasing, reflection of feeling and summarizing.<br>The intervention was delivered face-to-face and training was divided into 6 segments of 3-5 hours with a minimum of 18 hours training. |
| <b>Outcomes</b>      | The Empathy Construct Rating Scale and The Carkhuff Index of Communication (Empathy) self-rated scales were administered to assess changes in empathy post intervention.                                                                                                                                                                                     |
| <b>Notes</b>         | No details on funding source given.                                                                                                                                                                                                                                                                                                                          |

**Risk of bias table**

| <b>Bias</b>                                               | <b>Authors' judgement</b> | <b>Support for judgement</b>                                                                                                                                                                                                                                                         |
|-----------------------------------------------------------|---------------------------|--------------------------------------------------------------------------------------------------------------------------------------------------------------------------------------------------------------------------------------------------------------------------------------|
| Random sequence generation (selection bias)               | Unclear risk              | "Subjects were randomly assigned to either an experimental group or a non-attention control group."<br><br>No details of how random sequence generated                                                                                                                               |
| Allocation concealment (selection bias)                   | Unclear risk              | "Subjects were randomly assigned to either an experimental group or a non-attention control group."<br><br>No details on allocation of students to experimental/control                                                                                                              |
| Blinding of participants and personnel (performance bias) | High risk                 | "During the period of micro-counselling training of the experimental subjects, the control subjects were non-attended. Essentially, the control subjects spent this period of time entirely on their own and received no supervision or structured training experience of any kind." |
| Blinding of outcome assessment (detection bias)           | High risk                 | No details given of blinding outcome assessors however outcome assessment is self-assessment                                                                                                                                                                                         |
| Incomplete outcome data (attrition bias)                  | Unclear risk              | "The sample consists of all full-time second year female students (n=60). In all, there are 56 females and 4 males. The males were dropped from the analysis and there was a further attrition of three subjects."                                                                   |
| Selective reporting (reporting bias)                      | High risk                 | The males were dropped from the analysis and there was a further attrition of three subjects                                                                                                                                                                                         |
| Other bias                                                | Unclear risk              | No results tables/figures published for the 9-month follow-up data ("At the nine-month follow-up period, the experimental group performed better on all the dependent measures than the control group. However, these differences failed to reach statistical significance")         |

**Foster 2016**

|                      |                                                                                                                                                                                                                                                                                                                                                                                                                                                    |
|----------------------|----------------------------------------------------------------------------------------------------------------------------------------------------------------------------------------------------------------------------------------------------------------------------------------------------------------------------------------------------------------------------------------------------------------------------------------------------|
| <b>Methods</b>       | Randomised controlled trial                                                                                                                                                                                                                                                                                                                                                                                                                        |
| <b>Participants</b>  | The country of origin was USA.<br>35 and 18 medical students were allocated to 2 intervention arms and 17 to a control arm.                                                                                                                                                                                                                                                                                                                        |
| <b>Interventions</b> | Student engagement with a virtual patient (VP). Students interacted with VP online test-based interface. They conducted interviews as they would with live patients, but typed what they wanted to say rather than speaking. The three arms to the study consisted of:<br>-The empathy-feedback VP: Human-assisted empathy feedback is a technique where human 'assessors' anonymously follow online the trainee's interaction with the VP in real |

Winter R, Isa E, Roberts N, Norman RI, Howick J 2019

|                 |                                                                                                                                                                                                                                                                                                                                                                                                                                                                                               |
|-----------------|-----------------------------------------------------------------------------------------------------------------------------------------------------------------------------------------------------------------------------------------------------------------------------------------------------------------------------------------------------------------------------------------------------------------------------------------------------------------------------------------------|
|                 | time. The assessors' feedback about opportunities to express empathy was available to students for review at the end of the VP interaction<br>-The Backstory VP: Combines embodied conversational agents and narrative video vignettes. When specific questions are asked of the VP, noninteractive video vignettes are presented which show scenes of the VP illustrating their condition.<br>-Control VP: Provides typed interaction with VP without empathy feedback or patient backstory. |
| <b>Outcomes</b> | The primary outcome was to assess students' verbal responses to all the opportunities to show empathy presented to them by the simulated patients. The Empathic Communication Encoding System (ECCS) (developed to code empathic opportunities, defined as an explicit, clear and direct statement of emotion, progress or challenge by the patient) was used to assess empathy.                                                                                                              |
| <b>Notes</b>    | -                                                                                                                                                                                                                                                                                                                                                                                                                                                                                             |

**Risk of bias table**

| <b>Bias</b>                                               | <b>Authors' judgement</b> | <b>Support for judgement</b>                                                                                                                                                                                                                                                                                                                                                                                                                               |
|-----------------------------------------------------------|---------------------------|------------------------------------------------------------------------------------------------------------------------------------------------------------------------------------------------------------------------------------------------------------------------------------------------------------------------------------------------------------------------------------------------------------------------------------------------------------|
| Random sequence generation (selection bias)               | High risk                 | "Students were randomized into one of three groups." No detail on random sequence generation given.                                                                                                                                                                                                                                                                                                                                                        |
| Allocation concealment (selection bias)                   | Unclear risk              | No detail on allocation given.                                                                                                                                                                                                                                                                                                                                                                                                                             |
| Blinding of participants and personnel (performance bias) | Unclear risk              | "The (VP) assessors were not aware of the students' identity or study group assignment and could not see the students, and the students were not aware of the assessors' presence"                                                                                                                                                                                                                                                                         |
| Blinding of outcome assessment (detection bias)           | Low risk                  | "The (VP) assessors were not aware of the students' identity or study group assignment and could not see the students, and the students were not aware of the assessors' presence."<br><br>"Measures were taken to label the transcripts (of SP interactions) in each study group such that the source of the transcript was not identifiable to the assessors"<br><br>"The SPs (standardised patients) were blinded to students' study group assignment." |
| Incomplete outcome data (attrition bias)                  | Low risk                  | No attrition reported. N=70 randomised and n=70 analysed                                                                                                                                                                                                                                                                                                                                                                                                   |
| Selective reporting (reporting bias)                      | Unclear risk              | Study outcomes reported as stated in methodology                                                                                                                                                                                                                                                                                                                                                                                                           |
| Other bias                                                | Low risk                  | No other bias detected                                                                                                                                                                                                                                                                                                                                                                                                                                     |

**Gholamzadeh 2018**

|                      |                                                                                                                                                                                                                                                                                                                                                                                                                                                                                                     |
|----------------------|-----------------------------------------------------------------------------------------------------------------------------------------------------------------------------------------------------------------------------------------------------------------------------------------------------------------------------------------------------------------------------------------------------------------------------------------------------------------------------------------------------|
| <b>Methods</b>       | Quasi-experimental randomised controlled design                                                                                                                                                                                                                                                                                                                                                                                                                                                     |
| <b>Participants</b>  | The country of origin was Iran<br>63 third and fourth year medical students were allocated to either the control or intervention group.<br>The inclusion criteria of the study were willingness to participate, being a third- or fourth-year nursing student, and not having taken any empathy courses in the past 6 months. In case the students were unwilling to continue participation in the study or were participating in another educational program at the same time, they were excluded. |
| <b>Interventions</b> | Workshop on empathy skills including self-awareness, and definition and examples of empathy towards patients.<br>The intervention consisted of an 8-hour workshop on empathy skills that was held at the college for 2 days. The content of the workshop was designed by the researchers and reviewed and revised by some of the college professors. The workshop was mainly based on constructivist learning theory.                                                                               |
| <b>Outcomes</b>      | The JSE-HP self-rating scale was used to examine the effects of empathy skills training immediately and 2 months after the intervention.                                                                                                                                                                                                                                                                                                                                                            |

Winter R, Isa E, Roberts N, Norman RI, Howick J 2019

|              |   |
|--------------|---|
| <b>Notes</b> | - |
|--------------|---|

**Risk of bias table**

| Bias                                                      | Authors' judgement | Support for judgement                                                                                                                                                |
|-----------------------------------------------------------|--------------------|----------------------------------------------------------------------------------------------------------------------------------------------------------------------|
| Random sequence generation (selection bias)               | Low risk           | "the 70 students were randomly divided into a control and an intervention group through block randomization."                                                        |
| Allocation concealment (selection bias)                   | Unclear risk       | "the 70 students were randomly divided into a control and an intervention group through block randomization." No details of allocation to groups post randomisation. |
| Blinding of participants and personnel (performance bias) | High risk          | "All students in the intervention group participated in the same workshop. The students were informed about the date of the workshop in advance."                    |
| Blinding of outcome assessment (detection bias)           | High risk          | Self-rated questionnaire (outcome assessor is participant)                                                                                                           |
| Incomplete outcome data (attrition bias)                  | Low risk           | All participants randomised completed the study                                                                                                                      |
| Selective reporting (reporting bias)                      | High risk          | Outcomes not specifically stated in methodology.                                                                                                                     |
| Other bias                                                | Low risk           | No other bias detected                                                                                                                                               |

**Gould 2017**

|                      |                                                                                                                                                                                                                                                                            |
|----------------------|----------------------------------------------------------------------------------------------------------------------------------------------------------------------------------------------------------------------------------------------------------------------------|
| <b>Methods</b>       | Multi-site pilot randomised controlled trial (as part of a wider feasibility study)                                                                                                                                                                                        |
| <b>Participants</b>  | Six ward teams were randomised to either intervention or control groups with a total of 168 nursing staff randomised to the intervention group and 81 to the control group. Medical and surgical wards with high proportion of older patients were eligible.               |
| <b>Interventions</b> | The Creating Learning Environments for Compassionate Care (CLECC): educational programme focused on developing manager and team practices at a group level that create an expansive learning environment, theorised to enhance team capacity to provide compassionate care |
| <b>Outcomes</b>      | Nurses' self-reported empathy was measured using the Jefferson Scale of Empathy (JSE) (Physician/HP version).                                                                                                                                                              |
| <b>Notes</b>         | -                                                                                                                                                                                                                                                                          |

**Risk of bias table**

| Bias                                                      | Authors' judgement | Support for judgement                                                                                                                                                                                    |
|-----------------------------------------------------------|--------------------|----------------------------------------------------------------------------------------------------------------------------------------------------------------------------------------------------------|
| Random sequence generation (selection bias)               | Low risk           | "Randomisation of clusters was undertaken using the ralloc command in Stata (Release 12, StataCorp) by the team statistician (IM-E) blinded to hospital and ward information other than ward specialty." |
| Allocation concealment (selection bias)                   | Low risk           | "Procedures for allocation concealment and blinding proceeded as planned, with the exception of two researcher observers at follow-up reporting that they learnt of ward allocation from ward staff."    |
| Blinding of participants and personnel (performance bias) | High risk          | "It was not possible to conceal allocation from ward team nursing staff. Patients were not informed of allocation."                                                                                      |
| Blinding of outcome assessment (detection bias)           | High risk          | Empathy measurement is self-rated questionnaire so unable to blind outcome assessor<br><br>Researchers gathering questionnaire data were aware of ward allocation.                                       |
| Incomplete outcome data (attrition bias)                  | High risk          | No attrition of wards during the study                                                                                                                                                                   |
| Selective reporting (reporting bias)                      | High risk          | No data reported on JSE other than: "There was no significant difference between groups (P=0.800)"                                                                                                       |
| Other bias                                                | Unclear risk       | Baseline demographic and baseline measurement difference not fully reported for JSE.                                                                                                                     |

Winter R, Isa E, Roberts N, Norman RI, Howick J 2019

|  |  |                                                                                                                                                                                                                                                                                                                                                                                                                                                                                                                              |
|--|--|------------------------------------------------------------------------------------------------------------------------------------------------------------------------------------------------------------------------------------------------------------------------------------------------------------------------------------------------------------------------------------------------------------------------------------------------------------------------------------------------------------------------------|
|  |  | Recruitment bias low risk: Six wards in two NHS hospital Trusts in England were enrolled and allocated to intervention (n=4) or control (n=2). The number of clusters was determined by funding availability and the plan to run the study in at least two hospital organisations, and at least two ward specialties. Randomisation of clusters was undertaken using the ralloc command in Stata (Release 12, StataCorp) by the team statistician (IM-E) blinded to hospital and ward information other than ward specialty. |
|--|--|------------------------------------------------------------------------------------------------------------------------------------------------------------------------------------------------------------------------------------------------------------------------------------------------------------------------------------------------------------------------------------------------------------------------------------------------------------------------------------------------------------------------------|

**Hastings 2018**

|                      |                                                                                                                                                                                                                                                                                                                                                                                                                                                                                                                                                                                                                                                                                                                                                                                                                                                                                                                                            |
|----------------------|--------------------------------------------------------------------------------------------------------------------------------------------------------------------------------------------------------------------------------------------------------------------------------------------------------------------------------------------------------------------------------------------------------------------------------------------------------------------------------------------------------------------------------------------------------------------------------------------------------------------------------------------------------------------------------------------------------------------------------------------------------------------------------------------------------------------------------------------------------------------------------------------------------------------------------------------|
| <b>Methods</b>       | Cluster randomised controlled trial                                                                                                                                                                                                                                                                                                                                                                                                                                                                                                                                                                                                                                                                                                                                                                                                                                                                                                        |
| <b>Participants</b>  | 118 residential care settings for people with intellectual disability (with a total of 236 staff) were randomised to either the intervention or control group.<br>Residential settings were eligible for inclusion if: they were based in a community setting, provided services via publicly funded contracts, supported between one and 10 people with ID, employed staff who provided at least some 24-h support, provided care for at least one person with ID who displayed aggressive CB, could identify one manager/lead staff member and one other support staff member who could attend WCW training together.<br>Staff were eligible for inclusion if: they were either a manager (or lead staff member as defined by the service provider organisation) or a direct support worker whose roles were no more than 50% administrative/management.<br>Staff who worked less than 70% of full-time equivalent were also ineligible. |
| <b>Interventions</b> | WCW (Who's challenging who) training course for support staff in ID context covering communication, frustrations of people with CB (challenging behaviours), experience of being physically restrained, medication, feeling excluded and unhelpful attitudes and behaviour or support staff).<br>The intervention was delivered in small group facilitated learning sessions by trained trainers. It was delivered in a one off half day session.                                                                                                                                                                                                                                                                                                                                                                                                                                                                                          |
| <b>Outcomes</b>      | The Staff Empathy for people with Challenging Behaviour Questionnaire (SECBQ) was used to measure staff self-reported empathy at baseline and at 6 weeks and 20 weeks post randomisation.                                                                                                                                                                                                                                                                                                                                                                                                                                                                                                                                                                                                                                                                                                                                                  |
| <b>Notes</b>         | -                                                                                                                                                                                                                                                                                                                                                                                                                                                                                                                                                                                                                                                                                                                                                                                                                                                                                                                                          |

**Risk of bias table**

| Bias                                                      | Authors' judgement | Support for judgement                                                                                                                                                                                                                                                |
|-----------------------------------------------------------|--------------------|----------------------------------------------------------------------------------------------------------------------------------------------------------------------------------------------------------------------------------------------------------------------|
| Random sequence generation (selection bias)               | Low risk           | "Randomisation occurred at one point in time for each phase, was carried out by a study-independent statistician from the Centre for Trials Research and used a dynamic balancing algorithm specifically designed for cluster randomised trials"                     |
| Allocation concealment (selection bias)                   | Low risk           | The trial statistician remained blind to allocation up until the point of data analysis.                                                                                                                                                                             |
| Blinding of participants and personnel (performance bias) | High risk          | "Settings, and staff members within them, could not be masked to the intervention but were recruited prior to randomisation."                                                                                                                                        |
| Blinding of outcome assessment (detection bias)           | High risk          | Self-reported outcomes to measure empathy                                                                                                                                                                                                                            |
| Incomplete outcome data (attrition bias)                  | High risk          | Intervention group:<br>77% received intervention<br>6 week follow up 44.1%<br>20 week follow up 48.3%                                                                                                                                                                |
| Selective reporting (reporting bias)                      | Low risk           | Outcomes reported as per methodology                                                                                                                                                                                                                                 |
| Other bias                                                | Low risk           | Recruitment bias low: Randomisation occurred at one point in time for each phase, was carried out by a study-independent statistician from the Centre for Trials Research and used a dynamic balancing algorithm specifically designed for cluster randomised trials |

Winter R, Isa E, Roberts N, Norman RI, Howick J 2019

|  |                                                                                                |
|--|------------------------------------------------------------------------------------------------|
|  | No evidence that further residential settings were added to the trial following randomisation. |
|--|------------------------------------------------------------------------------------------------|

#### Hattink 2015

|                      |                                                                                                                                                                                                                                                                                                                                                                                                                                                                                                                                                                                                                                                                                                        |
|----------------------|--------------------------------------------------------------------------------------------------------------------------------------------------------------------------------------------------------------------------------------------------------------------------------------------------------------------------------------------------------------------------------------------------------------------------------------------------------------------------------------------------------------------------------------------------------------------------------------------------------------------------------------------------------------------------------------------------------|
| <b>Methods</b>       | Randomised controlled trial                                                                                                                                                                                                                                                                                                                                                                                                                                                                                                                                                                                                                                                                            |
| <b>Participants</b>  | The countries of origin were UK and the Netherlands.<br>142 care givers (informal or professional) were randomised to the intervention or control group. 24 were professional care givers.<br>Participants who fulfilled the following criteria were recruited for the evaluation study: (1) were sufficiently computer literate to utilize the STAR website and (2) were currently an informal caregiver for someone with dementia living in the community, or a volunteer working with people with dementia with direct contact with community-dwelling people with dementia, or a professional caregiver for people with dementia with direct contact with community-dwelling people with dementia. |
| <b>Interventions</b> | STAR training portal, a Web-based portal consisting of 8 modules, 2 of which had a basic level and 6 additional modules at intermediate and advanced levels about dementia care. In addition, users had access to online peer and expert communities for support and information exchange.<br>Up to 4 months to complete on-line training modules at participants own pace.                                                                                                                                                                                                                                                                                                                            |
| <b>Outcomes</b>      | The Interpersonal Reactivity Index (IRI) was used to measure empathy pre and post intervention (empathy was measured as a secondary outcome) with changes to knowledge about dementia and attitudes to it being primary outcomes.                                                                                                                                                                                                                                                                                                                                                                                                                                                                      |
| <b>Notes</b>         | -                                                                                                                                                                                                                                                                                                                                                                                                                                                                                                                                                                                                                                                                                                      |

#### Risk of bias table

| Bias                                                      | Authors' judgement | Support for judgement                                                                                                                                                                                                                                                                                                                                                                                                                                                            |
|-----------------------------------------------------------|--------------------|----------------------------------------------------------------------------------------------------------------------------------------------------------------------------------------------------------------------------------------------------------------------------------------------------------------------------------------------------------------------------------------------------------------------------------------------------------------------------------|
| Random sequence generation (selection bias)               | Low risk           | "Randomization software was used to classify participants into either the experimental or control group."                                                                                                                                                                                                                                                                                                                                                                        |
| Allocation concealment (selection bias)                   | Low risk           | "Randomization software was used to classify participants into either the experimental or control group"                                                                                                                                                                                                                                                                                                                                                                         |
| Blinding of participants and personnel (performance bias) | High risk          | "Participants in the experimental group received a link to the STAR registration"<br><br>"People in the control group were informed that they were assigned to the group that could follow the course free of charge after post-test measurements 4 months later."                                                                                                                                                                                                               |
| Blinding of outcome assessment (detection bias)           | High risk          | Self-rated instrument used to measure empathy                                                                                                                                                                                                                                                                                                                                                                                                                                    |
| Incomplete outcome data (attrition bias)                  | High risk          | "During the pilot, 59 participants dropped out. The total response at post-test was 61%. Reasons for dropouts in the Netherlands (n=29) were no time (n=4) or unknown (n=25; no response to repeated emails of researchers to remind them of filling in the questionnaires). Reasons for dropouts in the United Kingdom (n=30) were no time (n=1), no computer at home (n=1), or unknown (n=28; no response to repeated requests by researchers to fill in the questionnaires)." |
| Selective reporting (reporting bias)                      | Low risk           | Outcomes reported as per methodology                                                                                                                                                                                                                                                                                                                                                                                                                                             |
| Other bias                                                | Low risk           | No other bias detected                                                                                                                                                                                                                                                                                                                                                                                                                                                           |

#### Larti 2018

|                     |                                                                                                                                   |
|---------------------|-----------------------------------------------------------------------------------------------------------------------------------|
| <b>Methods</b>      | Comparative study with random allocation to control and intervention groups.                                                      |
| <b>Participants</b> | The country of origin was Iran<br>82 operating room nursing students were randomised to either the intervention or control group. |

Winter R, Isa E, Roberts N, Norman RI, Howick J 2019

|                      |                                                                                                                                                                                                                                                                                                                                                                                                                                                                        |
|----------------------|------------------------------------------------------------------------------------------------------------------------------------------------------------------------------------------------------------------------------------------------------------------------------------------------------------------------------------------------------------------------------------------------------------------------------------------------------------------------|
|                      | Inclusion criteria: second-semester or higher students who had entered the stage of clinical practice, had experience with communicating with patients, had not been diagnosed with any psychological conditions, and had no history of participation in communication or patient empathy workshops<br>The exclusion criteria included incomplete responses to questionnaires, absence at any of the training sessions, and withdrawal from continuation of the study. |
| <b>Interventions</b> | Training programme for empathetic communication with patients in the operating room, mainly during the perioperative phase, using role-playing technique. The training was delivered face-to-face by the researchers with assistance from psychologists specialising in running empathy workshops. The duration of training was 12 hours delivered in 3 x 4 hour sessions with weekly sessions over 3 weeks.                                                           |
| <b>Outcomes</b>      | The purpose of this study was to investigate the effects of a role-playing training program for empathetic communication with patients on the empathy scores of operating room nursing students. The JSE-HPS was used to measure self-rated empathy pre and one month post intervention.                                                                                                                                                                               |
| <b>Notes</b>         | -                                                                                                                                                                                                                                                                                                                                                                                                                                                                      |

**Risk of bias table**

| Bias                                                      | Authors' judgement | Support for judgement                                                                                                                                                                                                                                                                                 |
|-----------------------------------------------------------|--------------------|-------------------------------------------------------------------------------------------------------------------------------------------------------------------------------------------------------------------------------------------------------------------------------------------------------|
| Random sequence generation (selection bias)               | Low risk           | "A number was then randomly assigned to each of the students, and the numbers were poured into a bowl. The first paper drawn out of the bowl was for the experimental group, the second paper was for the control group, and this procedure was continued to select students from all years of study" |
| Allocation concealment (selection bias)                   | Low risk           | "A number was then randomly assigned to each of the students, and the numbers were poured into a bowl. The first paper drawn out of the bowl was for the experimental group, the second paper was for the control group, and this procedure was continued to select students from all years of study" |
| Blinding of participants and personnel (performance bias) | High risk          | "The objectives of the training program were then explained"                                                                                                                                                                                                                                          |
| Blinding of outcome assessment (detection bias)           | High risk          | Self-assessment so no blinding of outcome assessor                                                                                                                                                                                                                                                    |
| Incomplete outcome data (attrition bias)                  | Low risk           | Low attrition rate (6%)                                                                                                                                                                                                                                                                               |
| Selective reporting (reporting bias)                      | Low risk           | No other bias detected                                                                                                                                                                                                                                                                                |
| Other bias                                                | Unclear risk       |                                                                                                                                                                                                                                                                                                       |

**Lobchuck 2018**

|                      |                                                                                                                                                                                                                                                                                                                                                                                                                                                                                                                                        |
|----------------------|----------------------------------------------------------------------------------------------------------------------------------------------------------------------------------------------------------------------------------------------------------------------------------------------------------------------------------------------------------------------------------------------------------------------------------------------------------------------------------------------------------------------------------------|
| <b>Methods</b>       | Two centre randomised controlled pilot study                                                                                                                                                                                                                                                                                                                                                                                                                                                                                           |
| <b>Participants</b>  | The country of origin was Canada<br>25 nursing students were allocated to the intervention group and 19 to the control group. Students at: (a) the end of the second year or in the third year of a three-year accelerated baccalaureate program at the college or (b) the end of the second year or in the third or fourth year of a four-year baccalaureate program at the university were included.<br>No exclusion criteria listed.                                                                                                |
| <b>Interventions</b> | Heart Health Whispering intervention was delivered as a novel person-centered approach for counselling and health promotion. The training programme on perspective taking involved 4 phases. Phase 1 – individual teaching on perspective taking followed by 2 week period and instructions to practice skills. Phase 2 10 minute videoed conversation with actor. Phase 3, researcher and actor watch video and 'video-tag' thoughts and feelings actor remembered having experienced, shared, displayed etc. Phase 4 exit interviews |
| <b>Outcomes</b>      | Empathy post intervention was assessed using the CARE scale completed by observer<br>An adapted version of the CARE scale was also completed by the participant to capture their inference of the actors response to his or her clinical empathy.                                                                                                                                                                                                                                                                                      |
| <b>Notes</b>         | -                                                                                                                                                                                                                                                                                                                                                                                                                                                                                                                                      |

Winter R, Isa E, Roberts N, Norman RI, Howick J 2019

**Risk of bias table**

| Bias                                                      | Authors' judgement | Support for judgement                                                                                                                |
|-----------------------------------------------------------|--------------------|--------------------------------------------------------------------------------------------------------------------------------------|
| Random sequence generation (selection bias)               | Low risk           | "The Research Assistant (RA) conducted a computerized randomization process to assign students to Group I (n=24) or Group PI (n=18)" |
| Allocation concealment (selection bias)                   | Unclear risk       | Not reported                                                                                                                         |
| Blinding of participants and personnel (performance bias) | High risk          | "Due to practical reasons, students, the interventionist (JL), and interviewers (ML and LH) were not blinded"                        |
| Blinding of outcome assessment (detection bias)           | Unclear risk       | Mixed<br>High – self reported measure of empathy (JSE)<br>Low – observer reported - actor was blinded to group assignment.           |
| Incomplete outcome data (attrition bias)                  | Low risk           | Low attrition rate 5%                                                                                                                |
| Selective reporting (reporting bias)                      | Unclear risk       | Outcomes reported as per methodology                                                                                                 |
| Other bias                                                | Unclear risk       | Baseline demographic differences not reported                                                                                        |

**Lor 2014**

|                      |                                                                                                                                                                                                                                                                                                                                                                                                                                                 |
|----------------------|-------------------------------------------------------------------------------------------------------------------------------------------------------------------------------------------------------------------------------------------------------------------------------------------------------------------------------------------------------------------------------------------------------------------------------------------------|
| <b>Methods</b>       | Randomised controlled trial                                                                                                                                                                                                                                                                                                                                                                                                                     |
| <b>Participants</b>  | The country of origin was USA<br>40 student pharmacists were randomised to either the intervention or the control group. Students with pre-existing medical conditions were asked not to participate, and students with any self-reported medical conditions were automatically excluded.                                                                                                                                                       |
| <b>Interventions</b> | A 3 day simulation with each day including a designed activity with loss of the dominant hand usage, vision and speech. Simulations were followed by small group discussions regarding the daily activity, which covered its purpose, their feelings about the activity, items they learned, key take-away points, and how the items would affect their practice as future health care providers. This was followed by a large group discussion |
| <b>Outcomes</b>      | The purpose of this study was to determine the immediate and sustained impact of a single, 3-day empathy intervention on empathy levels among students. The JSE-HPS was used to measure self-reported empathy at baseline, 7 days post-intervention and 90 days post-intervention.                                                                                                                                                              |
| <b>Notes</b>         | -                                                                                                                                                                                                                                                                                                                                                                                                                                               |

**Risk of bias table**

| Bias                                                      | Authors' judgement | Support for judgement                                                                                                                                                                                                                                           |
|-----------------------------------------------------------|--------------------|-----------------------------------------------------------------------------------------------------------------------------------------------------------------------------------------------------------------------------------------------------------------|
| Random sequence generation (selection bias)               | Unclear risk       | "Forty student pharmacists who volunteered and provided informed consent were then randomly assigned to either the intervention or control group"<br><br>No information provided on random sequence generation                                                  |
| Allocation concealment (selection bias)                   | Unclear risk       | "Subjects were randomized to an intervention group (n520) or control group (n520) and completed the JSE-HPS at baseline, 7 days postintervention, and 90 days postintervention."<br><br>No information provided on allocation of students                       |
| Blinding of participants and personnel (performance bias) | High risk          | "The purpose of this study was to determine the immediate and sustained impact of a single, 3-day empathy intervention on empathy levels among students and to address the lack of a control group by using a randomized, non-blinded, quasi-controlled design" |



Winter R, Isa E, Roberts N, Norman RI, Howick J 2019

|                                                 |           |                                                                                                                                                                                                                                                                 |
|-------------------------------------------------|-----------|-----------------------------------------------------------------------------------------------------------------------------------------------------------------------------------------------------------------------------------------------------------------|
| Blinding of outcome assessment (detection bias) | High risk | "The Jefferson Scale of Empathy-Health Profession Students version (JSE-HPS) was administered to the intervention and control groups at baseline, 7 days following the intervention (as post-test 1), and 90 days following the intervention (as post-test 2)." |
| Incomplete outcome data (attrition bias)        | Low risk  | No attrition from randomisation to reporting                                                                                                                                                                                                                    |
| Selective reporting (reporting bias)            | Low risk  | Outcomes reported as per methodology                                                                                                                                                                                                                            |
| Other bias                                      | Low risk  | No other bias detected                                                                                                                                                                                                                                          |

**LoSasso 2017**

|                      |                                                                                                                                                                                                                                                                                                                           |
|----------------------|---------------------------------------------------------------------------------------------------------------------------------------------------------------------------------------------------------------------------------------------------------------------------------------------------------------------------|
| <b>Methods</b>       | Randomised controlled trial                                                                                                                                                                                                                                                                                               |
| <b>Participants</b>  | The country of origin was USA.<br>70 medical students were randomised to either the intervention or control groups. Third-year students were eligible to participate in the study while on their regularly scheduled six-week paediatric clerkship if their outpatient assignment was at a site using the Epic EMR system |
| <b>Interventions</b> | Training session on EMR (electronic medical records) specific communication skills, including discussion of EMR use, the SALTED (set-up, ask, listen, type, exceptions, documentation) mnemonic and technique and role-play.                                                                                              |
| <b>Outcomes</b>      | Empathy was measured pre and post intervention using the self-rated JSE questionnaire. In addition an observer rating of empathy was taken using the JSPPE (Jefferson Scale of Patient Perception of Physician Empathy).                                                                                                  |
| <b>Notes</b>         | No funding source reported.                                                                                                                                                                                                                                                                                               |

**Risk of bias table**

| Bias                                                      | Authors' judgement | Support for judgement                                                                                                                                                                                                                    |
|-----------------------------------------------------------|--------------------|------------------------------------------------------------------------------------------------------------------------------------------------------------------------------------------------------------------------------------------|
| Random sequence generation (selection bias)               | Unclear risk       | "Participants in each six-week clerkship block were randomly assigned to the intervention group (n = 38) or to the control group (n = 32)."<br><br>Not stated how randomisation occurred                                                 |
| Allocation concealment (selection bias)                   | Unclear risk       | Details on allocation process not given                                                                                                                                                                                                  |
| Blinding of participants and personnel (performance bias) | High risk          | "In consenting for the study, students in both groups were made aware that the study examined how the training may improve empathy, which could have led to some bias."                                                                  |
| Blinding of outcome assessment (detection bias)           | Unclear risk       | The SP and faculty raters' were blinded to whether students were in the intervention or control group – and completed the observer-rated scale JSPPE (low risk)<br><br>Self-reported scale JSE outcome assessors not blinded (high risk) |
| Incomplete outcome data (attrition bias)                  | Low risk           | No attrition from randomisation to analysis                                                                                                                                                                                              |
| Selective reporting (reporting bias)                      | Low risk           | Outcomes reported as per methodology                                                                                                                                                                                                     |
| Other bias                                                | Low risk           | No other bias detected                                                                                                                                                                                                                   |

**Mueller 2018**

|                     |                                                                                                                                                                                                                                                                         |
|---------------------|-------------------------------------------------------------------------------------------------------------------------------------------------------------------------------------------------------------------------------------------------------------------------|
| <b>Methods</b>      | Randomised controlled trial.                                                                                                                                                                                                                                            |
| <b>Participants</b> | The country of origin was USA.<br>19 physical therapy students were randomised to the intervention group and 18 to the control group (which was a 'delayed' intervention group).<br>All students entering the third year were approached. No exclusion criteria listed. |

Winter R, Isa E, Roberts N, Norman RI, Howick J 2019

|                      |                                                                                                                                                                                                                                                                                                                                                                 |
|----------------------|-----------------------------------------------------------------------------------------------------------------------------------------------------------------------------------------------------------------------------------------------------------------------------------------------------------------------------------------------------------------|
| <b>Interventions</b> | On-line Called to Care curriculum used to improve patient outcomes through the development of optimal physical therapist behaviours. (employs film clips, quidded questions, research articles and other readings to promote the clinical application of educational concepts. Participants post and respond via a discussion board for each of the 11 modules. |
| <b>Outcomes</b>      | The JSE-HP was used to measure a change in empathy pre and post intervention.                                                                                                                                                                                                                                                                                   |
| <b>Notes</b>         |                                                                                                                                                                                                                                                                                                                                                                 |

**Risk of bias table**

| Bias                                                      | Authors' judgement | Support for judgement                                                                                                                                                                                                                                               |
|-----------------------------------------------------------|--------------------|---------------------------------------------------------------------------------------------------------------------------------------------------------------------------------------------------------------------------------------------------------------------|
| Random sequence generation (selection bias)               | Low risk           | "Participants were randomly assigned (via a blinded shuffle of cards) to an immediate intervention group or a delayed intervention group."                                                                                                                          |
| Allocation concealment (selection bias)                   | Low risk           | "Participants were randomly assigned (via a blinded shuffle of cards) to an immediate intervention group or a delayed intervention group. The deck included only the numbered cards (to ensure an event 50/50 split) and group assignment based on events or odds." |
| Blinding of participants and personnel (performance bias) | High risk          | An orientation to the Called to Care curriculum was provided to all participants at the end of the spring 2015 semester. The participants were informed of their designation into the immediate or delayed intervention group.                                      |
| Blinding of outcome assessment (detection bias)           | High risk          | Self-reported scale                                                                                                                                                                                                                                                 |
| Incomplete outcome data (attrition bias)                  | Low risk           | Of the 37 participants 1 withdraw due to pregnancy-related delay in her internship (2.7%)                                                                                                                                                                           |
| Selective reporting (reporting bias)                      | Low risk           | Outcomes reported as per methodology                                                                                                                                                                                                                                |
| Other bias                                                | High risk          | No other bias detected                                                                                                                                                                                                                                              |

**Reiss 2012**

|                      |                                                                                                                                                                                                                                                                                                                                                                                                                                                                                                                                                                                                 |
|----------------------|-------------------------------------------------------------------------------------------------------------------------------------------------------------------------------------------------------------------------------------------------------------------------------------------------------------------------------------------------------------------------------------------------------------------------------------------------------------------------------------------------------------------------------------------------------------------------------------------------|
| <b>Methods</b>       | Randomised controlled trial                                                                                                                                                                                                                                                                                                                                                                                                                                                                                                                                                                     |
| <b>Participants</b>  | The country of origin was USA.<br>54 residents and fellows were randomised to the intervention group and 45 to the control group.<br>Residents and fellows were eligible if they (1) were currently in training, (2) were available to attend all three training modules, and (3) had clinical interactions with adult outpatients or inpatients able to complete physician rating surveys.<br>Trainees on clinical rotations outside MEEI or MGH were excluded.<br>Trainees on night float, paediatrics, ICU or research rotations were excluded unless they had a clinic with adult patients. |
| <b>Interventions</b> | Empathy and relational skills training protocol developed by first author and previously tested in a pilot study. Aims of training (1) scientific foundation of empathy, (2) increase awareness of physiology of emotions, (3) improve skills in decoding facial expressions of emotion, (4) teach empathic responses.<br>Training was delivered by a trained physician in both the inpatient and outpatient setting. The duration of intervention was 4 hours and was delivered in 60 minute modules spaced over 4 weeks.                                                                      |
| <b>Outcomes</b>      | Change in empathy was assessed by patients using the CARE measure as the primary outcome. As secondary outcomes the following was measured: Physician skill at decoding facial expression (The Ekman Facial Decoding Test). Self-rated physician attitude about empathy (JSPSE, validated scale). Self-rated general empathic responsiveness in personal life (The Balanced Emotional Empathy Scale, BEES)                                                                                                                                                                                      |
| <b>Notes</b>         | -                                                                                                                                                                                                                                                                                                                                                                                                                                                                                                                                                                                               |

Winter R, Isa E, Roberts N, Norman RI, Howick J 2019

**Risk of bias table**

| Bias                                                      | Authors' judgement | Support for judgement                                                                                                                                                                                                                                                                                                                                             |
|-----------------------------------------------------------|--------------------|-------------------------------------------------------------------------------------------------------------------------------------------------------------------------------------------------------------------------------------------------------------------------------------------------------------------------------------------------------------------|
| Random sequence generation (selection bias)               | Low risk           | "Group assignment was determined by a computer-generated random number sequence"                                                                                                                                                                                                                                                                                  |
| Allocation concealment (selection bias)                   | Low risk           | "Participating physicians were randomly assigned in a 1:1 allocation ratio to either the training intervention or to standard residency or fellowship training"                                                                                                                                                                                                   |
| Blinding of participants and personnel (performance bias) | High risk          | "Participating physicians were randomly assigned in a 1:1 allocation ratio to either the training intervention or to standard residency or fellowship training."<br><br>"The training was comprised of three 60-minute modules spaced over 4 weeks"                                                                                                               |
| Blinding of outcome assessment (detection bias)           | Unclear risk       | "Patients were blind to physician randomization, and physicians were blinded to which patients completed the surveys"<br><br>"The primary outcome measure was change in empathetic and relational skills as assessed by patients blinded to physician randomization"<br><br>Secondary outcomes – self rated scales of empathy so unable to blind outcome assessor |
| Incomplete outcome data (attrition bias)                  | Low risk           | Overall attrition rate 7.5% (4 participants lost in control group, 1 participant lost in intervention group).                                                                                                                                                                                                                                                     |
| Selective reporting (reporting bias)                      | Low risk           | Primary and secondary outcomes reported as stated in methods.                                                                                                                                                                                                                                                                                                     |
| Other bias                                                | Low risk           | No other bias detected                                                                                                                                                                                                                                                                                                                                            |

**Shapiro 1998**

|                      |                                                                                                                                                                                                                                                                                                                                                                                                                                                                                                                                                                                                        |
|----------------------|--------------------------------------------------------------------------------------------------------------------------------------------------------------------------------------------------------------------------------------------------------------------------------------------------------------------------------------------------------------------------------------------------------------------------------------------------------------------------------------------------------------------------------------------------------------------------------------------------------|
| <b>Methods</b>       | Matched randomised experiment with wait-list controls.                                                                                                                                                                                                                                                                                                                                                                                                                                                                                                                                                 |
| <b>Participants</b>  | 78 premedical and medical students were randomised to either the intervention or control groups.<br>Inclusion criteria: first- and second-year medical students, the premedical honours society, and the Fostering and Achieving Cultural Equity and Sensitivity (FACES) premedical student group.<br>Only those students willing to be randomly assigned to either the intervention or control group were included in the study.                                                                                                                                                                      |
| <b>Interventions</b> | Elective module in Stress Reduction and Relaxation. The core of the program focused on training the students in mindfulness. Participants received training in: "Sitting Meditation", "Body Scan" and "Hatha Yoga". Emphasis on mindful breathing, "lovingkindness" and "forgiveness". In addition, students participated in experiential exercises designed to cultivate mindful listening skills and empathy.<br>The training was delivered via a mixture of didactic teaching and small group sessions. The duration was approximately 18 hours delivered in 2.5 hour weekly sessions over 8 weeks. |
| <b>Outcomes</b>      | Empathy was measured using an adapted version (half of the original version of 84 items) of The Empathy Construct Rating Scale (ECRS).                                                                                                                                                                                                                                                                                                                                                                                                                                                                 |
| <b>Notes</b>         | No funding source reported                                                                                                                                                                                                                                                                                                                                                                                                                                                                                                                                                                             |

**Risk of bias table**

| Bias | Authors' judgement | Support for judgement |
|------|--------------------|-----------------------|
|------|--------------------|-----------------------|

Winter R, Isa E, Roberts N, Norman RI, Howick J 2019

|                                                           |              |                                                                                                                                                                                                                                                                                                                                 |
|-----------------------------------------------------------|--------------|---------------------------------------------------------------------------------------------------------------------------------------------------------------------------------------------------------------------------------------------------------------------------------------------------------------------------------|
| Random sequence generation (selection bias)               | Unclear risk | “The design was a matched randomized experiment in which participants were assigned to a 7-week mindfulness-based intervention or a wait-list control group.”<br>Random sequence generation not reported                                                                                                                        |
| Allocation concealment (selection bias)                   | Unclear risk | Details of allocation concealment not stated                                                                                                                                                                                                                                                                                    |
| Blinding of participants and personnel (performance bias) | High risk    | “The design was a matched randomized experiment in which participants were assigned to a 7-week mindfulness-based intervention or a wait-list control group”                                                                                                                                                                    |
| Blinding of outcome assessment (detection bias)           | Unclear risk | “all assessment measures were self-report psychological questionnaires which are intrinsically limited and open to response bias.”                                                                                                                                                                                              |
| Incomplete outcome data (attrition bias)                  | Low risk     | “One student did not complete the intervention due to severe medical problems for which she was hospitalized. Four of the participants in the control group did not complete the post-measures. The final count of participants was 73, consisting of 32 males and 41 females, 35 premedical students and 38 medical students.” |
| Selective reporting (reporting bias)                      | High risk    | “Outcomes reported as a cohort in general.”                                                                                                                                                                                                                                                                                     |
| Other bias                                                | Low risk     | No other bias detected                                                                                                                                                                                                                                                                                                          |

**Sripada 2010**

|                      |                                                                                                                                                                                                                                                                                                                                                                                                                                                                                                                                                                                                                                                                                                                                                                                                                                                                                                                                                         |
|----------------------|---------------------------------------------------------------------------------------------------------------------------------------------------------------------------------------------------------------------------------------------------------------------------------------------------------------------------------------------------------------------------------------------------------------------------------------------------------------------------------------------------------------------------------------------------------------------------------------------------------------------------------------------------------------------------------------------------------------------------------------------------------------------------------------------------------------------------------------------------------------------------------------------------------------------------------------------------------|
| <b>Methods</b>       | Pilot randomised controlled trial                                                                                                                                                                                                                                                                                                                                                                                                                                                                                                                                                                                                                                                                                                                                                                                                                                                                                                                       |
| <b>Participants</b>  | The country of origin was USA.<br>12 psychiatry residents were randomised to either the intervention or control group. All second- through fourth-year psychiatry residents treating out-patients at the University of Illinois College of Medicine during the academic years 2002–2005 were eligible to participate in this study.<br>Patients were eligible if they were between the ages of 18 and 65, were in treatment for an Axis I psychiatric disorder, had no intellectual disability, and were not suicidal or psychotic.                                                                                                                                                                                                                                                                                                                                                                                                                     |
| <b>Interventions</b> | A feedback intervention designed to increase therapist empathic understanding and improve patient outcomes in psychotherapy was delivered.<br>The feedback intervention condition involved completing the empathy measure along with other measures, and engaging in the feedback intervention which involved: At the end of each therapy session, patients and therapists recorded their views of the patient’s GAF and predicted the GAF ratings of the other. In the intervention condition, at the beginning of the next session, therapists and patients exchanged ratings from the preceding session, providing an opportunity to discuss their respective views.<br>The average number of sessions completed by each therapist–patient pair was 14.1<br>The average duration of patient participation in the study was 13.75 (±7.0) sessions or 183.87 (± 111.1) days. The average duration of therapist participation was 195.8 (± 117.4) days. |
| <b>Outcomes</b>      | The Barrett-Lennard Relationship Inventory - 6-item scale designed to assess patients’ ratings of therapist empathy as well as therapists’ self-ratings of empathy.                                                                                                                                                                                                                                                                                                                                                                                                                                                                                                                                                                                                                                                                                                                                                                                     |
| <b>Notes</b>         | -                                                                                                                                                                                                                                                                                                                                                                                                                                                                                                                                                                                                                                                                                                                                                                                                                                                                                                                                                       |

**Risk of bias table**

| Bias                                                      | Authors' judgement | Support for judgement                                                                                                                                                                                       |
|-----------------------------------------------------------|--------------------|-------------------------------------------------------------------------------------------------------------------------------------------------------------------------------------------------------------|
| Random sequence generation (selection bias)               | Unclear risk       | “Patient-therapist pairs were randomly assigned by the first author to the intervention or control group by flipping a coin.” However how therapists were assigned to intervention or control not reported. |
| Allocation concealment (selection bias)                   | Unclear risk       | Allocation to intervention/control not described                                                                                                                                                            |
| Blinding of participants and personnel (performance bias) | High risk          | "Patients were blind to intervention condition, but therapists were not, as they administered the intervention".                                                                                            |

Winter R, Isa E, Roberts N, Norman RI, Howick J 2019

|                                                 |              |                                                                                                                                                                                                                                                            |
|-------------------------------------------------|--------------|------------------------------------------------------------------------------------------------------------------------------------------------------------------------------------------------------------------------------------------------------------|
| Blinding of outcome assessment (detection bias) | Unclear risk | "A more methodological limitation of this study is the potential for contamination that existed because a single therapist treated five patients, three of whom were assigned to control, and two of whom were assigned to intervention."                  |
| Incomplete outcome data (attrition bias)        | Low risk     | Methodology states: "Additionally, at the end of the 1st, 5th, 10th, 15th, and 20th sessions, patient and therapist subjects in both groups completed their respective forms of the BLRI (Barrett-Lennard, 1976). Only patient scores reported in results" |
| Selective reporting (reporting bias)            | High risk    | Data not explicitly reported for each group                                                                                                                                                                                                                |
| Other bias                                      | Unclear risk | difference in baseline demographics of therapists and patients not reported                                                                                                                                                                                |

**Sterkenburg 2018**

|                      |                                                                                                                                                                                                                                                                                                                                                                                   |
|----------------------|-----------------------------------------------------------------------------------------------------------------------------------------------------------------------------------------------------------------------------------------------------------------------------------------------------------------------------------------------------------------------------------|
| <b>Methods</b>       | Parallel randomised controlled trial                                                                                                                                                                                                                                                                                                                                              |
| <b>Participants</b>  | The country of origin was the Netherlands.<br>111 care workers were randomised to the intervention group and 113 to the control group.<br>Inclusion: Care workers working with people with disabilities                                                                                                                                                                           |
| <b>Interventions</b> | Playing a computer-based serious game "The World of EMPA", aimed at enhancing empathy towards people with disabilities. The game illustrates characters with several types of disability, with six levels in which players have to respond to multiple-choice questions.<br>The intervention was delivered online and took 20 minutes to complete. It was a one-off intervention. |
| <b>Outcomes</b>      | The Empathy Quotient (EQ) short version self-rating questionnaire was administered to assess changes in empathy at baseline and immediately following the intervention.                                                                                                                                                                                                           |
| <b>Notes</b>         | Funding source not stated.                                                                                                                                                                                                                                                                                                                                                        |

**Risk of bias table**

| Bias                                                      | Authors' judgement | Support for judgement                                                                                                                                                                                                     |
|-----------------------------------------------------------|--------------------|---------------------------------------------------------------------------------------------------------------------------------------------------------------------------------------------------------------------------|
| Random sequence generation (selection bias)               | Low risk           | "Upon completion of the pre-test phase, participants were automatically randomized via a computerized random assignment to one of the two conditions, based on the Mersenne Twister pseudorandom number generator (PRNG)" |
| Allocation concealment (selection bias)                   | Low risk           | "The automatic computer-based randomization was implemented in the programming script of the experiment, resulting in the concealed allocation of the participants into one of the two intervention arms"                 |
| Blinding of participants and personnel (performance bias) | Low risk           | "The participants were also unaware whether the condition they were allocated to was the experimental or control condition"                                                                                               |
| Blinding of outcome assessment (detection bias)           | Low risk           | "The researcher was blind to condition once participants started the computer program".                                                                                                                                   |
| Incomplete outcome data (attrition bias)                  | Low risk           | a total of 224 care workers working with people with disabilities were recruited, and 223 completed the study                                                                                                             |
| Selective reporting (reporting bias)                      | Low risk           | Outcomes reported as per methodology                                                                                                                                                                                      |
| Other bias                                                | Low risk           | No other bias detected                                                                                                                                                                                                    |

**Tulsky 2011**

|                     |                                                                                                                                                                                                                    |
|---------------------|--------------------------------------------------------------------------------------------------------------------------------------------------------------------------------------------------------------------|
| <b>Methods</b>      | Parallel randomised controlled trial                                                                                                                                                                               |
| <b>Participants</b> | The country of origin was USA.<br>24 medical, gynaecological and radiation oncologists were randomised to the intervention group and 24 to the control group.<br>Inclusion and exclusion criteria were not stated. |

Winter R, Isa E, Roberts N, Norman RI, Howick J 2019

|                      |                                                                                                                                                                                                                                                                                                                                                       |
|----------------------|-------------------------------------------------------------------------------------------------------------------------------------------------------------------------------------------------------------------------------------------------------------------------------------------------------------------------------------------------------|
| <b>Interventions</b> | A communication lecture (1 hour) was delivered to all intervention and control students. An interactive CD-ROM about responding to patients' negative emotions was then given to intervention participants. The CD-ROM included tailored feedback on the oncologists own recorded conversations. Participants had up to one month to view the CD-ROM. |
| <b>Outcomes</b>      | Empathic statements - Post-intervention audio recordings were used to identify the number of empathic statements and responses to patients' expressions of negative emotion.<br>Perceived empathy - 10 Likert scale items was used to assess perceived oncologist empathy (as assessed by patient)                                                    |
| <b>Notes</b>         | -                                                                                                                                                                                                                                                                                                                                                     |

#### Risk of bias table

| Bias                                                      | Authors' judgement | Support for judgement                                                                                                                                                                                                                                                                                                      |
|-----------------------------------------------------------|--------------------|----------------------------------------------------------------------------------------------------------------------------------------------------------------------------------------------------------------------------------------------------------------------------------------------------------------------------|
| Random sequence generation (selection bias)               | Low risk           | "The oncologists were then randomly assigned by using the minimization method"                                                                                                                                                                                                                                             |
| Allocation concealment (selection bias)                   | Low risk           | "The oncologists were stratified by balanced randomization in a 1:1 ratio by site (Durham or Pittsburgh), sex (men or women), and specialty (medical oncology, solid and liquid tumours; medical oncology, solid tumours only; malignant haematology, liquid tumours only; gynaecologic oncology; or radiation oncology)." |
| Blinding of participants and personnel (performance bias) | High risk          | "All of the oncologists viewed a 1-hour lecture on communication skills delivered by one of the investigators. In addition, oncologists in the intervention group received a CD-ROM training program on communication skills that was tailored with exemplars from their own audio-recorded clinic visits."                |
| Blinding of outcome assessment (detection bias)           | Low risk           | "Two independent, blinded coders were trained over 6 weeks"                                                                                                                                                                                                                                                                |
| Incomplete outcome data (attrition bias)                  | Low risk           | No attrition from randomisation to analysis                                                                                                                                                                                                                                                                                |
| Selective reporting (reporting bias)                      | Low risk           | Outcomes reported as per methodology                                                                                                                                                                                                                                                                                       |
| Other bias                                                | Low risk           | No other bias detected                                                                                                                                                                                                                                                                                                     |

#### Vaghee 2018

|                      |                                                                                                                                                                                                                                                                                                                                                                                                                                                                                                                                                                                                                                                                                                    |
|----------------------|----------------------------------------------------------------------------------------------------------------------------------------------------------------------------------------------------------------------------------------------------------------------------------------------------------------------------------------------------------------------------------------------------------------------------------------------------------------------------------------------------------------------------------------------------------------------------------------------------------------------------------------------------------------------------------------------------|
| <b>Methods</b>       | Cluster randomised controlled trial                                                                                                                                                                                                                                                                                                                                                                                                                                                                                                                                                                                                                                                                |
| <b>Participants</b>  | The country of origin was Iran. Nursing faculties training mental health clerkship in Ibne-Sina psychiatric hospital were invited to attend in the study, and accordingly, 12 faculties accepted the invitation, and 4 faculties were randomly selected. 127 nursing students were randomised to one of three groups: two intervention groups or a control group. Inclusion criteria were no work experience in psychiatric wards, no psychological disorders, and no mental illness in their first and second degree relatives. Exclusion criteria were reluctance to continue the study, absence of the post-test, and being absent or lack of participation in 1 or more intervention sessions. |
| <b>Interventions</b> | The two intervention groups were:<br>Contact based education: In contact-based education, 3 patients with improved disorders who were working daily for 4 hours as a connector between different wards of the hospital were selected. They had schizophrenia, bipolar type I, and major depression. The patients were asked to talk about their experiences and personal life with students<br>Acceptance and commitment education: According to Steven Hayse protocol (1986), ACT with the content of mental illnesses stigma was held as a workshop by one master of clinical psychology and 2 masters of psychiatric nursing,                                                                   |
| <b>Outcomes</b>      | The study aimed at comparing the effects of contact-based education and commitment and acceptance-based training on empathy toward mental illnesses among nursing students. The JSE was used as a self-rating measure of empathy pre and post intervention.                                                                                                                                                                                                                                                                                                                                                                                                                                        |

Winter R, Isa E, Roberts N, Norman RI, Howick J 2019

|              |   |
|--------------|---|
| <b>Notes</b> | - |
|--------------|---|

**Risk of bias table**

| Bias                                                      | Authors' judgement | Support for judgement                                                                                                                                                                                                                                                                                                           |
|-----------------------------------------------------------|--------------------|---------------------------------------------------------------------------------------------------------------------------------------------------------------------------------------------------------------------------------------------------------------------------------------------------------------------------------|
| Random sequence generation (selection bias)               | Unclear risk       | "Two groups of male and female students were randomly selected (according to clerkship division group) from each university by quota sampling based on gender distribution. Finally, each group was separately divided into 3 groups of contact-based education, ACT, and control."<br>No details on random sequence generation |
| Allocation concealment (selection bias)                   | Unclear risk       | No details on allocation concealment reported                                                                                                                                                                                                                                                                                   |
| Blinding of participants and personnel (performance bias) | High risk          | "The patients were asked to talk about their experiences and personal life with students"                                                                                                                                                                                                                                       |
| Blinding of outcome assessment (detection bias)           | High risk          | Self-reported outcome measures                                                                                                                                                                                                                                                                                                  |
| Incomplete outcome data (attrition bias)                  | Low risk           | Low attrition rate (12.5%)                                                                                                                                                                                                                                                                                                      |
| Selective reporting (reporting bias)                      | High risk          | Outcomes are not clearly stated in methodology                                                                                                                                                                                                                                                                                  |
| Other bias                                                | Unclear risk       | Recruitment bias: Random cluster and quota sampling methods were used. Nursing faculties training mental health clerkship in Ibne-Sina psychiatric hospital were invited to attend in the study, and accordingly, 12 faculties accepted the invitation, and 4 faculties were randomly selected.                                 |

**Wolf 1987**

|                      |                                                                                                                                                                                                                                                                                                                                                                                                                                                                                                                                                          |
|----------------------|----------------------------------------------------------------------------------------------------------------------------------------------------------------------------------------------------------------------------------------------------------------------------------------------------------------------------------------------------------------------------------------------------------------------------------------------------------------------------------------------------------------------------------------------------------|
| <b>Methods</b>       | Randomised controlled trial                                                                                                                                                                                                                                                                                                                                                                                                                                                                                                                              |
| <b>Participants</b>  | The county of origin was Canada<br>65 medical students were randomised to the intervention group and 69 to the control group.<br>Part of course was conducted in community nursing homes, so not all students could be scheduled to participate in it at the same time. Therefore, some of the students participated in the main part of the study. The remaining (excluded) students participated in the course after the study was completed.                                                                                                          |
| <b>Interventions</b> | Programme in medical interviewing and history taking that integrates humanistic principles and medical content. The course is designed to use community resources and maximise efficient use of faculty members' time. Consists of set of large group lectures and then small group teaching sessions which included discussing strategies for responding empathically to patients.<br>The teaching was delivered in small group sessions by social workers and educational psychologists. It consisted of 3 x 4 hour sessions and was delivered weekly. |
| <b>Outcomes</b>      | The Medical Communication Index (MCI) served as the dependent variable to measure the students' responses to patients' emotional concerns<br>The Helping relationship Inventory (HRI) served to measure the dependent variable to measure the students' preferences for responses that expressed empathy or understanding.                                                                                                                                                                                                                               |
| <b>Notes</b>         | No funding source stated                                                                                                                                                                                                                                                                                                                                                                                                                                                                                                                                 |

**Risk of bias table**

| Bias                                        | Authors' judgement | Support for judgement                                                                                                                                                                                                                                     |
|---------------------------------------------|--------------------|-----------------------------------------------------------------------------------------------------------------------------------------------------------------------------------------------------------------------------------------------------------|
| Random sequence generation (selection bias) | Unclear risk       | "All students in both the intervention and control groups attended these large group lectures. Following this instruction, the students were randomly assigned to an intervention or control group"<br>Details of random sequence generation not reported |

Winter R, Isa E, Roberts N, Norman RI, Howick J 2019

|                                                           |              |                                                                                                                                                                                                                                                                                                                                                        |
|-----------------------------------------------------------|--------------|--------------------------------------------------------------------------------------------------------------------------------------------------------------------------------------------------------------------------------------------------------------------------------------------------------------------------------------------------------|
| Allocation concealment (selection bias)                   | Unclear risk | “Part of course conducted in community nursing homes, not all students could be scheduled to participate in it at the same time. Therefore, only 134 of these students participated in the main part of the study. The remaining (excluded) students participated in the course after the study was completed.”<br>Allocation concealment not reported |
| Blinding of participants and personnel (performance bias) | High risk    | “The 69 students in the control group received no other instruction in communication skills during the study. The 65 students in the intervention group were divided into four smaller groups. Each group met for four weekly, three-hour sessions.”                                                                                                   |
| Blinding of outcome assessment (detection bias)           | High risk    | Self-rated outcome assessment                                                                                                                                                                                                                                                                                                                          |
| Incomplete outcome data (attrition bias)                  | Unclear risk | 24 lost to follow up (not clearly stated) on analysis of MCI). Not explicitly stated on what number of students’ basis analysis carried out, how many lost to follow up or reasons                                                                                                                                                                     |
| Selective reporting (reporting bias)                      | High risk    | Outcomes not clearly stated in methodology.                                                                                                                                                                                                                                                                                                            |
| Other bias                                                | Unclear risk | no baseline demographics reported so cannot comment on baseline differences                                                                                                                                                                                                                                                                            |

**Wundrich 2017**

|                      |                                                                                                                                                                                                                                                          |
|----------------------|----------------------------------------------------------------------------------------------------------------------------------------------------------------------------------------------------------------------------------------------------------|
| <b>Methods</b>       | Randomised controlled trial.                                                                                                                                                                                                                             |
| <b>Participants</b>  | The country of origin was Germany.<br>158 third year medical students were randomised to either an intervention or control group.<br>No inclusion or exclusion criteria were stated.                                                                     |
| <b>Interventions</b> | A three week training course with focus on empathy: The empathy skills training consisted of an introduction course on empathy and empathy skills training with simulated patients. The duration of the intervention was 6 hours delivered over 3 weeks. |
| <b>Outcomes</b>      | The self-rated JSPE (student version) was used to measure empathy in addition to an empathy-related communications skills questionnaire completed by an observer.                                                                                        |
| <b>Notes</b>         | -                                                                                                                                                                                                                                                        |

**Risk of bias table**

| Bias                                                      | Authors' judgement | Support for judgement                                                                                                                                                                                                                 |
|-----------------------------------------------------------|--------------------|---------------------------------------------------------------------------------------------------------------------------------------------------------------------------------------------------------------------------------------|
| Random sequence generation (selection bias)               | Unclear risk       | “A total of 158 3rd year medical students at the University of Freiburg Medical Centre were assigned into an intervention group receiving an empathy training and a control group” Details of random sequence generation not reported |
| Allocation concealment (selection bias)                   | Unclear risk       | Allocation concealment not stated                                                                                                                                                                                                     |
| Blinding of participants and personnel (performance bias) | High risk          | “The intervention group participated in an empathy skills training with simulated patients (SPs). The control group participated in a history course.”                                                                                |
| Blinding of outcome assessment (detection bias)           | Unclear risk       | Experts and SPs were blinded to the students’ group membership - low risk for observer rated outcome.<br>Self-rated outcome high risk                                                                                                 |
| Incomplete outcome data (attrition bias)                  | Unclear risk       | Number analysed not reported. Missing data not reported                                                                                                                                                                               |
| Selective reporting (reporting bias)                      | High risk          | Number analysed not reported. Missing data not reported                                                                                                                                                                               |
| Other bias                                                | Unclear risk       | no baseline demographics reported so cannot comment on baseline differences                                                                                                                                                           |

**Yang 2018**

|                     |                                     |
|---------------------|-------------------------------------|
| <b>Methods</b>      | Cluster randomised controlled trial |
| <b>Participants</b> | The country of origin was China.    |



Winter R, Isa E, Roberts N, Norman RI, Howick J 2019

|                      |                                                                                                                                                                                                                                                                                                                                                                                                                                           |
|----------------------|-------------------------------------------------------------------------------------------------------------------------------------------------------------------------------------------------------------------------------------------------------------------------------------------------------------------------------------------------------------------------------------------------------------------------------------------|
|                      | 59 'grade 3' nursing students each were randomised to two intervention arms and 59 to a control arm of the study.<br>Exclusion criteria: students who were taking doctor–patient communication- related courses and students who were planning to take those courses during the study.                                                                                                                                                    |
| <b>Interventions</b> | The intervention was a narrative medicine programme. Two intervention groups: One group received the theoretical education part of the programme and one intervention group received both theoretical teaching and clinical experience.<br>The theoretical component was delivered by a teacher 'well trained in narrative medicine'. The clinical component was delivered by teaching nurses who had been trained in narrative medicine. |
| <b>Outcomes</b>      | The JSE (Chinese version) was administered to students at baseline and then at various follow up points post intervention: T1: January 2015 (pre-intervention), T2: July 2015 (post-step 1 intervention) T3: January 2016 (post-step 2 intervention), T4: July 2016 (0.5 years after the intervention), T5: January 2017 (1 year after the intervention), and T6: July 2017 (1.5 years after the intervention).                           |
| <b>Notes</b>         | -                                                                                                                                                                                                                                                                                                                                                                                                                                         |

**Risk of bias table**

| Bias                                                      | Authors' judgement | Support for judgement                                                                                                                                                                                                                                                                                                           |
|-----------------------------------------------------------|--------------------|---------------------------------------------------------------------------------------------------------------------------------------------------------------------------------------------------------------------------------------------------------------------------------------------------------------------------------|
| Random sequence generation (selection bias)               | Unclear risk       | Random sequence generation not stated.<br>"the six classes were randomly divided into three groups"                                                                                                                                                                                                                             |
| Allocation concealment (selection bias)                   | Unclear risk       | "Of the sixteen classes, six (30 students per class) were randomly selected to participate in this study."<br><br>"Taking each class as a unit, the six classes were randomly divided into three groups: one observation group (Group 1) and two experimental groups (Groups 2 and 3)."<br><br>Method of allocation not stated. |
| Blinding of participants and personnel (performance bias) | High risk          | No blinding of participants or personnel                                                                                                                                                                                                                                                                                        |
| Blinding of outcome assessment (detection bias)           | High risk          | Outcome assessors were not blinded.                                                                                                                                                                                                                                                                                             |
| Incomplete outcome data (attrition bias)                  | Low risk           | 5 participants from intervention groups and 7 controls lost to follow up. Attrition 6.6%                                                                                                                                                                                                                                        |
| Selective reporting (reporting bias)                      | Low risk           | Outcomes reported as stated in methods.                                                                                                                                                                                                                                                                                         |
| Other bias                                                | Unclear risk       | Recruitment bias:<br>Method of randomisation not described "six [classes] were randomly selected"<br>According to methodology, no participants were recruited after the clusters had been randomised.                                                                                                                           |

eTable 4 Empathy effect summary of findings

Winter R, Isa E, Roberts N, Norman RI, Howick J 2019

Summary of findings:

**Empathy training compared to Control for Healthcare students and professionals**

**Patient or population:** Healthcare students and professionals  
**Setting:** University, primary care settings, secondary care settings  
**Intervention:** Empathy training  
**Comparison:** Control

| Outcomes | Anticipated absolute effects* (95% CI) |                                           | Relative effect (95% CI) | No of participants (studies) | Certainty of the evidence (GRADE) | Comments                               |
|----------|----------------------------------------|-------------------------------------------|--------------------------|------------------------------|-----------------------------------|----------------------------------------|
|          | Risk with Control                      | Risk with Empathy training                |                          |                              |                                   |                                        |
| empathy  | -                                      | SMD 0.52 SD more (0.36 more to 0.37 more) | -                        | 2024 (22 RCTs)               | ⊕⊕○○ LOW <sup>a,b</sup>           | Empathy training may increase empathy. |

\*The risk in the intervention group (and its 95% confidence interval) is based on the assumed risk in the comparison group and the relative effect of the intervention (and its 95% CI).

CI: Confidence interval; SMD: Standardised mean difference

**GRADE Working Group grades of evidence**

**High certainty:** We are very confident that the true effect lies close to that of the estimate of the effect

**Moderate certainty:** We are moderately confident in the effect estimate: The true effect is likely to be close to the estimate of the effect, but there is a possibility that it is substantially different

**Low certainty:** Our confidence in the effect estimate is limited: The true effect may be substantially different from the estimate of the effect

**Very low certainty:** We have very little confidence in the effect estimate: The true effect is likely to be substantially different from the estimate of effect

**Footnotes**

*a High risk of bias suspected in 11 studies (with a high or unclear risk of bias for sequence generation and allocation concealment)*

*b There was variation across all studies with type of intervention and population studied*

eFigure 1. Risk of bias assessment

Winter R, Isa E, Roberts N, Norman RI, Howick J 2019

|                             | Random sequence generation (selection bias) | Allocation concealment (selection bias) | Blinding of participants and personnel (performance bias) | Blinding of outcome assessment (detection bias) | Incomplete outcome data (attrition bias) | Selective reporting (reporting bias) | Other bias |
|-----------------------------|---------------------------------------------|-----------------------------------------|-----------------------------------------------------------|-------------------------------------------------|------------------------------------------|--------------------------------------|------------|
| <b>Alhassan 2019</b>        | +                                           | +                                       | +                                                         | +                                               | +                                        | +                                    | +          |
| <b>Arthur 2017</b>          | +                                           | +                                       | +                                                         | +                                               | +                                        | +                                    | +          |
| <b>Blair Irvine 2012</b>    | ?                                           | ?                                       | +                                                         | ?                                               | +                                        | +                                    | ?          |
| <b>Buffel Du Vaure 2017</b> | +                                           | ?                                       | +                                                         | ?                                               | +                                        | +                                    | +          |
| <b>Butow 2007</b>           | +                                           | +                                       | +                                                         | ?                                               | ?                                        | +                                    | +          |
| <b>Collins 2017</b>         | ?                                           | ?                                       | +                                                         | ?                                               | +                                        | +                                    | +          |
| <b>Daniels 1998</b>         | ?                                           | ?                                       | +                                                         | +                                               | ?                                        | +                                    | ?          |
| <b>Foster 2016</b>          | +                                           | ?                                       | ?                                                         | +                                               | +                                        | ?                                    | +          |
| <b>Gholamzadeh 2018</b>     | +                                           | ?                                       | +                                                         | +                                               | +                                        | +                                    | +          |
| <b>Gould 2017</b>           | +                                           | +                                       | +                                                         | +                                               | +                                        | +                                    | ?          |
| <b>Hastings 2018</b>        | +                                           | +                                       | +                                                         | +                                               | +                                        | +                                    | +          |
| <b>Hattink 2015</b>         | +                                           | +                                       | +                                                         | +                                               | +                                        | +                                    | +          |
| <b>Larti 2018</b>           | +                                           | +                                       | +                                                         | +                                               | +                                        | +                                    |            |
| <b>Lobchuck 2018</b>        | +                                           | ?                                       | +                                                         | ?                                               | +                                        | ?                                    | ?          |
| <b>Lor 2014</b>             | ?                                           | ?                                       | +                                                         | +                                               | +                                        | +                                    | +          |
| <b>LoSasso 2017</b>         | ?                                           | ?                                       | +                                                         | ?                                               | +                                        | +                                    | +          |
| <b>Mueller 2018</b>         | +                                           | +                                       | +                                                         | +                                               | +                                        | +                                    | +          |
| <b>Reiss 2012</b>           | +                                           | +                                       | +                                                         | ?                                               | +                                        | +                                    | +          |
| <b>Shapiro 1998</b>         | ?                                           | ?                                       | +                                                         | ?                                               | +                                        | +                                    | +          |
| <b>Sripada 2010</b>         | ?                                           | ?                                       | +                                                         | ?                                               | +                                        | +                                    | ?          |
| <b>Sterkenburg 2018</b>     | +                                           | +                                       | +                                                         | +                                               | +                                        | +                                    | +          |
| <b>Tulsky 2011</b>          | +                                           | +                                       | +                                                         | +                                               | +                                        | +                                    | +          |
| <b>Vaghee 2018</b>          | ?                                           | ?                                       | +                                                         | +                                               | +                                        | +                                    | ?          |
| <b>Wolf 1987</b>            | ?                                           | ?                                       | +                                                         | +                                               | ?                                        | +                                    | ?          |
| <b>Wundrich 2017</b>        | ?                                           | ?                                       | +                                                         | ?                                               | ?                                        | +                                    | ?          |
| <b>Yang 2018</b>            | ?                                           | ?                                       | +                                                         | +                                               | +                                        | +                                    | ?          |

Winter R, Isa E, Roberts N, Norman RI, Howick J 2019

eFigure 2. Meta-analysis of sub-groups according to type of intervention

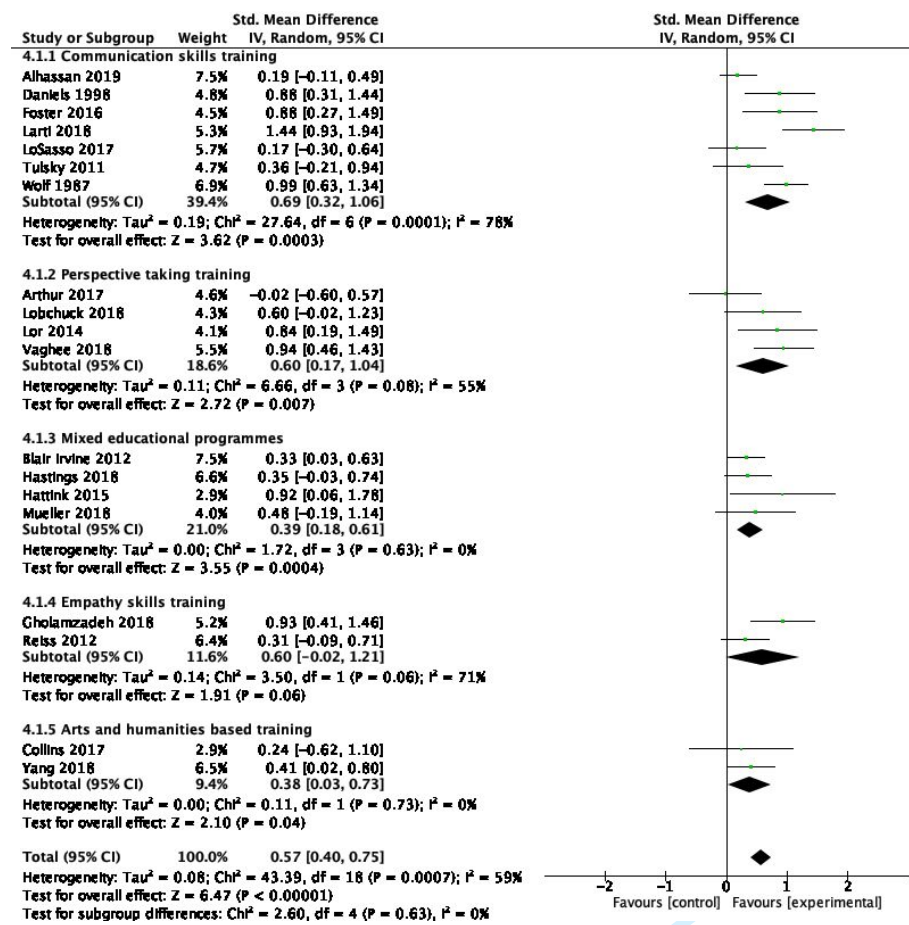

eFigure 3. Meta-analysis of subgroups according to duration of intervention

Winter R, Isa E, Roberts N, Norman RI, Howick J 2019

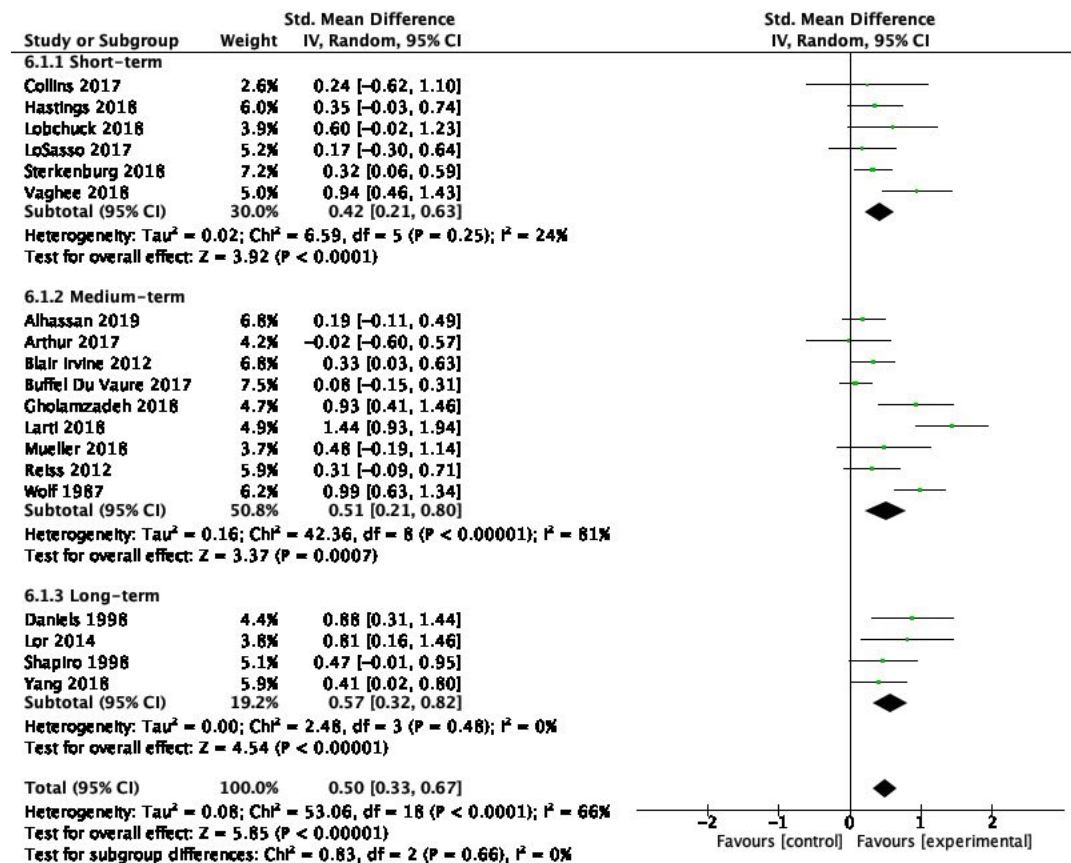

eFigure 4 Meta-analysis of subgroups according to participant population

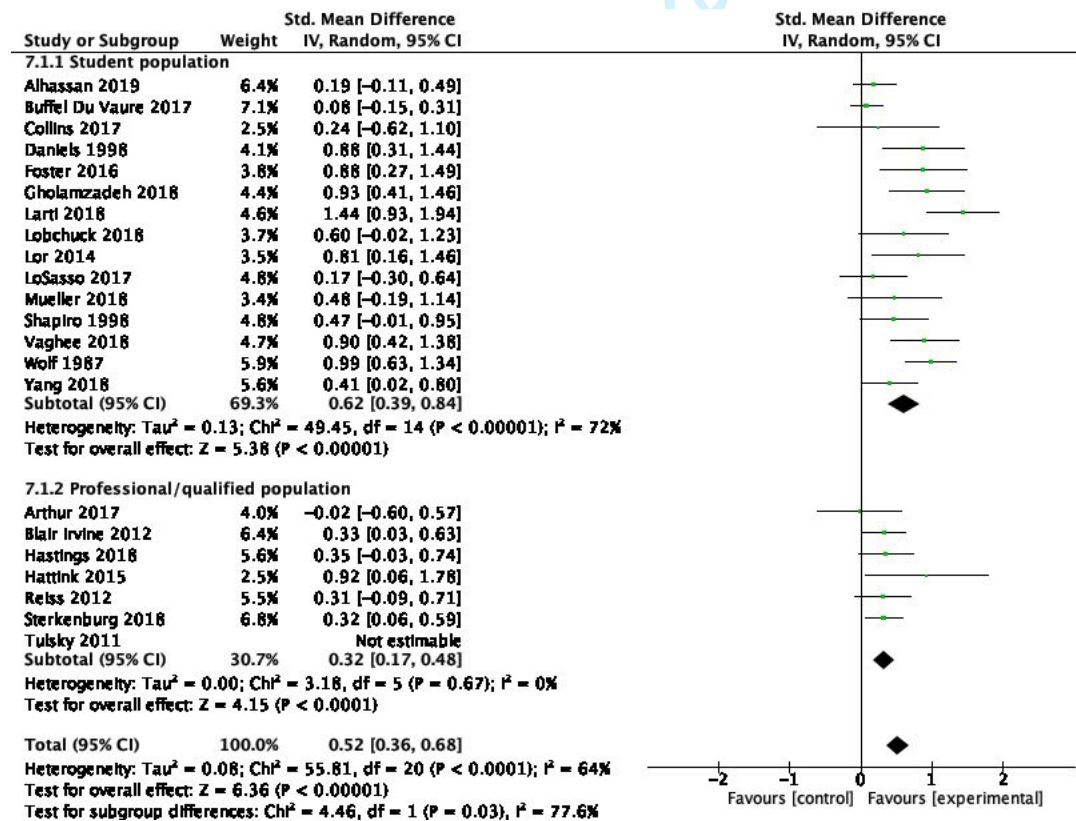

Winter R, Isa E, Roberts N, Norman RI, Howick J 2019

eFigure 5 Meta-analysis of subgroups according to outcome assessor

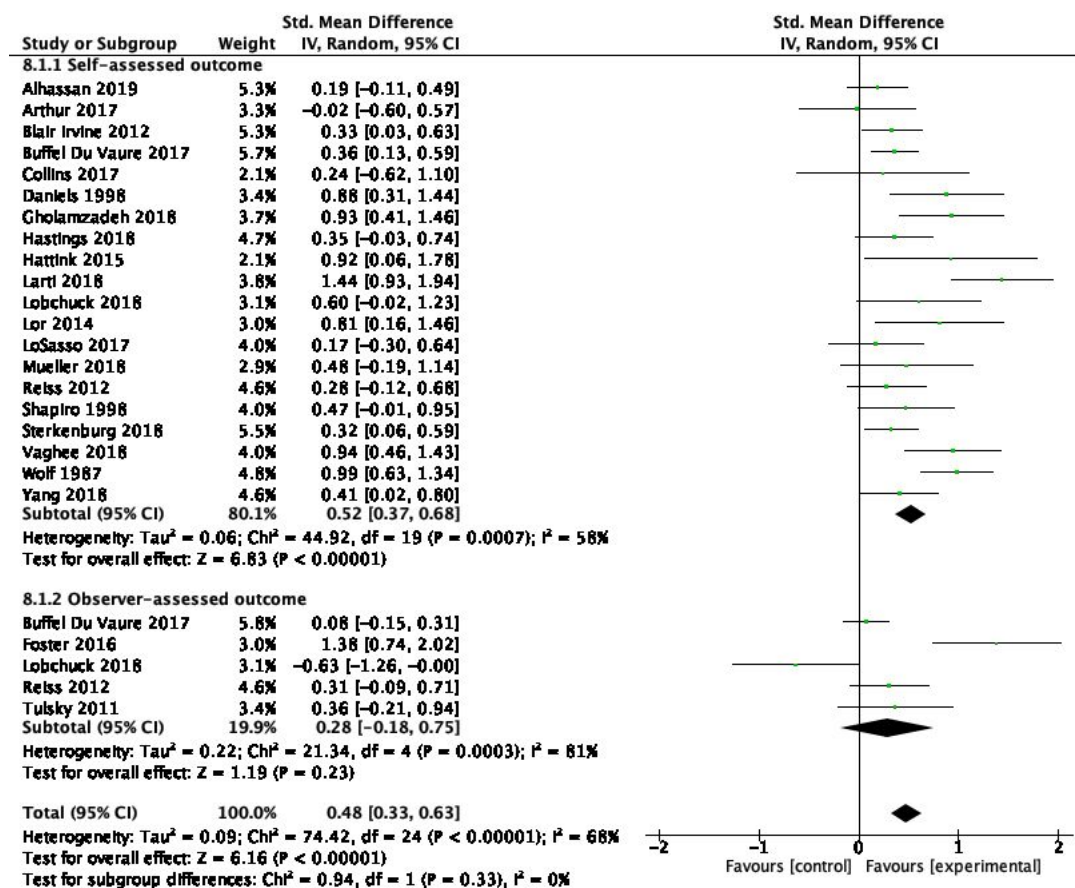

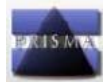

# PRISMA-DTA Checklist

1  
2  
3  
4  
5  
6  
7  
8  
9  
10  
11  
12  
13  
14  
15  
16  
17  
18  
19  
20  
21  
22  
23  
24  
25  
26  
27  
28  
29  
30  
31  
32  
33  
34  
35  
36  
37  
38  
39  
40  
41  
42  
43  
44  
45  
46  
47

| Section/topic                   | #  | PRISMA-DTA Checklist Item                                                                                                                                                                                                                                                                                                                                                                                                                | Reported on page # |
|---------------------------------|----|------------------------------------------------------------------------------------------------------------------------------------------------------------------------------------------------------------------------------------------------------------------------------------------------------------------------------------------------------------------------------------------------------------------------------------------|--------------------|
| <b>TITLE / ABSTRACT</b>         |    |                                                                                                                                                                                                                                                                                                                                                                                                                                          |                    |
| Title                           | 1  | Identify the report as a systematic review (+/- meta-analysis) of diagnostic test accuracy (DTA) studies.                                                                                                                                                                                                                                                                                                                                | 1                  |
| Abstract                        | 2  | Abstract: See PRISMA-DTA for abstracts.                                                                                                                                                                                                                                                                                                                                                                                                  | 2                  |
| <b>INTRODUCTION</b>             |    |                                                                                                                                                                                                                                                                                                                                                                                                                                          |                    |
| Rationale                       | 3  | Describe the rationale for the review in the context of what is already known.                                                                                                                                                                                                                                                                                                                                                           | 3                  |
| Clinical role of index test     | D1 | State the scientific and clinical background, including the intended use and clinical role of the index test, and if applicable, the rationale for minimally acceptable test accuracy (or minimum difference in accuracy for comparative design).                                                                                                                                                                                        |                    |
| Objectives                      | 4  | Provide an explicit statement of question(s) being addressed in terms of participants, index test(s), and target condition(s).                                                                                                                                                                                                                                                                                                           | 5                  |
| <b>METHODS</b>                  |    |                                                                                                                                                                                                                                                                                                                                                                                                                                          |                    |
| Protocol and registration       | 5  | Indicate if a review protocol exists, if and where it can be accessed (e.g., Web address), and, if available, provide registration information including registration number.                                                                                                                                                                                                                                                            | 6                  |
| Eligibility criteria            | 6  | Specify study characteristics (participants, setting, index test(s), reference standard(s), target condition(s), and study design) and report characteristics (e.g., years considered, language, publication status) used as criteria for eligibility, giving rationale.                                                                                                                                                                 | 6                  |
| Information sources             | 7  | Describe all information sources (e.g., databases with dates of coverage, contact with study authors to identify additional studies) in the search and date last searched.                                                                                                                                                                                                                                                               | 7                  |
| Search                          | 8  | Present full search strategies for all electronic databases and other sources searched, including any limits used, such that they could be repeated.                                                                                                                                                                                                                                                                                     | 7                  |
| Study selection                 | 9  | State the process for selecting studies (i.e., screening, eligibility, included in systematic review, and, if applicable, included in the meta-analysis).                                                                                                                                                                                                                                                                                | 7                  |
| Data collection process         | 10 | Describe method of data extraction from reports (e.g., piloted forms, independently, in duplicate) and any processes for obtaining and confirming data from investigators.                                                                                                                                                                                                                                                               | 7                  |
| Definitions for data extraction | 11 | Provide definitions used in data extraction and classifications of target condition(s), index test(s), reference standard(s) and other characteristics (e.g. study design, clinical setting).                                                                                                                                                                                                                                            |                    |
| Risk of bias and applicability  | 12 | Describe methods used for assessing risk of bias in individual studies and concerns regarding the applicability to the review question.                                                                                                                                                                                                                                                                                                  | 8                  |
| Diagnostic accuracy measures    | 13 | State the principal diagnostic accuracy measure(s) reported (e.g. sensitivity, specificity) and state the unit of assessment (e.g. per-patient, per-lesion).                                                                                                                                                                                                                                                                             |                    |
| Synthesis of results            | 14 | Describe methods of handling data, combining results of studies and describing variability between studies. This could include, but is not limited to: a) handling of multiple definitions of target condition. b) handling of multiple thresholds of test positivity, c) handling multiple index test readers, d) handling of indeterminate test results, e) grouping and comparing tests, f) handling of different reference standards | 8                  |

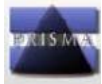

# PRISMA-DTA Checklist

1  
2  
3  
4  
5  
6  
7  
8  
9  
10  
11  
12  
13  
14  
15  
16  
17  
18  
19  
20  
21  
22  
23  
24  
25  
26  
27  
28  
29  
30  
31  
32  
33  
34  
35  
36  
37  
38  
39  
40  
41  
42  
43  
44  
45  
46  
47

| Section/topic                  | #  | PRISMA-DTA Checklist Item                                                                                                                                                                                                                                                                         | Reported on page # |
|--------------------------------|----|---------------------------------------------------------------------------------------------------------------------------------------------------------------------------------------------------------------------------------------------------------------------------------------------------|--------------------|
| Meta-analysis                  | D2 | Report the statistical methods used for meta-analyses, if performed.                                                                                                                                                                                                                              | 9                  |
| Additional analyses            | 16 | Describe methods of additional analyses (e.g., sensitivity or subgroup analyses, meta-regression), if done, indicating which were pre-specified.                                                                                                                                                  | 9                  |
| <b>RESULTS</b>                 |    |                                                                                                                                                                                                                                                                                                   |                    |
| Study selection                | 17 | Provide numbers of studies screened, assessed for eligibility, included in the review (and included in meta-analysis, if applicable) with reasons for exclusions at each stage, ideally with a flow diagram.                                                                                      | 11                 |
| Study characteristics          | 18 | For each included study provide citations and present key characteristics including: a) participant characteristics (presentation, prior testing), b) clinical setting, c) study design, d) target condition definition, e) index test, f) reference standard, g) sample size, h) funding sources | 12                 |
| Risk of bias and applicability | 19 | Present evaluation of risk of bias and concerns regarding applicability for each study.                                                                                                                                                                                                           | 16                 |
| Results of individual studies  | 20 | For each analysis in each study (e.g. unique combination of index test, reference standard, and positivity threshold) report 2x2 data (TP, FP, FN, TN) with estimates of diagnostic accuracy and confidence intervals, ideally with a forest or receiver operator characteristic (ROC) plot.      | 16                 |
| Synthesis of results           | 21 | Describe test accuracy, including variability; if meta-analysis was done, include results and confidence intervals.                                                                                                                                                                               | 17                 |
| Additional analysis            | 23 | Give results of additional analyses, if done (e.g., sensitivity or subgroup analyses, meta-regression; analysis of index test: failure rates, proportion of inconclusive results, adverse events).                                                                                                | 18                 |
| <b>DISCUSSION</b>              |    |                                                                                                                                                                                                                                                                                                   |                    |
| Summary of evidence            | 24 | Summarize the main findings including the strength of evidence.                                                                                                                                                                                                                                   | 21                 |
| Limitations                    | 25 | Discuss limitations from included studies (e.g. risk of bias and concerns regarding applicability) and from the review process (e.g. incomplete retrieval of identified research).                                                                                                                | 21                 |
| Conclusions                    | 26 | Provide a general interpretation of the results in the context of other evidence. Discuss implications for future research and clinical practice (e.g. the intended use and clinical role of the index test).                                                                                     | 22                 |
| <b>FUNDING</b>                 |    |                                                                                                                                                                                                                                                                                                   |                    |
| Funding                        | 27 | For the systematic review, describe the sources of funding and other support and the role of the funders.                                                                                                                                                                                         |                    |

Adapted From: McInnes MDF, Moher D, Thoms BD, McGrath TA, Bossuyt PM, The PRISMA-DTA Group (2018). Preferred Reporting Items for a Systematic Review and Meta-analysis of Diagnostic Test Accuracy Studies: The PRISMA-DTA Statement. JAMA. 2018 Jan 23;319(4):388-396. doi: 10.1001/jama.2017.19163.

For more information, visit: [www.prisma-statement.org](http://www.prisma-statement.org).



# BMJ Open

## Assessing the effect of empathy-enhancing interventions in health education and training: A systematic review of randomised controlled trials

|                                 |                                                                                                                                                                                                                                                                                                                        |
|---------------------------------|------------------------------------------------------------------------------------------------------------------------------------------------------------------------------------------------------------------------------------------------------------------------------------------------------------------------|
| Journal:                        | <i>BMJ Open</i>                                                                                                                                                                                                                                                                                                        |
| Manuscript ID                   | bmjopen-2019-036471.R1                                                                                                                                                                                                                                                                                                 |
| Article Type:                   | Original research                                                                                                                                                                                                                                                                                                      |
| Date Submitted by the Author:   | 13-Jul-2020                                                                                                                                                                                                                                                                                                            |
| Complete List of Authors:       | Winter, Rachel; University of Leicester, Health Sciences<br>Issa, Eyad; University of Leicester, Health Sciences<br>Roberts, Nia; University of Oxford, UK, Bodleian Health Care Libraries,<br>Norman, Robert; University of Leicester, Health Sciences<br>Howick, Jeremy; University of Oxford, Faculty of Philosophy |
| <b>Primary Subject Heading</b>: | Medical education and training                                                                                                                                                                                                                                                                                         |
| Secondary Subject Heading:      | Patient-centred medicine                                                                                                                                                                                                                                                                                               |
| Keywords:                       | MEDICAL EDUCATION & TRAINING, EDUCATION & TRAINING (see Medical Education & Training), STATISTICS & RESEARCH METHODS                                                                                                                                                                                                   |
|                                 |                                                                                                                                                                                                                                                                                                                        |

SCHOLARONE™  
Manuscripts



I, the Submitting Author has the right to grant and does grant on behalf of all authors of the Work (as defined in the below author licence), an exclusive licence and/or a non-exclusive licence for contributions from authors who are: i) UK Crown employees; ii) where BMJ has agreed a CC-BY licence shall apply, and/or iii) in accordance with the terms applicable for US Federal Government officers or employees acting as part of their official duties; on a worldwide, perpetual, irrevocable, royalty-free basis to BMJ Publishing Group Ltd ("BMJ") its licensees and where the relevant Journal is co-owned by BMJ to the co-owners of the Journal, to publish the Work in this journal and any other BMJ products and to exploit all rights, as set out in our [licence](#).

The Submitting Author accepts and understands that any supply made under these terms is made by BMJ to the Submitting Author unless you are acting as an employee on behalf of your employer or a postgraduate student of an affiliated institution which is paying any applicable article publishing charge ("APC") for Open Access articles. Where the Submitting Author wishes to make the Work available on an Open Access basis (and intends to pay the relevant APC), the terms of reuse of such Open Access shall be governed by a Creative Commons licence – details of these licences and which [Creative Commons](#) licence will apply to this Work are set out in our licence referred to above.

Other than as permitted in any relevant BMJ Author's Self Archiving Policies, I confirm this Work has not been accepted for publication elsewhere, is not being considered for publication elsewhere and does not duplicate material already published. I confirm all authors consent to publication of this Work and authorise the granting of this licence.

1  
2  
3 **Assessing the effect of empathy-enhancing interventions in health education and training:**  
4  
5 **A systematic review of randomised controlled trials**  
6  
7

8 **Rachel Winter (0000-0002-8775-2461), Eyad Issa, Nia Roberts, Robert I Norman, Jeremy**  
9

10 **Howick**  
11  
12  
13  
14

15 Rachel Winter  
16

17 Academic Clinical Lecturer  
18

19 College of Life Sciences, University of Leicester, George Davies Centre, Leicester, England LE1 7RH  
20  
21

22 Eyad Issa  
23

24 Academic Clinical Lecturer  
25

26 College of Life Sciences, University of Leicester, George Davies Centre, Leicester, England LE1 7RH  
27  
28

29 Robert I Norman  
30

31 Director of Learning and Teaching  
32

33 College of Life Sciences, University of Leicester, George Davies Centre, Leicester, England LE1 7RH  
34  
35

36 Nia Roberts  
37

38 Librarian  
39

40 Bodleian Health Care Libraries, University of Oxford, Oxford, England  
41

42 Jeremy Howick  
43

44 Director, Oxford Empathy Programme  
45

46 Faculty of Philosophy, University of Oxford, Oxford, England  
47  
48

49 **Correspondence to:** Rachel Winter [rw205@le.ac.uk](mailto:rw205@le.ac.uk), College of Life Sciences, George Davies Centre,  
50

51 University Road, Leicester, England LE1 7RH  
52  
53  
54  
55

56 Word Count: 4000  
57  
58  
59  
60

**ABSTRACT**

**Objective:** To estimate the effect of empathy interventions in health education and training from randomised controlled trials (RCTs).

**Methods:** MEDLINE, PsycINFO, EMBASE, CINAHL and Cochrane databases were searched from inception to June 2019 for RCTs investigating the effect of empathy-enhancing interventions in medical and healthcare students and professionals. Studies measuring any aspect of 'clinical empathy' as a primary or secondary outcome were included. Two reviewers extracted data and assessed risk of bias of eligible studies using the Cochrane Risk of Bias Tool. Random effects meta-analyses of the impact of empathy training on participants' empathy levels were performed.

**Results:** Twenty-six trials were included, with 22 providing adequate data for meta-analysis. An overall moderate effect on participant empathy post-intervention (standardised mean difference 0.52, 95% confidence interval 0.36 to 0.67) was found. Heterogeneity across trial results was substantial ( $I^2=63\%$ ). Data on sustainability of effect was provided by 11 trials and found a moderate effect size for improved empathy up until 12 weeks (0.69 95% confidence interval 0.23 to 1.15), and a small but statistically significant effect size for sustainability at 12 weeks and beyond (standardised mean difference 0.34 95% confidence interval 0.11 to 0.57). In total 15 studies were considered to be either unclear or high risk of bias. The quality of evidence of included studies was low.

**Conclusions:** Findings suggest empathy-enhancing interventions can be effective at cultivating and sustaining empathy with intervention specifics contributing to effectiveness. This review focuses on an important, growing area of medical education, and provides guidance to those looking to develop effective interventions to enhance empathy in the

1  
2  
3 healthcare setting. Further high quality trials are needed that include patient-led outcome  
4  
5 assessments and further evaluate the long-term sustainability of empathy training.  
6  
7

8 **Protocol registration:** PROSPERO registration number (CRD42019126843).  
9  
10

### 11 12 13 **Strengths and limitations of this study** 14

- 15  
16  
17 • This is an up-to-date review that excludes non-randomised studies, follows a pre-  
18  
19 published protocol, and measures the longer term effects of empathy training.  
20  
21
- 22  
23 • The quality of the review was limited by the reporting quality of some of the  
24  
25 included studies.  
26  
27
- 28  
29 • The studies in our review were heterogeneous, which we anticipated.  
30  
31
- 32  
33 • We found only four studies that followed-up participants for at least three months,  
34  
35

## 36 **INTRODUCTION** 37

### 38 **Rationale** 39

40  
41 Clinical empathy has multiple benefits for patient care[1-4] and practitioner health.[5, 6]  
42  
43 Indeed, person-centred and empathic care are central to all professional healthcare  
44  
45 education.[7] Empathy in the clinical setting has been defined in various ways[8] and can be  
46  
47 considered as a multidimensional construct incorporating affective, cognitive, behavioural  
48  
49 and moral components.[9] A widely accepted definition of clinical empathy involves the  
50  
51 ability to understand the patient's situation, perspective and feelings, communicate that  
52  
53 understanding to them, and act on it in a helpful and therapeutic way.[10] There is still  
54  
55 however, little consensus on the precise nature of clinical empathy, not least reflected in  
56  
57  
58  
59  
60

1  
2  
3 the variety of tools and scales available to measure it. No guidance exists on how to select  
4  
5 measures for assessing clinical empathy and choice of tools is likely to be led by the  
6  
7 definition of empathy used or specific domain being measured.[11] A recent systematic  
8  
9 review[11] on empathy measurement tools for care professionals identifies certain  
10  
11 measures as scoring highest for quality, but concedes even these had low scores in some of  
12  
13 the criteria they used.  
14  
15  
16

17  
18  
19 Although contested by some,[12,13] there is evidence that empathy in medical and  
20  
21 healthcare students declines during undergraduate education.[14-16] Researchers agree  
22  
23 that empathetic skills can be taught [17-20] and cultivating empathy to protect against a  
24  
25 possible decline would seem sensible. No standard empathy-curriculum for healthcare  
26  
27 training currently exists and empathy-based training does not appear routinely in healthcare  
28  
29 education.[14] Understanding what type of empathy training is most effective in healthcare  
30  
31 at both cultivating and sustaining empathy would be a useful start in preparing one.  
32  
33  
34  
35  
36  
37  
38  
39

40 Four systematic reviews of empathy-promoting interventions have been conducted.[17,20-  
41  
42 22] Kelm et al[17] conducted a qualitative synthesis of empathy-cultivating interventions for  
43  
44 medical students or physicians. Their findings support the hypothesis that interventions can  
45  
46 increase physician and medical student empathy. However, they also identified a lack of  
47  
48 rigorous study design in most studies (such as lack of control groups). More recently,  
49  
50 Vassilios et al[20] published a systematic review of randomised control trials (RCTs) of  
51  
52 empathy-promoting interventions for health professionals. However, only two out of 17  
53  
54 included reported change in empathy as a primary outcome, focusing instead on general  
55  
56 communication skills. Hence, the review did not provide robust evidence of empathy-  
57  
58  
59  
60

1  
2  
3 enhancing interventions. In 2019, Patel et al[21] reviewed educational interventions aimed  
4 at enhancing both empathy and/or compassion. They included observational as well as  
5  
6 randomised studies and looked only at physicians and physicians-in-training. They were not  
7  
8 able to pool their results statistically and did not investigate whether potential benefits of  
9  
10 empathy were sustained over time. With the most recent review, Frakgos and Paul[22]  
11  
12 conclude that empathy interventions significantly increase empathy, but limit their study  
13  
14 population to medical students only. In addition, they do not explore whether any  
15  
16 improvement in empathy is sustained over time.  
17  
18  
19  
20  
21  
22  
23  
24

25 These problems listed above present barriers for medical educators looking to implement  
26  
27 empathy training into their curricula. It is unclear how large the effect size of effective  
28  
29 empathy training is; whether the effect is sustained over time; or how best to train students  
30  
31 and continuing learners from various health backgrounds. It is important to measure the  
32  
33 effect of empathy training, both post-intervention and sustainability of effect over time.  
34  
35 Arthur et al. [23] found no effect of empathy training immediately after the training, but  
36  
37 significant improvement 12 weeks after the end of the training. A delayed improvement in  
38  
39 empathy could potentially be accounted for by participants only recognising the benefits of  
40  
41 training once they are putting any lessons learnt into action.  
42  
43  
44  
45  
46  
47  
48  
49

50 In this systematic review and meta-analysis we addressed these gaps, with an up-to-date  
51  
52 synthesis of RCTs of interventions aimed at promoting empathy, delivered to both medical  
53  
54 and healthcare students and professionals, with results that are generalisable to all  
55  
56 healthcare contexts. In addition, we will consider both immediate and longer-term impact  
57  
58 of interventions on empathy.  
59  
60

## Objectives

The overarching objective of this systematic review and meta-analysis is to combine data from all available RCTs of empathy-enhancing educational interventions in health education and training. This was achieved with two subsidiary objectives:

- (1) to assess the effectiveness of empathy-enhancing interventions aiming to enhance empathy in undergraduate and postgraduate health education and training; and
- (2) to assess any lasting effect of empathy training.

We also had three secondary aims:

- (1) to identify the intervention type (e.g. communication skills training) that is most effective at enhancing empathy;
- (2) to identify the duration of training that is most effective; and
- (3) to identify the tools used to measure empathy levels in participants to consider differences in self-reported and observer-reported measures.

## METHODS

### Protocol and registration

In accordance with the Cochrane Handbook for systematic reviews of interventions,[24] we published a protocol for this systematic review,[25] registered with PROSPERO international prospective register of systematic reviews (registration number CRD42019126843). We followed the Preferred Reporting Items for Systematic Reviews and Meta-Analyses (PRISMA) guidelines.[26]

### Eligibility criteria



1  
2  
3 Randomised controlled trials (RCTs) investigating the effect of empathy-enhancing  
4 interventions on medical and other healthcare students' and professionals' empathy levels  
5 as a primary or secondary outcome were eligible for inclusion. Trials measuring empathy  
6 via self- and/or observer-reported measures were included. See eMethods in the  
7 supplement for further details.  
8  
9  
10  
11  
12  
13  
14  
15  
16  
17

### 18 **Information sources and search strategies**

19  
20 The following databases were searched from inception to 6 June 2019: MEDLINE, PsycINFO,  
21 EMBASE, CINAHL and Cochrane. Search strategies are detailed within eTable 1 in the  
22 Supplement. Electronic searches were supplemented by hand-searching the references of  
23 retrieved papers.  
24  
25  
26  
27  
28  
29  
30  
31  
32

### 33 **Study selection**

34 All studies retrieved through the search strategy were stored using EndNote with duplicates  
35 removed. Two authors (RW and EI) reviewed titles and abstracts to identify those meeting  
36 inclusion criteria. Full text manuscripts were retrieved for potentially relevant articles. If the  
37 decision to include or exclude was unclear, the study was discussed with a third author (JH)  
38 to reach a consensus. Seven papers were discussed with the third author. A PRISMA flow  
39 chart recorded the screening and selection process.  
40  
41  
42  
43  
44  
45  
46  
47  
48  
49  
50  
51  
52

### 53 **Data collection**

54  
55  
56 One reviewer (RW) extracted, summarised and recorded data to assess quality and  
57 synthesise evidence from included studies. A second author (JH) independently extracted a  
58  
59  
60

1  
2  
3 random sample (10%) of studies to ensure agreement on the information extracted and  
4  
5 summarised. See eMethods for details on information extracted. If data was not reported,  
6  
7 study authors were contacted.  
8  
9

### 10 11 12 13 14 **Risk of bias in individual studies** 15

16  
17 Risk of bias was assessed using the Cochrane Collaboration's Tool for assessing the risk of  
18 bias in clinical trials (see eMethods in the supplement for further details). Using the criteria  
19 provided by Higgins (2011)[24], each item was scored as high, low or unclear risk of bias,  
20 and evidence from the study was used to justify each score given. Given that evidence  
21 increasingly suggests that sequence generation and allocation concealment are of particular  
22 importance in determining the overall risk of bias,[24] a study was classed as being at high  
23 risk of bias if it scored as high or unclear risk on either of these domains.  
24  
25  
26  
27  
28  
29  
30  
31  
32  
33  
34  
35

### 36 **Synthesis of results** 37

38  
39 We calculated the overall effect size of empathy interventions using the standardised mean  
40 difference (SMD) and 95% confidence intervals (CI) based on the data provided in the  
41 studies: post-intervention sample size, mean and standard deviation (SD) for experimental  
42 versus control group (except where only mean difference and SD between pre- and post-  
43 intervention for the experimental and control groups were provided). We used a random  
44 effects model (REM) to allow for likely different (though related) intervention effects. If a  
45 study had more than one intervention arm, we used the results for the most comprehensive  
46 training intervention. If a study provided measures of empathy using different tools, the  
47  
48  
49  
50  
51  
52  
53  
54  
55  
56  
57  
58  
59  
60

1  
2  
3 primary tool to measure empathy was used. If it was unclear which was the primary  
4  
5 measure, we used the first reported measure of empathy.  
6  
7  
8  
9

10 Heterogeneity was anticipated between studies and assessed using Cochran's Q Statistic  
11  
12 (heterogeneity was declared if p-value <0.10) and quantified using the I<sup>2</sup> statistic, with an I<sup>2</sup>  
13  
14 value of 50% or more being considered to represent levels of heterogeneity.  
15  
16  
17  
18  
19

20 Primary analysis included all studies providing the data needed to calculate the mean and  
21  
22 SD (or standard error (SE)) of the post-intervention control and intervention groups. Where  
23  
24 studies provided more than one point for outcome assessment, the data closest to the end-  
25  
26 point of the intervention was used. Studies that provided no numerical data on empathy-  
27  
28 related outcomes or data from which it was not possible to calculate mean values and SD  
29  
30 were excluded from the meta-analysis.  
31  
32  
33  
34  
35  
36  
37  
38

### 39 **Additional analyses**

40  
41  
42 We performed a sensitivity analysis excluding studies that were considered to be at high risk  
43  
44 of bias (scoring unclear or high risk of bias for either sequence generation or allocation  
45  
46 concealment, with evidence suggesting these domains are of particular importance in  
47  
48 establishing risk of bias).[24]  
49  
50  
51  
52  
53

54 We conducted separate meta-analyses to look at: sustainability of the effects of the  
55  
56 intervention; the intervention type that is most effective; the duration of intervention that  
57  
58 is most effective; the outcome assessment tools (comparing objective and subjective  
59  
60

1  
2  
3 outcome measures); and participant populations (effectiveness of interventions aimed at  
4 student populations compared with those aimed at professional populations). See  
5 eMethods in supplement for further details.  
6  
7  
8  
9

### 10 11 **Risk of bias across studies**

12  
13  
14  
15 Reporting bias was assessed qualitatively based on inspection of the characteristics of the  
16 studies included. A funnel plot was produced to investigate small study effects, which may  
17 indicate the presence of publication bias. The GRADE system was used to evaluate the  
18 overall quality of evidence for the primary outcome.[27]  
19  
20  
21  
22  
23  
24  
25  
26  
27  
28  
29

### 30 31 **Patient and public involvement**

32 This research was done without patient involvement. Patients were not invited to comment on the  
33 study design and were not consulted to develop patient relevant outcomes or interpret the results.  
34  
35 Patients were not invited to contribute to the writing or editing of this document for readability or  
36 accuracy.  
37  
38  
39  
40  
41  
42  
43  
44  
45  
46

## 47 **RESULTS**

### 48 49 **Study selection**

50  
51  
52 The literature search resulted in 4,904 citations with duplicates removed. Figure 1 provides  
53 an overview of the selection process (see eResults in the Supplement for further details).  
54  
55 Seventy-two articles were retrieved for full-text review. Forty-six studies were excluded  
56  
57  
58  
59  
60

(eTable 2 in the Supplement). Twenty-six trials were included.[23,28-52] (n=2,900) Table 1 provides a summary of characteristics (eTable 3 in the Supplement gives further details).

Table 1. Summary of characteristics of included studies

| Study                  | Year | County             | No. participants | Participant type                        | Intervention type             | Duration of intervention (hours) | Outcome assessor | Outcome measure         | Effect of intervention                                                   |
|------------------------|------|--------------------|------------------|-----------------------------------------|-------------------------------|----------------------------------|------------------|-------------------------|--------------------------------------------------------------------------|
| <b>Alhassan</b>        | 2019 | Ghana              | 210              | Nursing and midwifery students          | Communication skills training | 12                               | Self             | JSE                     | No significant effect found                                              |
| <b>Arthur</b>          | 2017 | UK                 | 112              | Health care assistants                  | Perspective-taking training   | 12                               | Self             | JSE                     | No significant effect found                                              |
| <b>Blair Irvine</b>    | 2012 | USA                | 172              | Health care professionals               | Mixed                         | 4                                | Self             | VST                     | Significant effect found                                                 |
| <b>Buffel Du Vaure</b> | 2017 | France             | 352              | Medical students                        | Balint group                  | 10.5                             | Self<br>Observer | JSE<br>CARE             | Mixed.<br>No significant effect for JSE, significant effect for CARE     |
| <b>Butow</b>           | 2007 | Australia          | 30               | Physicians                              | Communication skills training | 15                               | Observer         | CRP                     | No significant effect found                                              |
| <b>Collins</b>         | 2017 | USA                | 25               | Student pharmacists                     | Literature intervention       | 2                                | Self             | JSE                     | No significant effect found                                              |
| <b>Daniels</b>         | 1998 | Canada             | 53               | Nursing students                        | Communication skills training | 18                               | Self<br>Self     | ECRS<br>CIC             | Significant effect found                                                 |
| <b>Foster</b>          | 2016 | USA                | 70               | Medical students                        | Communication skills training | NE                               | Observer         | ECCS                    | Significant effect found                                                 |
| <b>Gholamzadeh</b>     | 2018 | Iran               | 63               | Nursing students                        | Empathy skills training       | 8                                | Self             | JSE                     | Significant effect found                                                 |
| <b>Gould</b>           | 2017 | UK                 | 249              | Nursing staff and healthcare assistants | Mixed                         | NE                               | Self             | JSE                     | No significant effect found                                              |
| <b>Hastings</b>        | 2018 | UK                 | 236              | Qualified care staff                    | Mixed                         | 3                                | Self             | SECBQ                   | No significant effect found                                              |
| <b>Hattink</b>         | 2015 | Netherlands and UK | 142              | Qualified care staff                    | Mixed                         | NE                               | Self             | IRI                     | Significant effect found                                                 |
| <b>Larti</b>           | 2014 | Iran               | 82               | Nursing students                        | Communication skills training | 12                               | Self             | JSE                     | Significant effect found                                                 |
| <b>Lobchuck</b>        | 2018 | Canada             | 44               | Nursing staff and students              | Perspective-taking training   | 2.66                             | Observer<br>Self | CARE<br>CARE (modified) | Mixed.<br>No significant effect found for CARE. Significant effect found |

|                    |      |             |     |                           |                                 |      |                  |                             |                                                                                        |
|--------------------|------|-------------|-----|---------------------------|---------------------------------|------|------------------|-----------------------------|----------------------------------------------------------------------------------------|
|                    |      |             |     |                           |                                 |      |                  |                             | on modified CARE                                                                       |
| <b>Lor</b>         | 2014 | USA         | 40  | Student pharmacists       | Perspective-taking training     | 18   | Self             | JSE                         | Significant effect found                                                               |
| <b>LoSasso</b>     | 2017 | USA         | 70  | Medical students          | Communication skills training   | 1    | Self             | JSE                         | No significant effect found                                                            |
| <b>Mueller</b>     | 2001 | USA         | 37  | Physical therapy students | Mixed                           | 11   | Self             | JSE                         | Significant effect found                                                               |
| <b>Reiss</b>       | 2012 | USA         | 99  | Physicians                | Empathy skills training         | 4    | Observer<br>Self | CARE<br>JSE<br>BEES<br>EFDT | Mixed<br>No significant effect found for CARE, JSE, BEES. Significant effect for EFDT  |
| <b>Shapiro</b>     | 1998 | USA         | 78  | Medical students          | Mindfulness training            | 17.5 | Self             | ECRS                        | Significant effect found                                                               |
| <b>Sripada</b>     | 2010 | USA         | 12  | Physicians                | Psychotherapy intervention      | NE   | Observer         | BLRI                        | Significant effect found                                                               |
| <b>Sterkenburg</b> | 2018 | Netherlands | 224 | Qualified care staff      | Serious game                    | 0.33 | Self             | SQ                          | Significant effect found                                                               |
| <b>Tulsky</b>      | 2011 | USA         | 48  | Physicians                | Communication skills training   | NE   | Observer         | ES<br>EO<br>PE              | Significant effect found                                                               |
| <b>Vaghee</b>      | 2018 | Iran        | 127 | Nursing students          | Perspective-taking training     | 3    | Self             | JSE                         | Significant effect found                                                               |
| <b>Wolf</b>        | 1987 | Canada      | 134 | Medical students          | Communication skills training   | 12   | Self             | HRI<br>MCI                  | Significant effect found                                                               |
| <b>Wundrich</b>    | 2017 | Germany     | 158 | Medical students          | Empathy skills training         | 6    | Self<br>Observer | JSE<br>OSCE                 | Mixed.<br>No significant effect found for JSE. Significant effect found on OSCE scores |
| <b>Yang</b>        | 2018 | China       | 177 | Nursing students          | Narrative medicine intervention | 42   | Self             | JSE                         | Significant effect found                                                               |

## Study characteristics

Study publication dates ranged from 1987 to 2019, with 15 out of 26 trials published in the last five years.[23,28,30,32,34-38,40,42,47,49,51,52] Thirteen were carried out in the USA and Canada,[29,32-34,40-43,45,46,48,50] seven in Europe,[23,30,36-38,47,51] three in

1  
2  
3 Iran,[35,39,49] and one each in Australia,[31] Ghana[28] and China.[52] Fourteen studies  
4 provided a definition of empathy.[30,32,34-37,40,43-47,51,52]  
5  
6  
7  
8  
9

## 10 **Study design**

11  
12 Sample size ranged from 12 to 352 participants (median of 90.5; interquartile range (IQR)  
13 49.25-154). Twelve studies had 100 or more participants.[23,28-29,36-38,47,49-51] Seven  
14 had fewer than 50 participants.[31,32,40,41,43,46,48] Fifteen studies evaluated empathy  
15 interventions for student populations,[28,30,32-35,39,41,42,43,45,49-52] including seven  
16 which looked at medical students,[30,34,35,42,45,50,51] five with nursing  
17 students,[33,39,40,50,52] two with student pharmacists,[32,41] one with physiotherapy  
18 students,[43] and one with a mixed nursing and midwifery student population.[28] Ten trials  
19 used professional/qualified populations,[23,29,30,36-38,44,46-48] with four of these  
20 focusing on physicians,[31,44,46,48] one on nurses,[36] and five with qualified care staff,  
21 including healthcare assistants.[23,29,37,38,47] One study used a mixed student and  
22 professional population (nursing students and nurse practitioners).[40]  
23  
24  
25  
26  
27  
28  
29  
30  
31  
32  
33  
34  
35  
36  
37  
38  
39  
40  
41  
42  
43  
44  
45  
46  
47  
48  
49  
50  
51  
52  
53  
54  
55  
56

57 Five trials used multiple sites,[23,30,36,37,40] and five were cluster RCTs.[23,36,37,49,52]  
58 Ten studies defined both inclusion and exclusion criteria for the study.[23,28-  
59 29,35,37,39,41,49,52] Thirteen defined inclusion criteria only[30-33,36,38,40,42,43,45-  
60 47,50] and in three studies inclusion/exclusion criteria were either not given or were not  
clear.[34,48,51]

## 57 **Study interventions**

1  
2  
3 While the aims of eligible trials in this review were to enhance empathy through an  
4 educational intervention, a range of intervention types were employed. The most  
5 commonly used approach was a communication skills-based training intervention, with  
6 eight studies [28,31,33,34,39,42,48,50] using this. Four studies used perspective-taking  
7 training,[23,40,41,49] two had a psychotherapy focus,[30,46] three used empathy skills-  
8 based training sessions,[35,44,51] two used an arts and humanities approach,[32,52] one  
9 used mindfulness-based training,[45] and one a serious gaming intervention.[47] Five  
10 studies could not be classified and were described as 'mixed' interventions, using various  
11 elements of theoretical knowledge teaching and experiential learning sessions.[29,36-38,43]  
12 Seventeen were specifically designed to foster empathy[23,32,34-37,39-44,46-48,50,52] and  
13 the remainder used interventions not specifically designed to improve empathy but with the  
14 hypothesis that they would. For example, Buffel Du Vaure et al[30] explored the impact of a  
15 psychotherapy-focused 'Balint Group' intervention on medical student empathy.

16  
17  
18  
19  
20  
21  
22  
23  
24  
25  
26  
27  
28  
29  
30  
31  
32  
33  
34  
35  
36 The most frequently used mode of delivery was face-to-face, with eighteen interventions  
37 using this.[23,28,30,31,33,35-37,40-42,44,45,46,49-52] Six interventions were delivered  
38 online,[29,34,38,39,42,47] one employed a self-directed mode of delivery,[32] and one a  
39 CD-ROM to deliver the intervention.[48]

40  
41  
42  
43  
44  
45  
46  
47 Studies ranged in duration of intervention (total time spent participating in the intervention)  
48 from 20 minutes to 42 hours. The mean duration was 10.2 hours (SD 8.8). Five studies did  
49 not explicitly state duration.[34,36,38,46,48] Training packages in six studies were  
50 considered to be 'short duration', lasting three hours or less;[32,37,39,42,47,49] ten were  
51 considered 'medium duration', lasting between four and 12 hours;[23,28-  
52 30,35,39,43,44,50,51] and five were considered 'long duration', lasting more than 12  
53  
54  
55  
56  
57  
58  
59  
60



1  
2  
3 hours.[31,33,41,45,52] Timespan of the interventions ranged from one to 120 days, with a  
4  
5 mean length of 38.5 days (SD 40.2).  
6  
7  
8  
9  
10

## 11 **Outcome measures**

12  
13  
14  
15 Studies used either self-report or other-(objective)report measures to assess a change in  
16  
17 participants' empathy. Objective measures included those completed by patients or experts  
18  
19 (for example faculty staff or trained actors playing simulated patients). Most studies (18)  
20  
21 used only self-report measures.[23,28,29,32,33,35-39,41-43,45,47,48-50,52] Four used  
22  
23 objective measures[31,34,46,48] (with only Tulsy et al[48] using patients rather than  
24  
25 simulated patients or experts as the outcome assessors). Four used a combination of self-  
26  
27 and objective-report tools to measure empathy.[30,40,44,51]  
28  
29  
30  
31  
32

33  
34 The Jefferson Scale of Empathy (JSE)[53] was the most frequently used self-reported  
35  
36 outcome measurement tool, with 13 studies employing it.[23,28,29,32,35,36,39,41-  
37  
38 43,49,51,53] Other self-report tools used included the Balanced Emotional Empathy Scale  
39  
40 (BEES),[54] the Ekman Facial Decoding test,[55] and the Toronto Empathy Questionnaire  
41  
42 (TEQ).[56] The Consultation and Relational Empathy Scale (CARE)[57] was the most  
43  
44 frequently used objective measure of empathy, with three studies employing it.[30,40,44]  
45  
46  
47 Other objective outcome measures included the Carkhuff Empathy Rating Scale.[58] In  
48  
49 addition, some studies developed their own measures of empathy, for example Tulsy et  
50  
51 al[48] used a Likert scale with ten items to assess perceived oncologist empathy. Butow et  
52  
53 al[31] created a manual to code transcripts of videoed patient interactions to assess  
54  
55 empathic behaviour, in addition to using the CARE scale.[57] All studies except  
56  
57  
58  
59  
60

1  
2  
3 three[29,31,48] employed a validated tool to measure empathy.  
4  
5  
6  
7  
8

### 9 **Outcome assessment strategy**

10  
11  
12 Timeframes for measuring outcomes varied. Fifteen studies did not specify a timeframe for  
13 post-intervention measurements or were unclear.[31-33,35,36-38,40,41,43-48,49-52] For  
14  
15 example, Hastings et al[37] reported measuring empathy six-weeks post-randomisation but  
16  
17 were not clear how long after the intervention had ended that this measurement was taken.  
18  
19 For studies that were explicit, post-intervention measures varied between two days and six  
20  
21 months, with the majority of measures taken within two weeks of the intervention.[23,28-  
22  
23 30,32,41,48] Eleven studies measured the effects at one or more follow-up points (in  
24  
25 addition to the post-intervention measurement),[23,28,29,31,33,35,37,39,41,49,52] which  
26  
27 varied between four weeks and 18 months.  
28  
29  
30  
31  
32  
33  
34  
35  
36  
37  
38  
39

### 40 **Risk of bias within studies**

41  
42  
43 In total, 11 studies[23,28,31,36-39,43,45,47,48] were considered to be at low risk of bias  
44  
45 overall (low risk of bias for sequence generation and allocation concealment).[24] Thirteen  
46  
47 were considered to be low risk for random sequence generation[23,28,31,35-7,43,47,48]  
48  
49 and 11 were low risk for allocation concealment.[23,28,31,6-39,43,44,47,48] Blinding was  
50  
51 not possible in the majority of studies due to the nature of the interventions (often  
52  
53 described to participants as empathy-promoting) and the method of outcome assessment  
54  
55 (for example self-report questionnaires, making explicit what is being measured, such as the  
56  
57  
58  
59  
60

1  
2  
3 JSE). Full details of the risk of bias assessment are reported in the eResults of the  
4  
5 Supplement with eFigure 1 illustrating the overall findings.  
6  
7  
8  
9  
10  
11  
12

### 13 **Results of individual studies**

14  
15

16 The majority of studies (19/26) found that the tested intervention significantly improved  
17  
18 empathy on at least one outcome measure.[29,30,33-35,38-41,43-52] Seven studies did not  
19  
20 find any significant increase in empathy.[23,28,31,32,36,37,42] Of the studies that reported  
21  
22 a significant improvement in empathy on at least one outcome measure, 11 were aimed at  
23  
24 student populations (representing approximately 73% of student population studies)[30,33-  
25  
26 35,41,43,45,49-52] and seven were aimed at professionals (representing 70% of professional  
27  
28 population studies).[29,38,39,46,47,48,44] Fifteen studies reported a significant  
29  
30 improvement in empathy using a self-rated outcome measure (this represents 68% of  
31  
32 studies (15/22) using a self-report outcome tool).[29,30,33,35,38-41,43,45-47,49,50,52]  
33  
34  
35 Four studies reported an increase in empathy when using an objective measure  
36  
37 (representing 50% (4/8) of studies using an objective outcome measure).[34,44,48,51]  
38  
39  
40 Seventeen studies employed an educational intervention that had been specifically  
41  
42 designed to foster empathy.[23,32,34-37,39-44,46-48,50,52] Of these, 12 (70%) were  
43  
44 successful.[34,5,39-44,46-48,51,52] Four out of five studies that were classed as 'long  
45  
46 duration' (lasting >12 hours) reported a significant improvement in empathy post  
47  
48 intervention;[33,41,45,52] 50% of 'medium duration' studies (between 3 and 12 hours)  
49  
50 reported a significant increase in empathy;[29,35,39,50,51] and 33% of 'short duration'  
51  
52  
53  
54  
55  
56  
57  
58  
59  
60

studies (<3 hours) reported a significant improvement.[47,49]

## Synthesis of results

Of the 26 studies included in this review, four were excluded from meta-analysis as they did not provide adequate data from which to calculate the SMD and SD.[31,36,46,51] For the studies that were excluded from the primary analysis, Butow et al[31] reported a positive but not statistically significant effect and Gould et al[36] found no significant difference between control and intervention groups. Wundrich[51] reported no significant influence of the intervention as measured by the JSE (student version) but did report a positive and statistically significant effect on the observer-assessed outcome. Sripada et al[46] also reported a statistically significant positive effect. Of the 22 studies that had adequate data for pooling, all but one (Arthur et al[23]) showed a benefit of intervention. The primary analysis identified that the overall effect of empathy interventions in terms of improving participant empathy was statistically significant (SMD 0.52, 95% CI 0.36 to 0.67) (figure 2). The Q value indicated significant heterogeneity, with p equal to 0.0001 and I<sup>2</sup> equal to 63%. A summary of findings is presented in table 2.

Table 2. Summary of effect sizes for studies included in meta-analyses

|                                                | Standardised mean difference (95% confidence interval) | Heterogeneity (I <sup>2</sup> ) | References                   |
|------------------------------------------------|--------------------------------------------------------|---------------------------------|------------------------------|
| Overall effect of empathy interventions        | 0.52 (0.36-0.67)                                       | 63%                             | 23,8-30,32-35,37-45,47-49,52 |
| Effect of intervention with least risk of bias | 0.44 (0.19-0.69)                                       | 63%                             | 23,28,37-39,43,44,47,48      |
| Sustainability of effect                       |                                                        |                                 |                              |
| - Follow-up measurement before 12 weeks        | 0.69 (0.23-1.15)                                       | 84%                             | 28,29,35,37,39,49            |
| - Follow-up measurement at 12 weeks or later   | 0.34 (0.11-0.57)                                       | 0%                              | 23,37,41,52                  |
| Effect by type of intervention                 |                                                        |                                 |                              |
| - Communication skills training                | 0.69 (0.32-1.06)                                       | 78%                             | 28,33,34,39,42,48,50         |
| - Perspective-taking training                  | 0.60 (0.17-1.04)                                       | 55%                             | 23,40,41,49                  |
| - Mixed educational programmes                 | 0.39 (0.18-0.61)                                       | 0%                              | 29,37,38,43                  |
| - Empathy skills training                      | 0.60 (-0.02-1.21)                                      | 71%                             | 35,44                        |

|                                     |                   |     |                                     |
|-------------------------------------|-------------------|-----|-------------------------------------|
| - Arts/humanities interventions     | 0.38 (0.03-0.73)  | 0%  | 32,52                               |
| Effect by duration of intervention  |                   |     |                                     |
| - Short (3 hours or less)           | 0.42 (0.21-0.63)  | 24% | 32,37,40,42,47,49                   |
| - Medium (4 to 12 hours)            | 0.51 (0.21-0.80)  | 82% | 23,28,29,30,35,39,43,44,50          |
| - Long (more than 12 hours)         | 0.57 (0.32-0.82)  | 0%  | 33,41,45,52                         |
| Effect by participant population    |                   |     |                                     |
| - Student population                | 0.62 (0.38-0.85)  | 74% | 28,30,32-35,39-43,45,49,50,52       |
| - Professional/qualified population | 0.33 (0.18-0.47)  | 0%  | 23,29,37,38,44,47,48                |
| Effect by outcome assessor          |                   |     |                                     |
| - Self-assessment                   | 0.52 (0.37-0.68)  | 58% | 23,28-30,32,33,35,37-45,47,49,50,52 |
| - Observer-assessment               | 0.28 (-0.18-0.75) | 81% | 30,34,40,44,48                      |

## Additional analyses

### Sensitivity analysis

For the sensitivity analysis of the least biased studies (table 2), 11 were judged to have low risk of bias for random allocation or allocation concealment[23,28,31,36-39,43,44,47,48] and nine of these provided sufficient data to be included in a meta-analysis (figure 3).[23,28,37-39,43,44,47,48]

### Sustainability of improved empathy analysis

Eleven studies provided follow-up data assessing sustainability of changes to empathy, in addition to post-intervention measurement.[23,28,29,31,33,35,37,39,41,49,52] Eight were eligible for inclusion in a sub-group analysis [23,29,35,37,39,41,49,52] (see eResults for further details) which found a moderate effect size for sustainability up to 12 weeks and a smaller, but still significant effect size for sustainability of impact of training at 12 weeks or later (figure 4 and table 2).

### Type of intervention analysis

A meta-analysis comparing sub-groups of different types of intervention (eFigure 2 in the Supplement and eResults for further details) found the greatest effect was with empathy

1  
2  
3 training that was communication skills-based (table 2). The smallest effect reported was for  
4  
5 interventions that were described as 'mixed educational programmes' and ones based in  
6  
7 the arts and humanities (table 2). It is worth noting however that only two studies used arts  
8  
9 and humanities interventions (compared to seven in the communications skills group) and  
10  
11 this may well impact on the effect size.  
12  
13  
14  
15

#### 16 Duration of intervention analysis

17  
18  
19  
20 Interventions of medium and longer duration (eFigure 3 in the Supplement) were most  
21  
22 effective. Interventions of short duration had the smallest effect size (table 2).  
23  
24  
25

#### 26 Participant population analysis

27  
28  
29  
30 Studies using healthcare student participant populations appeared to have a larger effect  
31  
32 size than those directed at professional/qualified populations (eFigure 4 in the Supplement).  
33  
34 Studies included in a sub-analysis of interventions for students showed a moderate effect  
35  
36 size of training, compared to a smaller but still significant effect size for training directed at  
37  
38 professional/qualified populations (table 2).  
39  
40  
41  
42

#### 43 Outcome assessor analysis

44  
45  
46  
47 Studies using a self-assessment outcome scale showed a moderate and significant benefit to  
48  
49 empathy for the intervention tested (eFigure 5), compared to a small and statistically not  
50  
51 significant effect size for observer-assessed outcome studies (table 2).  
52  
53  
54  
55  
56

#### 57 Risk of bias across studies

1  
2  
3 A funnel plot used in the primary meta-analysis (22 studies) did not reveal evidence of  
4 publication bias (figure 5). An evaluation of evidence using GRADE software found the  
5 quality of evidence was low (eTable 4). This was due to a high or uncertain risk of bias based  
6 on random sequence generation and/or allocation concealment in a number of studies and  
7 a high degree of heterogeneity across studies.  
8  
9  
10  
11  
12  
13  
14  
15  
16  
17

## 18 **DISCUSSION**

### 19 **Summary of evidence**

20  
21  
22  
23  
24 Training healthcare practitioners and trainees improved their empathy by a modest amount.  
25  
26 The effect of training seemed to diminish, but lasts to beyond 12 weeks.  
27  
28  
29

### 30 **Comparison with other evidence**

31  
32  
33 Our review supports the evidence of previous similar reviews, finding benefits of empathy  
34 training[17,20,21,22] and that practitioner empathy training makes a difference to  
35 patients.[59] Our study adds to this evidence by providing an estimate of empathy training  
36 from higher quality (randomised) trials, and by showing that the effect lasts well beyond the  
37 intervention.  
38  
39  
40  
41  
42  
43  
44  
45  
46

### 47 **Strengths and limitations**

48  
49  
50 This review, to the best of our knowledge, is the first systematic review and meta-analysis  
51 limited to RCTs of clinical empathy training for all healthcare students and professionals.  
52  
53

54  
55 This is an up-to-date review that excludes non-randomised studies, follows a pre-published  
56 protocol and assesses both the immediate and longer term effects of empathy training. Our  
57  
58  
59  
60

1  
2  
3 broad study population, with both healthcare students and professionals means findings are  
4  
5 generalisable to all areas of healthcare education and training.  
6  
7

8  
9 We chose to include only the results of the primary measure of empathy reported by each  
10  
11 study. Where it was unclear which was the primary measure, we used the measure that was  
12  
13 reported first. We recognise that this might have been biased, as authors may have chosen  
14  
15 to report the most positive outcomes first. However, we found that this was not necessarily  
16  
17 the case. For example, the first measure of empathy reported by Buffel du Vaure et al [30]  
18  
19 (who did not specify which measure was primary) had a smaller effect than the second.  
20  
21  
22

23  
24 We recognise the heterogeneity of the studies in our review and anticipated this. This  
25  
26 means that further research is required to identify the most effective empathy training  
27  
28 methodology. Also, the strength of findings in this review may be limited by the reporting  
29  
30 quality of some of the included studies. A sensitivity analysis of studies of highest quality  
31  
32 found a slightly smaller but still significant effect size. Another limitation in reviewing the  
33  
34 evidence in this field is the multiple tools used by investigators to measure clinical empathy.  
35  
36  
37 With the lack of a definitive definition of clinical empathy and a range of tools measuring  
38  
39 different aspects of empathy, the impact of an intervention may vary depending on the  
40  
41 measurement tool used. This is demonstrated by Reiss et al [44] who found a statistically  
42  
43 significant improvement in empathy when measured using the CARE scale but no significant  
44  
45 changes using the JSE. In contrast Buffel du Vaure [30] reported the opposite. Perhaps  
46  
47 because of the larger sample size or other factors, our review found a benefit of training  
48  
49 independently of how it was measured. A further limitation with this review is that we only  
50  
51 identified four studies that followed participants up for at least three months. The trials  
52  
53  
54  
55  
56  
57  
58  
59  
60



1  
2  
3 identified however found a positive effect. Lastly, we did not measure the qualitative  
4  
5 experiences of participants in this review.  
6  
7

### 8 9 **Implications for research and practice**

10  
11  
12 Interventions for cultivating student and trainee empathy should be further developed and  
13  
14 implemented. Optimizing implementation will require additional qualitative research on the  
15  
16 experiences of empathy teachers and learners. Also, the longer term effects (>12 weeks) of  
17  
18 empathy training has not been studied adequately and future research should address this.  
19  
20 With competition for time and space in both undergraduate and postgraduate healthcare  
21  
22 curriculums, future research in this area needs to be robust. Designers of future trials of  
23  
24 empathy training in healthcare can use the results of this review as a guide to their  
25  
26 intervention development.  
27  
28  
29  
30  
31  
32

### 33 **CONCLUSION**

34  
35  
36 Teaching students and other learners how to enhance empathy is moderately effective over  
37  
38 a sustained period of time and is likely to benefit present and future patients. Future  
39  
40 research should focus on empathy-interventions with patient-led outcome assessment and  
41  
42 on assessing effectiveness of training over more sustained periods of time. Medical  
43  
44 educators and curriculum designers can use this research to think of ways to integrate  
45  
46 empathy training into busy curricula.  
47  
48  
49  
50  
51  
52  
53  
54  
55  
56  
57  
58  
59  
60

1  
2  
3  
4  
5  
6  
7 The Corresponding Author has the right to grant on behalf of all authors and does grant on  
8  
9 behalf of all authors, an exclusive licence (or non exclusive for government employees) on a  
10  
11 worldwide basis to the BMJ Publishing Group Ltd to permit this article (if accepted) to be  
12  
13 published in BMJ editions and any other BMJ PGL products and sublicences such use and  
14  
15 exploit all subsidiary rights, as set out in our licence.  
16  
17  
18  
19

### 20 **CONTRIBUTORSHIP STATEMENT**

21  
22  
23 RW had a lead role in the planning, conduct and reporting of the work described in this  
24  
25 article. EI had an equal role in the conduct of the work described in this article. NR had an  
26  
27 equal role in the conduct of the work described. RN had a supporting role in the planning  
28  
29 and reporting of the work described in this article. JH had an equal role in the planning,  
30  
31 conduct and reporting of the work described in this article. The corresponding author  
32  
33 attests that all listed authors meet authorship criteria and that no others meeting the  
34  
35 criteria have been omitted.  
36  
37  
38  
39  
40  
41

### 42 **COMPETING INTEREST STATEMENT**

43  
44  
45 All authors have completed the Unified Competing Interest form and declare: no support  
46  
47 from any organisation for the submitted work; no financial relationships with any  
48  
49 organisations that might have an interest in the submitted work in the previous three years,  
50  
51 no other relationships or activities that could appear to have influenced the submitted  
52  
53 work.  
54  
55  
56  
57  
58

### 59 **TRANSPARENCY DECLARATION**

1  
2  
3 This manuscript is an honest, accurate and transparent account of the studies being  
4  
5 reported. No important aspects of the review have been omitted.  
6  
7  
8

#### 9 **ETHICAL APPROVAL**

10  
11  
12  
13 Ethical approval was not required.  
14  
15

#### 16 **FUNDING STATEMENT**

17  
18  
19  
20 This research received no specific grant from any funding agency in the public, commercial  
21  
22 or not-for-profit sections.  
23  
24  
25

#### 26 **DATA AVAILABILITY STATEMENT**

27  
28 This is a systematic review of randomised controlled trials. No original datasets generated or  
29  
30 analysed for this study.  
31  
32  
33  
34  
35

#### 36 **FIGURES LEGEND**

37  
38 Figure 1. PRISMA flow diagram  
39

40  
41 Figure 2. Meta-analysis of eligible studies providing adequate data to calculate standardised  
42  
43 mean difference with 95% confidence interval  
44

45  
46 Figure 3. Meta-analysis of eligible studies, excluding those considered to be at high risk of  
47  
48 bias  
49

50  
51 Figure 4. Meta-analysis of studies that provided follow-up observation points to determine  
52  
53 long-term effectiveness of intervention  
54

55  
56 Figure 5. Funnel plot of effect sizes and standard errors.  
57  
58  
59  
60

**REFERENCES**

1. Kim SS, Kaplowitz S, Johnston MV. The effects of physician empathy on patient satisfaction and compliance. *Eval Health Prof.* 2004;27:237-251
2. Vermeire E, Hearnshaw H, Van Royen P, Denekens J. Patient adherence to treatment: three decades of research. A comprehensive review. *J Clin Pharm Ther.* 2001;26(5):331-342
3. Di Blasi Z, Harkness E, Ernst E, Georgiou A, Kleijnen J. Influence of context effects on health outcomes: A systematic review. *Lancet.* 2001;357(9258):757-62
4. Kelley JM, Kraft-Todd G, Schapira L, Kossowsky J, Reiss H. The influences of the patient-clinician relationship on healthcare outcomes: A systematic review and meta-analysis of randomised controlled trials. *PLoS One.* 2014;9(4):e94207
5. Thomas MR, Dyrbye LN, Huntington JL, Lawson KL, Novotny PJ, Sloan JA, Shanafelt TD. How do distress and well-being relate to medical student empathy? A multicentre study. *J Gen Intern Med.* 2007;22(2):177-183
6. DiLalla LF, Hull SK, Dorsey JK. Effect of gender, age and relevant course work on attitudes toward empathy, patient spirituality and physician wellness. *Teach Learn Med.* 2004;16(2):165-170
7. The NHS Constitution for England. Health Education England. Department of Health. 2015. Available at:  
[https://assets.publishing.service.gov.uk/government/uploads/system/uploads/attachment\\_data/file/480482/NHS\\_Constitution\\_WEB.pdf](https://assets.publishing.service.gov.uk/government/uploads/system/uploads/attachment_data/file/480482/NHS_Constitution_WEB.pdf) Accessed 5th February 2019
8. Cummins J and Bennett V. *Compassion in Practice: Nursing, Midwifery and Care Staff, our Vision and Strategy.* Leeds: NHS Commissioning Board, 2012. Available at:

1  
2  
3  
4  
5  
6  
7  
8  
9  
10  
11  
12  
13  
14  
15  
16  
17  
18  
19  
20  
21  
22  
23  
24  
25  
26  
27  
28  
29  
30  
31  
32  
33  
34  
35  
36  
37  
38  
39  
40  
41  
42  
43  
44  
45  
46  
47  
48  
49  
50  
51  
52  
53  
54  
55  
56  
57  
58  
59  
60

<https://www.england.nhs.uk/wp-content/uploads/2012/12/compassion-in-practice.pdf>. Accessed 5<sup>th</sup> February 2019

9. Francis R. Report of the Mid Staffordshire NHS Foundation Trust Public Inquiry: Executive Summary. London: The Stationery Office, 2013. Available at: [https://assets.publishing.service.gov.uk/government/uploads/system/uploads/attachment\\_data/file/279124/0947.pdf](https://assets.publishing.service.gov.uk/government/uploads/system/uploads/attachment_data/file/279124/0947.pdf). Accessed 5<sup>th</sup> February 2019
10. Mercer SW, Reynolds W. Empathy and quality of care. *Br J Gen Pract*. 2002; 52(Suppl):S9-12
11. Hong H, Han A. A systematic review on empathy measurement tools for care professionals. *Educ Gerontol*. 2020;46(2):72-83
12. Colliver JA, Conlee MJ, Verhulst SJ, Dorsey JK. Reports of the decline of empathy during medical education are greatly exaggerated: A re-examination of the research. *Acad Med*. 2010;85(4):588–593
13. Smith KE, Norman GJ, Decety J. The complexity of empathy during medical school training: Evidence for positive changes. *Med Educ*, 2017;51(11):1146-1159
14. Neumann M, Edelhauser F, Tauschel D, et al. Empathy decline and its reasons: A systematic review of studies with medical students and residents. *Acad Med J Assoc Am Med Coll*. 2011;86(8):996-1009
15. Hojat M, Vergare MJ, Maxwell K et al. The devil is in the third year: A longitudinal study of erosion of empathy in medical school. *Acad Med J Assoc Am Med Coll*. 2009;84(9):1182-1191
16. Nunes P, Williams S, Sa B, Stevenson K. A study of empathy decline in students from five health disciplines during their first year of training. *Int J Med Educ*. 2011;2:12-17

- 1  
2  
3 17. Kelm Z, Womer J, Walter JK and Feudtner C. Interventions to cultivate physician  
4  
5 empathy: A systematic review. *BMC Med Educ.* 2014;14:219  
6  
7
- 8 18. Chen D, Lew R, Hershman W, Orlander J. A cross-sectional measurement of medical  
9  
10 student empathy. *J Gen Intern Med.* 2007;22(10):1434-8  
11  
12
- 13 19. Batt-Rawden SA, Chisholm MD, Anton B, Flickinger TE. Teaching empathy to medical  
14  
15 students: An updated, systematic review. *Acad Med.* 2013;88(8):1171-7  
16  
17
- 18 20. Kiosses VN, Karathanos VT, Tatsioni A. Empathy promoting interventions for health  
19  
20 professionals: A systematic review of RCTs. *Journal of Compassionate Health Care.*  
21  
22 2016;3:7  
23  
24
- 25 21. Patel S, Pelletier-Bui A, Smith S, Roberts MB, Kilgannon H, Trzeciak S, Roberts BW.  
26  
27 Curricula for empathy and compassion training in medical education: A systematic  
28  
29 review. *PLoS One.* 2019;14(8):e0221412  
30  
31
- 32 22. Fragkos KC, Crampton PES. The effectiveness of teaching clinical empathy to medical  
33  
34 students: A systematic review and meta-analysis of randomized controlled trials.  
35  
36 *Acad Med.* 2020;95(6):947-957  
37  
38
- 39 23. Arthur A, Maben J, Wharrad H, Aldus C, Sarre S, Schneider J et al. Can Healthcare  
40  
41 Assistant Training (CHAT) improve the relational care of older people? Study  
42  
43 protocol for a pilot cluster randomised controlled trial. *Trials.* 2015;16:559  
44  
45  
46
- 47 24. Higgins JJ and Green S. *The Cochrane Handbook for Systematic Reviews of*  
48  
49 *Interventions Version 5.1.0 [updated March 2011].* Chichester. The Cochrane  
50  
51 *Collaboration, 2011*  
52  
53
- 54 25. Winter R, Roberts N, Howick J. Assessing the effect of empathy-enhancing  
55  
56 interventions in health education and training: A systematic review of randomised  
57  
58  
59  
60

- 1  
2  
3 controlled trials. PROSPERO: International prospective register of systematic  
4  
5 reviews. 2019  
6  
7
- 8 26. Moher D, Liberati A, Tetzlaff J, Altman DG, The PRISMA Group (2009). *Preferred*  
9  
10 *Reporting Items for Systematic Reviews and Meta-Analyses: The PRISMA*  
11  
12 *Statement*. BMJ 2009;339:b2535  
13  
14
- 15 27. Schunemann H, Brozek J and Oxman A. GRADE Handbook for Grading Quality of  
16  
17 Evidence and Strength of Recommendation. Hamilton: Group TGW, 2008  
18  
19
- 20 28. Alhassan M. Effect of a 2-day communication skills training on nursing and midwifery  
21  
22 students' empathy: a randomised controlled trial. BMJ Open 2019;9(3):e023666  
23  
24
- 25 29. Blair Irvine A, Billow MB, Eberhage MG, Seeley JR, McMahon E, Bourgeois M. Mental  
26  
27 illness training for licensed staff in long-term care. Issues Ment Health Nurs  
28  
29 2012;33(3):181-194  
30  
31
- 32 30. Buffel du Vaure C, Lemogne C, Bunge L, Catu-Pinault A, Hoertel N, Ghasarossian C et  
33  
34 al. Promoting empathy among medical students: A two-site randomized controlled  
35  
36 study. J Psychosom Res. 2017;103:102-107  
37  
38
- 39 31. Butow P, Cockburn J, Girgis A, Bowman D, Schofield P, D'Este C et al. Increasing  
40  
41 oncologists' skills in eliciting and responding to emotional cues: Evaluation of a  
42  
43 communication skills training program. Psycho-oncology. 2008;17(3):209-218.  
44  
45
- 46 32. Collins KL, Zweber A, Irwin AN et al. Impact of a fictional reading intervention on  
47  
48 empathy development in student pharmacists. Curr Pharm Teach Learn 2017;9(3):  
49  
50 498-503  
51  
52
- 53 33. Daniels TG, Denny A, Andrews D. Using microcounseling to teach RN nursing  
54  
55 students skills of therapeutic communication. Journal of Nursing Education  
56  
57 1988;27(6):246-252  
58  
59  
60

- 1  
2  
3 34. Foster A, Chaudhary N, Kim T, Waller JL, Wong J, Borish M et al. Using Virtual  
4  
5 Patients to Teach Empathy: A Randomized Controlled Study to Enhance Medical  
6  
7 Students' Empathic Communication. *Simulation in Healthcare: The Journal of The*  
8  
9 *Society for Medical Simulation* 2016;11(3):181-189  
10  
11  
12  
13 35. Gholamzadeh S, Khastavaneh M, Khademian Z, Ghadakpour S. The effects of  
14  
15 empathy skills training on nursing students' empathy and attitudes toward elderly  
16  
17 people. *BMC Med Educ* 2018;18(1):198  
18  
19  
20  
21 36. Gould LJ, Griffiths P, Barker HR, Libberton P, Mesa-Eguiagaray I, Pickering R et al.  
22  
23 Compassionate care intervention for hospital nursing teams caring for older people:  
24  
25 A pilot cluster randomised controlled trial. *BMJ Open* 2018;8(2):e018563  
26  
27  
28 37. Hastings RP, Gillespie D, Flynn S, McNamara R, Taylor Z, Knight R et al. Who's  
29  
30 challenging who training for staff empathy towards adults with challenging  
31  
32 behaviour: cluster randomised controlled trial. *JIDR* 2018;62(9):798-813  
33  
34  
35 38. Hattink B, Meiland F, van der Roest H, Kevern P, Abiuso F, Bengtsson J et al. Web-  
36  
37 Based STAR E-Learning Course Increases Empathy and Understanding in Dementia  
38  
39 Caregivers: Results from a Randomized Controlled Trial in the Netherlands and the  
40  
41 United Kingdom. *J Med Internet Res* 2015;17(10):e241  
42  
43  
44  
45 39. Larti N, Ashouri E, Aarabi A. The effect of an empathy role-play program for  
46  
47 operating room nursing students. *J Educ Eval Health Prof* 2018;15:29  
48  
49  
50 40. Lobchuk M, Hoplock L, Halas G, West C, Dika C, Schroeder W et al. Heart health  
51  
52 whispering: A randomized, controlled pilot study to promote nursing student  
53  
54 perspective-taking on carers' health risk behaviors. *BMC Nurs* 2018;17:21  
55  
56  
57  
58  
59  
60



- 1  
2  
3  
4  
5  
6  
7  
8  
9  
10  
11  
12  
13  
14  
15  
16  
17  
18  
19  
20  
21  
22  
23  
24  
25  
26  
27  
28  
29  
30  
31  
32  
33  
34  
35  
36  
37  
38  
39  
40  
41  
42  
43  
44  
45  
46  
47  
48  
49  
50  
51  
52  
53  
54  
55  
56  
57  
58  
59  
60
41. Lor KB, Truong JTT, Ip EJ, Barnett MJ. A randomized prospective study on outcomes of an empathy intervention among second-year student pharmacists. *Am J Pharm Educ* 2015;79(2):18s
  42. LoSasso AA, Lamberton CE, Sammon M, Berg K, Caruso JW, Cass J et al. Enhancing Student Empathetic Engagement, History-Taking, and Communication Skills During Electronic Medical Record Use in Patient Care. *Acad Med* 2017;92(7):1022-1027
  43. Mueller K, Prins R, de Heer H. An Online Intervention Increases Empathy, Resilience, and Work Engagement Among Physical Therapy Students. *Journal of Allied Health* 2018; 47(3):196-203
  44. Reiss H, Kelley JM, Bailey RW, Dunn EJ, Phillips M. Empathy training for resident physicians: a randomized controlled trial of a neuroscience-informed curriculum. *J Gen Intern Med* 2012;27(10):1280-1286
  45. Shapiro SL, Schwartz GE, Bonner G. Effects of mindfulness-based stress reduction on medical and premedical students. *Journal of Behavioral Medicine* 1998;21(6):581-599
  46. Sripada BN, Henry DB, Jobe TH, Winer JA, Schoeny ME, Gibbons RD. A randomized controlled trial of a feedback method for improving empathic accuracy in psychotherapy. *Psychol Psychother* 2011;84(2):113-127
  47. Sterkenburg PS, Vacaru VS. The effectiveness of a serious game to enhance empathy for care workers for people with disabilities: A parallel randomized controlled trial. *Disability and Health J* 2018;11(4):576-582
  48. Tulskey JA, Arnold RM, Alexander SC, Olsen MK, Jeffrey AS, Rodriguez KL. Enhancing communication between oncologists and patients with a computer-based training program: A randomized trial. *Annals of Internal Medicine* 2011;155(9):593-601

- 1  
2  
3  
4  
5  
6  
7  
8  
9  
10  
11  
12  
13  
14  
15  
16  
17  
18  
19  
20  
21  
22  
23  
24  
25  
26  
27  
28  
29  
30  
31  
32  
33  
34  
35  
36  
37  
38  
39  
40  
41  
42  
43  
44  
45  
46  
47  
48  
49  
50  
51  
52  
53  
54  
55  
56  
57  
58  
59  
60
49. Vaghee S, Loffabadi MK, Salarhaji A, Vaghei N, Hashemi BM. Comparing the Effects of Contact-Based Education and Acceptance and Commitment-Based Training on Empathy toward Mental Illnesses among Nursing Students. *Iranian Journal of Psychiatry* 2018;13(2):119-127
50. Wolf FM, Woolliscroft JO, Calhoun JG, Boxer GJ. A controlled experiment in teaching students to respond to patients' emotional concerns. *J Med Educ* 1987;62(1):25-3
51. Wundrich M, Schwartz C, Feige B, Lemper D, Nissen C, Voderholzer U. Empathy training in medical students - a randomized controlled trial. *Med Teach* 2017;39(10):1096-1098
52. Yang N, Xiao H, Cao Y, Li S, Yan H, Wang Y. Does narrative medicine education improve nursing students' empathic abilities and academic achievement? A randomised controlled trial. *J Int Med Res* 2018;46(8):3306-3317
53. Hojat M, Gonnella JS, Nasca TJ, *et al.* Physician empathy: Definition, components, measurement, and relationship to gender and specialty. *Am J Psychiatry* 2002;159:1563-9
54. Mehrabian A, Epstein N. A measure of emotional empathy. *J Pers.* 1972;40:525-43.
55. Ekman P. *Emotions revealed: Recognizing faces and feelings to improve communication and emotional life.* New York: Holt; 2004
56. Spreng RN, McKinnon MC, Mar RA, Levine B. The Toronto Empathy Questionnaire: scale development and initial validation of a factor-analytic solution to multiple empathy measures. *J Pers Assess* 2009;91:62-71
57. Mercer SW, Maxwell M, Heaney D, Watt GCM. The consultation and relational empathy (CARE) measure: development and preliminary validation and reliability of an empathy-based consultation process measure. *Fam Pract.* 2004;21(6):699-705
58. Carkhuff RR. *Helping and human relations: A primer for lay and professional helpers.* Montreal-Toronto: Holt, Rinehart and Winston Inc
59. Howick J, Moscrop A, Mebius A, Fanshawe T, Lewith G, Bishop FL *et al.* Effects of empathic and positive communication in healthcare consultations: a systematic review and meta-analysis. *J R Soc Med.* 2018;111(70):240-252

1  
2  
3  
4  
5  
6  
7  
8  
9  
10  
11  
12  
13  
14  
15  
16  
17  
18  
19  
20  
21  
22  
23  
24  
25  
26  
27  
28  
29  
30  
31  
32  
33  
34  
35  
36  
37  
38  
39  
40  
41  
42  
43  
44  
45  
46  
47  
48  
49  
50  
51  
52  
53  
54  
55  
56  
57  
58  
59  
60

For peer review only

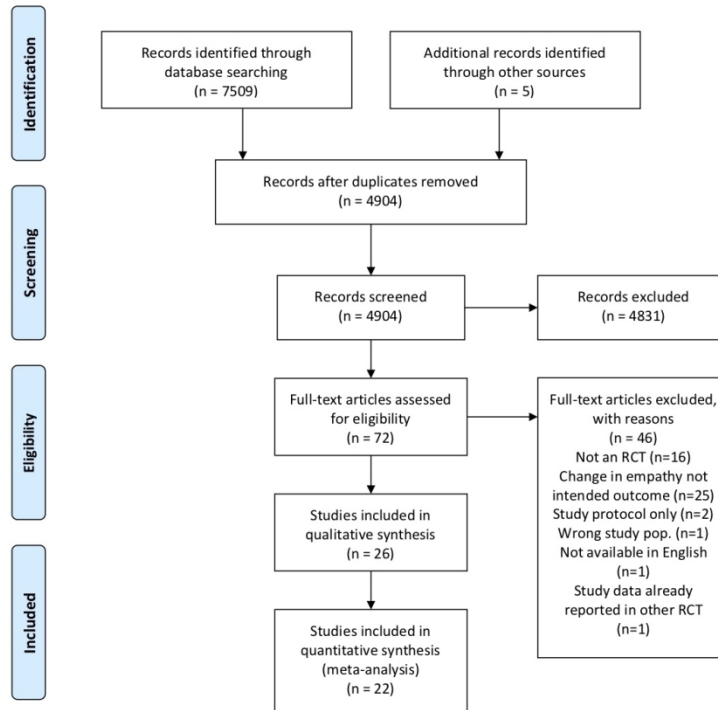

Figure 1. PRISMA flow diagram

209x296mm (150 x 150 DPI)

1  
2  
3  
4  
5  
6  
7  
8  
9  
10  
11  
12  
13  
14  
15  
16  
17  
18  
19  
20  
21  
22  
23  
24  
25  
26  
27  
28  
29  
30  
31  
32  
33  
34  
35  
36  
37  
38  
39  
40  
41  
42  
43  
44  
45  
46  
47  
48  
49  
50  
51  
52  
53  
54  
55  
56  
57  
58  
59  
60

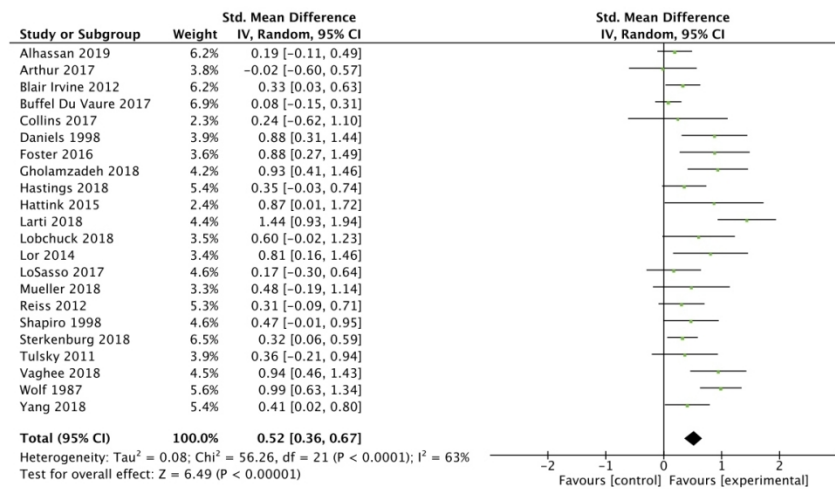

Figure 2. Meta-analysis of eligible studies providing adequate data to calculate standardised mean difference with 95% confidence interval

215x279mm (150 x 150 DPI)

1  
2  
3  
4  
5  
6  
7  
8  
9  
10  
11  
12  
13  
14  
15  
16  
17  
18  
19  
20  
21  
22  
23  
24  
25  
26  
27  
28  
29  
30  
31  
32  
33  
34  
35  
36  
37  
38  
39  
40  
41  
42  
43  
44  
45  
46  
47  
48  
49  
50  
51  
52  
53  
54  
55  
56  
57  
58  
59  
60

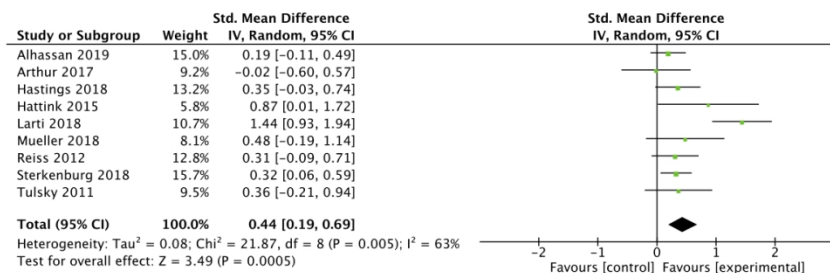

Figure 3. Meta-analysis of eligible studies, excluding those considered to be at high risk of bias

215x279mm (150 x 150 DPI)

1  
2  
3  
4  
5  
6  
7  
8  
9  
10  
11  
12  
13  
14  
15  
16  
17  
18  
19  
20  
21  
22  
23  
24  
25  
26  
27  
28  
29  
30  
31  
32  
33  
34  
35  
36  
37  
38  
39  
40  
41  
42  
43  
44  
45  
46  
47  
48  
49  
50  
51  
52  
53  
54  
55  
56  
57  
58  
59  
60



Figure 4. Meta-analysis of studies that provided follow-up observation points to determine long-term effectiveness of intervention

215x279mm (150 x 150 DPI)

1  
2  
3  
4  
5  
6  
7  
8  
9  
10  
11  
12  
13  
14  
15  
16  
17  
18  
19  
20  
21  
22  
23  
24  
25  
26  
27  
28  
29  
30  
31  
32  
33  
34  
35  
36  
37  
38  
39  
40  
41  
42  
43  
44  
45  
46  
47  
48  
49  
50  
51  
52  
53  
54  
55  
56  
57  
58  
59  
60



Figure 5. Funnel plot of effect sizes and standard errors  
215x279mm (150 x 150 DPI)



1 Winter R, Isa E, Roberts N, Norman RI, Howick J 2019  
2

3 **SUPPLEMENT**  
4

5  
6 **Additional methods (eMethods)**  
7

8  
9  
10 Eligibility criteria  
11

12  
13 Randomised controlled trials (RCTs), including cluster RCTs, which investigated the effect of  
14  
15 empathy-enhancing interventions on medical and other healthcare students and  
16  
17 professionals' empathy levels as a primary or secondary outcome were eligible for inclusion.  
18  
19 We included studies with students and trainees at any level and qualified practitioners from  
20  
21 any health profession (including medicine, dentistry, nursing, pharmacy, midwifery and  
22  
23 allied healthcare professions). Studies measuring any aspect of 'clinical empathy' were  
24  
25 eligible for inclusion. In addition, terminology and measures used in each study were  
26  
27 assessed to ensure that outcomes reported under different terms but using the same  
28  
29 definitions (for example, reporting on compassion taken to mean empathy) would be  
30  
31 captured. Trials measuring empathy via self- and/or observer-reported measures were  
32  
33 included.  
34  
35  
36  
37  
38  
39  
40  
41  
42  
43

44 **Risk of bias in individual studies**  
45

46  
47 Risk of bias was assessed using the Cochrane Collaboration's Tool for assessing the risk of  
48  
49 bias in clinical trials. This recommends the explicit reporting of each individual element of an  
50  
51 RCT: random sequence generation and allocation concealment (selection bias); blinding of  
52  
53 participants and blinding of outcome assessment (detection bias); incomplete outcome data  
54  
55 (attrition bias); and selective reporting (reporting bias). Using the criteria provided by  
56  
57 Higgins (2011)[24], each item was scored as high, low or unclear risk of bias, and evidence  
58  
59  
60

1 Winter R, Isa E, Roberts N, Norman RI, Howick J 2019  
2

3 from the study was used to justify each score given. For cluster RCTs, an additional domain  
4  
5 was assessed: selective recruitment of cluster participants.  
6  
7  
8  
9

### 10 11 12 Additional analyses

13  
14  
15 To assess for sustainability, studies that provided follow-up measurements of the impact of  
16  
17 an empathy intervention were grouped into measurements taken before 12 weeks, and at  
18  
19 12 weeks or later. To evaluate the type of intervention most effective at cultivating  
20  
21 empathy, we divided interventions into communication skills-based training interventions,  
22  
23 perspective-taking interventions, empathy skills-based training, psychotherapy-focused  
24  
25 training, arts and humanities-focused interventions, stress management-focused training,  
26  
27 serious gaming, and mixed educational programmes. Interventions were categorised based  
28  
29 on the descriptions given of the training programmes in each individual study. Where an  
30  
31 intervention could not be put into one or other category, it was allocated to the 'mixed  
32  
33 educational programme' category. To assess impact of duration on cultivating empathy,  
34  
35 interventions were divided on the basis of the length of time participants spent engaging  
36  
37 with the intervention.  
38  
39  
40  
41  
42  
43  
44  
45  
46  
47  
48  
49

### 50 Data collection

51  
52  
53 Data was extracted about: general demographics of the study (first author, date published,  
54  
55 country of origin, whether empathy is defined); study design (participants and recruitment,  
56  
57 inclusion/exclusion criteria, study duration, control conditions); description of the  
58  
59  
60

1 Winter R, Isa E, Roberts N, Norman RI, Howick J 2019

2  
3 intervention (setting, duration and frequency); outcome measures (type of measure,  
4 whether measure is validated); results (sample size, completeness of outcome data, data  
5 that can be used to calculate an effect size); risk of bias and funding source.  
6  
7  
8  
9

## 10 11 12 13 14 **Additional results (eResults)**

### 15 16 17 **Study selection**

18  
19 The literature search resulted in 7,509 citations. EMBASE included 2,754, PsychINFO 1767,  
20  
21  
22  
23  
24  
25  
26  
27  
28  
29  
30  
31  
32  
33  
34  
35  
36  
37  
38  
39  
40  
41  
42  
43  
44  
45  
46  
47  
48  
49  
50  
51  
52  
53  
54  
55  
56  
57  
58  
59  
60  
The literature search resulted in 7,509 citations. EMBASE included 2,754, PsychINFO 1767, CINAHL 381, MEDLINE 2441 and Cochrane 346. An additional five records were identified through other sources. After duplications were removed 4904 citations remained. 4831 citations were excluded after screening abstracts. Seventy-two articles were retrieved for full-text review. Forty-six studies were excluded (eTable 2). The total number of eligible papers included in this review was 26[23,28-52] (n=2,900). See eTable3 for descriptive characteristics.

### 61 62 63 64 65 66 67 68 69 70 71 72 73 74 75 76 77 78 79 80 81 82 83 84 85 86 87 88 89 90 91 92 93 94 95 96 97 98 99 100 **Risk of bias within studies**

#### 101 102 103 104 105 106 107 108 109 110 111 112 113 114 115 116 117 118 119 120 121 122 123 124 125 126 127 128 129 130 131 132 133 134 135 136 137 138 139 140 141 142 143 144 145 146 147 148 149 150 151 152 153 154 155 156 157 158 159 160 **Allocation**

161  
162  
163  
164  
165  
166  
167  
168  
169  
170  
171  
172  
173  
174  
175  
176  
177  
178  
179  
180  
181  
182  
183  
184  
185  
186  
187  
188  
189  
190  
191  
192  
193  
194  
195  
196  
197  
198  
199  
200  
Thirteen studies were considered to be low risk for random sequence generation,[23,28,30,35-40,43,47,48] of which seven employed some form of computer randomisation,[28,36,37,38,40,44,47] one used the minimisation method,[48] one used a random numbers table[31] and three used a low-tech method[27,39,43] (for example a shuffled pack of cards). Thirteen trials were considered to have an unclear risk[29,30,32-34,41,42,45,46,49-52] with 12 of these stating that participants were randomly assigned but not describing the method.[29,32-34,41,42,45,46,49-52] One trial used participants from

1 Winter R, Isa E, Roberts N, Norman RI, Howick J 2019

2  
3 two different sites, using computer randomisation at one site but not describing the method  
4  
5 of randomisation at the other.[30] The risk of bias for allocation concealment was  
6  
7 considered low for 11 studies[23,27,31,36-39,43,44,47,48] and was well described in each  
8  
9 of these. Fifteen studies did not describe or clearly describe allocation concealment and so  
10  
11 were considered unclear in terms of risk.[29,30,32-35,40,41,42,45,46,49-52]  
12  
13  
14  
15  
16  
17

## 18 Blinding

19  
20 Whilst blinding of participants was not possible in the majority of the trials, due to the  
21  
22 nature of the interventions, one study did blind participants.[47] This was achieved by using  
23  
24 an online package to deliver either a 'serious game' (experimental) intervention or a 'digital  
25  
26 reading' (control) intervention. Participants were unaware of which was the control and  
27  
28 which was the experimental intervention so were unaware which they were participating in  
29  
30 once they had been randomly allocated to one or the other. In two trials it was unclear  
31  
32 whether participants had been adequately blinded.[29,34] Similarly, blinding of outcome  
33  
34 assessors was not always possible due to the self-reported nature of outcome assessments  
35  
36 used by many studies. However three studies reported blinding of outcome assessors  
37  
38 [34,47,48] three were unclear if blinding had occurred[29,31,46] and 15 were rated as high  
39  
40 risk as no blinding of outcome assessment had occurred.[27,28,32,33,35-  
41  
42 39,41,43,45,49,50,52] Five studies reported a 'mixed' picture with blinding of the outcome  
43  
44 assessment reported for some outcome measures and not for others.[30,40,42,44,51] For  
45  
46 example Reiss et al [44] used the observer rated CARE scale, blinding the assessors to  
47  
48 physician randomisation and three non-blinded self-rated scales to measure empathy.  
49  
50  
51  
52  
53  
54  
55  
56  
57  
58  
59  
60

Incomplete outcome data

1 Winter R, Isa E, Roberts N, Norman RI, Howick J 2019  
2  
3  
4  
5

6 Incomplete outcome data was considered to be 'low risk' in 19 studies,[23,29-32,34,35,39-  
7  
8 49,52] with attrition rates ranging from 0-16%. The risk was unclear in three  
9  
10 studies[32,50,51 ]and considered high in four.[28,36,37,38]  
11  
12  
13  
14

#### 15 Selective reporting

16  
17 Eighteen trials described all pre-specified outcomes as stated in the methodology.[27-  
18  
19 32,34,37-42,47,48] One trial presented an 'unclear risk' (Daniels et al[33] described  
20  
21 dropping all males from the analysis) and seven studies were high risk for selective  
22  
23 reporting.[35,36,45,49-51] Gould et al[36] for example did not report the data associated  
24  
25 with the JSE questionnaire which was one of the specified outcomes.  
26  
27  
28  
29  
30  
31

#### 32 Other potential sources of bias

33  
34 Five trials were cluster RCTs,[28,36,37,49,52] of which three were considered low risk for  
35  
36 recruitment bias[28,36,37] and two were identified as either unclear or high risk.[49,52]  
37  
38 Eight studies were identified to be at either a high risk or unclear risk from 'other potential  
39  
40 sources of bias.[29,31,33,36,40,46,50,51] For example Butow et al[31] reported differences  
41  
42 between the study groups in baseline characteristics and six other studies did not report  
43  
44 baseline demographics and/or empathy measurements at baseline.  
45  
46  
47  
48  
49  
50  
51  
52

#### 53 Sustainability of improved empathy analysis

54  
55  
56 Eleven studies provided follow-up data assessing sustainability of changes to empathy, in  
57  
58 addition to post intervention measurement.[27-29,31,33,35,37,39,41,49,52] Eight were  
59  
60

1 Winter R, Isa E, Roberts N, Norman RI, Howick J 2019

2  
3 eligible for inclusion in a sub-group analysis.[28,29,35,37,39,41,49,52] One was excluded  
4  
5 from all meta-analyses due to lack of data,[31] one was excluded from this meta-analysis as  
6  
7 the empathy-intervention was delivered to the control group prior to the follow-up  
8  
9 measures being taken,[23] and one was excluded as the follow-up data was not  
10  
11 reported.[33] Studies were divided into two groups; those reporting follow up measures at  
12  
13 less than 12 weeks and those reporting follow up at 12 weeks or later (figure 4). Arthur et  
14  
15 al[23] and Hastings et al[37] provided multiple follow up data at time points that could be  
16  
17 included in both groups (at 8 weeks and 12 weeks, and at 6 weeks and 20 weeks  
18  
19 respectively). Meta-analysis found a moderate effect size for improved empathy until 12  
20  
21 weeks (effect size 0.69 95% CI 0.23-1.15) and a small but statistically significant effect size  
22  
23 for sustainability at 12 weeks and later (effect size 0.34 95% CI 0.11 to 0.57).  
24  
25  
26  
27  
28  
29

### 30 Type of intervention analysis

31  
32  
33  
34  
35 A meta-analysis comparing sub-groups of different types of intervention (eFigure 2) found  
36  
37 the greatest effect was with empathy training that was communication skills-based (effect  
38  
39 size 0.69 [95% confidence interval 0.32 to 1.06]). The smallest effect reported was for  
40  
41 interventions that were described as 'mixed educational programmes' and ones based in  
42  
43 the arts and humanities (effect size 0.39 [95% confidence interval 0.18 to 0.61] and 0.38  
44  
45 [95% confidence interval 0.03 to 0.73] respectively). Interventions labelled as 'empathy  
46  
47 skills-based training' had a positive but not statistically significant overall effect (0.60, 95%  
48  
49 confidence interval -0.02 to 1.21).  
50  
51  
52  
53  
54  
55  
56  
57  
58  
59  
60

Winter R, Isa E, Roberts N, Norman RI, Howick J 2019

eTable 1. Search strategies

| <b>MEDLINE</b> |                                                                                                                                                                                                                                                                                                                                   |         |
|----------------|-----------------------------------------------------------------------------------------------------------------------------------------------------------------------------------------------------------------------------------------------------------------------------------------------------------------------------------|---------|
| # ▲            | Searches                                                                                                                                                                                                                                                                                                                          | Results |
| 1              | exp Students/                                                                                                                                                                                                                                                                                                                     | 116946  |
| 2              | student?.ti,ab.                                                                                                                                                                                                                                                                                                                   | 254787  |
| 3              | (physician? or doctor? or intern? or internship or resident? or residency or nurse? or health* professional? or health* worker? or health* staff*).ti.                                                                                                                                                                            | 295930  |
| 4              | exp Health Personnel/                                                                                                                                                                                                                                                                                                             | 481003  |
| 5              | 1 or 2 or 3 or 4                                                                                                                                                                                                                                                                                                                  | 906748  |
| 6              | exp Education/                                                                                                                                                                                                                                                                                                                    | 767285  |
| 7              | ed.fs.                                                                                                                                                                                                                                                                                                                            | 264737  |
| 8              | ((intervention? or program*) adj5 (train* or educat* or course? or workshop? or staff development or professional development or curriculum or curricula)).ti,ab.                                                                                                                                                                 | 137613  |
| 9              | (train* or educat* or course? or workshop? or staff development or professional development or curriculum or curricula).ti.                                                                                                                                                                                                       | 369134  |
| 10             | (intervention or program*).ti.                                                                                                                                                                                                                                                                                                    | 260613  |
| 11             | 6 or 7 or 8 or 9 or 10                                                                                                                                                                                                                                                                                                            | 1249776 |
| 12             | 5 and 11                                                                                                                                                                                                                                                                                                                          | 335534  |
| 13             | ((physician? or doctor? or surgeon? or intern? or internship or resident? or residency or nurse? or health* professional? or health* worker? or health* staff* or practitioner? or student?) adj5 (train* or educat* or course? or workshop? or staff development or professional development or curriculum or curricula)).ti,ab. | 137434  |
| 14             | 12 or 13                                                                                                                                                                                                                                                                                                                          | 393662  |
| 15             | Empathy/                                                                                                                                                                                                                                                                                                                          | 17455   |
| 16             | (empath* or compassion*).ti,ab.                                                                                                                                                                                                                                                                                                   | 21716   |
| 17             | 15 or 16                                                                                                                                                                                                                                                                                                                          | 31561   |
| 18             | randomized controlled trial.pt.                                                                                                                                                                                                                                                                                                   | 481154  |
| 19             | controlled clinical trial.pt.                                                                                                                                                                                                                                                                                                     | 93050   |
| 20             | randomized.ab.                                                                                                                                                                                                                                                                                                                    | 441413  |
| 21             | placebo.ab.                                                                                                                                                                                                                                                                                                                       | 197236  |
| 22             | drug therapy.fs.                                                                                                                                                                                                                                                                                                                  | 2104120 |
| 23             | randomly.ab.                                                                                                                                                                                                                                                                                                                      | 309893  |

Winter R, Isa E, Roberts N, Norman RI, Howick J 2019

|    |                                                                                                                                                                                                                                                                                      |          |
|----|--------------------------------------------------------------------------------------------------------------------------------------------------------------------------------------------------------------------------------------------------------------------------------------|----------|
| 24 | trial.ab.                                                                                                                                                                                                                                                                            | 461528   |
| 25 | groups.ab.                                                                                                                                                                                                                                                                           | 1906393  |
| 26 | multicenter study.pt.                                                                                                                                                                                                                                                                | 249476   |
| 27 | pragmatic clinical trial.pt.                                                                                                                                                                                                                                                         | 1037     |
| 28 | (multicenter or multi center or multicentre or multi centre).ti.                                                                                                                                                                                                                     | 47574    |
| 29 | (intervention? or effect? or impact? or controlled or control group? or (before adj5 after) or (pre adj5 post) or ((pretest or pre test) and (posttest or post test)) or quasiexperiment* or quasi experiment* or evaluat* or time series or time point? or repeated measur*).ti,ab. | 8937416  |
| 30 | 18 or 19 or 20 or 21 or 22 or 23 or 24 or 25 or 26 or 27 or 28 or 29                                                                                                                                                                                                                 | 11030368 |
| 31 | 14 and 17 and 30                                                                                                                                                                                                                                                                     | 2441     |

| EMBASE |                                                                                                                                                                                                                                                                                   |         |
|--------|-----------------------------------------------------------------------------------------------------------------------------------------------------------------------------------------------------------------------------------------------------------------------------------|---------|
| # ▲    | Searches                                                                                                                                                                                                                                                                          | Results |
| 1      | *student/ or exp *health student/                                                                                                                                                                                                                                                 | 68463   |
| 2      | student?.ti,ab.                                                                                                                                                                                                                                                                   | 326421  |
| 3      | exp *health care personnel/                                                                                                                                                                                                                                                       | 479224  |
| 4      | (physician? or doctor? or intern? or internship or resident? or residency or nurse? or health* professional? or health* worker? or health* staff*).ti.                                                                                                                            | 301997  |
| 5      | 1 or 2 or 3 or 4                                                                                                                                                                                                                                                                  | 941482  |
| 6      | education/ or continuing education/ or curriculum/ or education program/ or in service training/ or lifelong learning/ or exp medical education/ or exp paramedical education/ or postgraduate education/                                                                         | 736812  |
| 7      | ((intervention? or program*) adj5 (train* or educat* or course? or workshop? or staff development or professional development or curriculum or curricula)).ti,ab.                                                                                                                 | 184005  |
| 8      | (train* or educat* or course? or workshop? or staff development or professional development or curriculum or curricula).ti.                                                                                                                                                       | 399259  |
| 9      | (intervention or program*).ti.                                                                                                                                                                                                                                                    | 318923  |
| 10     | 6 or 7 or 8 or 9                                                                                                                                                                                                                                                                  | 1266300 |
| 11     | 5 and 10                                                                                                                                                                                                                                                                          | 281380  |
| 12     | ((physician? or doctor? or surgeon? or intern? or internship or resident? or residency or nurse? or health* professional? or health* worker? or health* staff* or practitioner? or student?) adj5 (train* or educat* or course? or workshop? or staff development or professional | 179470  |



Winter R, Isa E, Roberts N, Norman RI, Howick J 2019

|    |                                                                                                                                                                                                                                                                                      |          |
|----|--------------------------------------------------------------------------------------------------------------------------------------------------------------------------------------------------------------------------------------------------------------------------------------|----------|
|    | development or curriculum or curricula).ti,ab.                                                                                                                                                                                                                                       |          |
| 13 | 11 or 12                                                                                                                                                                                                                                                                             | 369015   |
| 14 | Empathy/                                                                                                                                                                                                                                                                             | 23785    |
| 15 | (empath* or compassion*).ti,ab.                                                                                                                                                                                                                                                      | 28390    |
| 16 | 14 or 15                                                                                                                                                                                                                                                                             | 39458    |
| 17 | 13 and 16                                                                                                                                                                                                                                                                            | 4903     |
| 18 | randomized controlled trial/                                                                                                                                                                                                                                                         | 545326   |
| 19 | single blind procedure/ or double blind procedure/                                                                                                                                                                                                                                   | 192596   |
| 20 | crossover procedure/                                                                                                                                                                                                                                                                 | 58851    |
| 21 | random*.tw.                                                                                                                                                                                                                                                                          | 1400168  |
| 22 | ((singl* or doubl*) adj (blind* or mask*)) or crossover or cross over or factorial* or latin square or assign* or allocat* or volunteer*).ti,ab.                                                                                                                                     | 983905   |
| 23 | pragmatic trial/ or multicenter study/                                                                                                                                                                                                                                               | 213866   |
| 24 | intervention study/                                                                                                                                                                                                                                                                  | 40085    |
| 25 | (multicenter or multi center or multicentre or multi centre).ti.                                                                                                                                                                                                                     | 74011    |
| 26 | (intervention? or effect? or impact? or controlled or control group? or (before adj5 after) or (pre adj5 post) or ((pretest or pre test) and (posttest or post test)) or quasiexperiment* or quasi experiment* or evaluat* or time series or time point? or repeated measur*).ti,ab. | 11312699 |
| 27 | 18 or 19 or 20 or 21 or 22 or 23 or 24 or 25 or 26                                                                                                                                                                                                                                   | 12032330 |
| 28 | (exp animals/ or nonhuman/) not human/                                                                                                                                                                                                                                               | 6212385  |
| 29 | 27 not 28                                                                                                                                                                                                                                                                            | 9294426  |
| 30 | 17 and 29                                                                                                                                                                                                                                                                            | 2574     |

| <b>PsychINFO</b> |                                                                                                                                                                |         |
|------------------|----------------------------------------------------------------------------------------------------------------------------------------------------------------|---------|
| # ▲              | Searches                                                                                                                                                       | Results |
| 1                | students/ or medical students/                                                                                                                                 | 35317   |
| 2                | student?.ti,ab.                                                                                                                                                | 481295  |
| 3                | exp health personnel/                                                                                                                                          | 128154  |
| 4                | (physician? or doctor? or intern? or internship or resident? or residency or nurse? or health* professional? or health* worker? or health* staff*).ti.         | 47232   |
| 5                | 1 or 2 or 3 or 4                                                                                                                                               | 616902  |
| 6                | education/ or exp curriculum/ or distance education/ or nursing education/ or paraprofessional education/ or exp personnel training/ or exp medical education/ | 186066  |

Winter R, Isa E, Roberts N, Norman RI, Howick J 2019

|    |                                                                                                                                                                                                                                                                                                                                   |         |
|----|-----------------------------------------------------------------------------------------------------------------------------------------------------------------------------------------------------------------------------------------------------------------------------------------------------------------------------------|---------|
| 7  | ((intervention? or program*) adj5 (train* or educat* or course? or workshop? or staff development or professional development or curriculum or curricula)).ti,ab.                                                                                                                                                                 | 100952  |
| 8  | (train* or educat* or course? or workshop? or staff development or professional development or curriculum or curricula).ti.                                                                                                                                                                                                       | 207043  |
| 9  | (intervention or program*).ti.                                                                                                                                                                                                                                                                                                    | 121597  |
| 10 | 6 or 7 or 8 or 9                                                                                                                                                                                                                                                                                                                  | 455304  |
| 11 | 5 and 10                                                                                                                                                                                                                                                                                                                          | 166574  |
| 12 | ((physician? or doctor? or surgeon? or intern? or internship or resident? or residency or nurse? or health* professional? or health* worker? or health* staff* or practitioner? or student?) adj5 (train* or educat* or course? or workshop? or staff development or professional development or curriculum or curricula)).ti,ab. | 98357   |
| 13 | 11 or 12                                                                                                                                                                                                                                                                                                                          | 209818  |
| 14 | Empathy/                                                                                                                                                                                                                                                                                                                          | 12489   |
| 15 | (empath* or compassion*).ti,ab.                                                                                                                                                                                                                                                                                                   | 37254   |
| 16 | 14 or 15                                                                                                                                                                                                                                                                                                                          | 38291   |
| 17 | 13 and 16                                                                                                                                                                                                                                                                                                                         | 3043    |
| 18 | random*.ti,ab,hw,id.                                                                                                                                                                                                                                                                                                              | 187448  |
| 19 | trial*.ti,ab,hw,id.                                                                                                                                                                                                                                                                                                               | 172104  |
| 20 | controlled stud*.ti,ab,hw,id.                                                                                                                                                                                                                                                                                                     | 11726   |
| 21 | placebo*.ti,ab,hw,id.                                                                                                                                                                                                                                                                                                             | 38934   |
| 22 | ((singl* or doubl* or trebl* or tripl*) and (blind* or mask*)).ti,ab,hw,id.                                                                                                                                                                                                                                                       | 27892   |
| 23 | (cross over or crossover or factorial* or latin square).ti,ab,hw,id.                                                                                                                                                                                                                                                              | 28819   |
| 24 | (assign* or allocat* or volunteer*).ti,ab,hw,id.                                                                                                                                                                                                                                                                                  | 156473  |
| 25 | treatment effectiveness evaluation/                                                                                                                                                                                                                                                                                               | 22860   |
| 26 | mental health program evaluation/                                                                                                                                                                                                                                                                                                 | 2062    |
| 27 | exp experimental design/                                                                                                                                                                                                                                                                                                          | 54976   |
| 28 | (clinical trial or treatment outcome).md.                                                                                                                                                                                                                                                                                         | 41809   |
| 29 | intervention/                                                                                                                                                                                                                                                                                                                     | 58790   |
| 30 | (multicenter or multi center or multicentre or multi centre).ti.                                                                                                                                                                                                                                                                  | 2788    |
| 31 | (intervention? or effect? or impact? or controlled or control group? or (before adj5 after) or (pre adj5 post) or ((pretest or pre test) and (posttest or post test)) or quasiexperiment* or quasi experiment* or evaluat* or time series or time point? or repeated measur*).ti,ab.                                              | 1834258 |

Winter R, Isa E, Roberts N, Norman RI, Howick J 2019

|    |                                                                                  |         |
|----|----------------------------------------------------------------------------------|---------|
| 32 | 18 or 19 or 20 or 21 or 22 or 23 or 24 or 25 or 26 or 27 or 28 or 29 or 30 or 31 | 2026090 |
| 33 | 17 and 32                                                                        | 1767    |

| CINAHL |                                                                                                                                                                                                                                                                                                                                                                                                                                                                                                                                                                                                                                                                                                                                                                                                                |         |
|--------|----------------------------------------------------------------------------------------------------------------------------------------------------------------------------------------------------------------------------------------------------------------------------------------------------------------------------------------------------------------------------------------------------------------------------------------------------------------------------------------------------------------------------------------------------------------------------------------------------------------------------------------------------------------------------------------------------------------------------------------------------------------------------------------------------------------|---------|
| #      | Query                                                                                                                                                                                                                                                                                                                                                                                                                                                                                                                                                                                                                                                                                                                                                                                                          | Results |
| S17    | S13 AND S16                                                                                                                                                                                                                                                                                                                                                                                                                                                                                                                                                                                                                                                                                                                                                                                                    | 381     |
| S16    | S14 NOT S15                                                                                                                                                                                                                                                                                                                                                                                                                                                                                                                                                                                                                                                                                                                                                                                                    | 556,315 |
| S15    | (MH animals+ OR MH (animal studies) OR TI (animal model*)) NOT MH (human)                                                                                                                                                                                                                                                                                                                                                                                                                                                                                                                                                                                                                                                                                                                                      | 154,114 |
| S14    | MH randomized controlled trials OR MH double-blind studies OR MH single-blind studies OR MH random assignment OR MH pretest-posttest design OR MH cluster sample OR TI (randomised OR randomized) OR AB (random*) OR TI (trial) OR (MH (sample size) AND AB (assigned OR allocated OR control)) OR MH (placebos) OR PT (randomized controlled trial) OR AB (control W5 group) OR MH (crossover design) OR MH (comparative studies) OR AB (cluster W3 RCT)                                                                                                                                                                                                                                                                                                                                                      | 579,579 |
| S13    | S9 AND S12                                                                                                                                                                                                                                                                                                                                                                                                                                                                                                                                                                                                                                                                                                                                                                                                     | 2,335   |
| S12    | S10 OR S11                                                                                                                                                                                                                                                                                                                                                                                                                                                                                                                                                                                                                                                                                                                                                                                                     | 17,823  |
| S11    | TI ( empath* or compassion* ) OR AB ( empath* or compassion* )                                                                                                                                                                                                                                                                                                                                                                                                                                                                                                                                                                                                                                                                                                                                                 | 13,814  |
| S10    | (MH "Empathy")                                                                                                                                                                                                                                                                                                                                                                                                                                                                                                                                                                                                                                                                                                                                                                                                 | 8,360   |
| S9     | S7 OR S8                                                                                                                                                                                                                                                                                                                                                                                                                                                                                                                                                                                                                                                                                                                                                                                                       | 188,626 |
| S8     | TI ( (physician? or doctor? or intern? or internship or resident? or residency or nurse? or "health professional*" or "health worker*" or "health staff*" or "healthcare professional*" or "healthcare worker*" or "healthcare staff*" or "health care professional*" or "health care worker*" or "health care professional*") N5 (train* or educat* or course? or workshop? or "staff development" or "professional development" or curriculum or curricula ) OR AB ( (physician? or doctor? or intern? or internship or resident? or residency or nurse? or "health professional*" or "health worker*" or "health staff*" or "healthcare professional*" or "healthcare worker*" or "healthcare staff*" or "health care professional*" or "health care worker*" or "health care professional*") N5 (train* or | 55,142  |

Winter R, Isa E, Roberts N, Norman RI, Howick J 2019

|    |                                                                                                                                                                                                                                                                                                                                                              |         |
|----|--------------------------------------------------------------------------------------------------------------------------------------------------------------------------------------------------------------------------------------------------------------------------------------------------------------------------------------------------------------|---------|
|    | educat* or course? or workshop? or "staff development" or "professional development" or curriculum or curricula )                                                                                                                                                                                                                                            |         |
| S7 | (S3 AND S6)                                                                                                                                                                                                                                                                                                                                                  | 158,577 |
| S6 | S4 OR S5                                                                                                                                                                                                                                                                                                                                                     | 550,634 |
| S5 | TI ( train* or educat* or course? or workshop? or "staff development" or "professional development" or curriculum or curricula ) OR AB ( ((intervention? or program*) N5 (train* or educat* or course? or workshop? or "staff development" or "professional development" or curriculum or curricula) ) OR TI(intervention? or program*)                      | 349,186 |
| S4 | (MH "Curriculum+") OR (MH "Education, Clinical+") OR (MH "Education, Health Sciences+") OR (MH "Staff Development") OR (MH "Education")                                                                                                                                                                                                                      | 294,559 |
| S3 | S1 OR S2                                                                                                                                                                                                                                                                                                                                                     | 663,254 |
| S2 | TI student? OR AB student? OR TI ( physician? or doctor? or intern? or internship or resident? or residency or nurse? or "health professional*" or "health worker*" or "health staff*" or "healthcare professional*" or "healthcare worker*" or "healthcare staff*" or "health care professional*" or "health care worker*" or "health care professional*" ) | 226,699 |
| S1 | (MH "Students, Health Occupations+") OR (MH "Health Personnel+")                                                                                                                                                                                                                                                                                             | 529,459 |

| COCHRANE |                                                                                                                                                                                                                                                                                                                                             |
|----------|---------------------------------------------------------------------------------------------------------------------------------------------------------------------------------------------------------------------------------------------------------------------------------------------------------------------------------------------|
| ID       | Search                                                                                                                                                                                                                                                                                                                                      |
| #1       | MeSH descriptor: [Students] explode all trees                                                                                                                                                                                                                                                                                               |
| #2       | (student*):ti,ab,kw                                                                                                                                                                                                                                                                                                                         |
| #3       | MeSH descriptor: [Health Personnel] explode all trees                                                                                                                                                                                                                                                                                       |
| #4       | (physician* or doctor* or intern or interns or internship or resident* or residency or nurse* or "health professional*" or "health worker*" or "health staff*" or "healthcare professional*" or "healthcare worker*" or "healthcare staff*" or "health care professional*" or "health care worker*" or "health care professional*"):ti      |
| #5       | #1 or #2 or #3 or #4                                                                                                                                                                                                                                                                                                                        |
| #6       | MeSH descriptor: [Education] explode all trees                                                                                                                                                                                                                                                                                              |
| #7       | (train* or educat* or course* or workshop* or "staff development" or "professional development" or curriculum or curricula):ti OR (intervention* or program*):ti OR (((intervention8 or program*) N5 (train* or educat* or course* or workshop* or "staff development" or "professional development" or curriculum or curricula))):ti,ab,kw |

Winter R, Isa E, Roberts N, Norman RI, Howick J 2019

|     |                                                                                                                                                                                                                                                                                                                                                                                                                                                                                   |
|-----|-----------------------------------------------------------------------------------------------------------------------------------------------------------------------------------------------------------------------------------------------------------------------------------------------------------------------------------------------------------------------------------------------------------------------------------------------------------------------------------|
| #8  | #6 or #7                                                                                                                                                                                                                                                                                                                                                                                                                                                                          |
| #9  | #5 and #8                                                                                                                                                                                                                                                                                                                                                                                                                                                                         |
| #10 | ((physician* or doctor* or intern or interns or internship or resident* or residency or nurse* or "health professional*" or "health worker*" or "health staff*" or "healthcare professional*" or "healthcare worker*" or "healthcare staff*" or "health care professional*" or "health care worker*" or "health care professional*") NEAR/5 (train* or educat* or course? or workshop? or "staff development" or "professional development" or curriculum or curricula)):ti,ab,kw |
| #11 | #9 or #10                                                                                                                                                                                                                                                                                                                                                                                                                                                                         |
| #12 | MeSH descriptor: [Empathy] explode all trees                                                                                                                                                                                                                                                                                                                                                                                                                                      |
| #13 | (empath* or compassion*):ti,ab,kw                                                                                                                                                                                                                                                                                                                                                                                                                                                 |
| #14 | #11 and #13                                                                                                                                                                                                                                                                                                                                                                                                                                                                       |

eTable 2. Characteristics of excluded studies

| Study                 | Reason for exclusions                                                                                                                                                               |
|-----------------------|-------------------------------------------------------------------------------------------------------------------------------------------------------------------------------------|
| Arthur 2015           | Study protocol.                                                                                                                                                                     |
| Bonvicini 2008        | Observational data taken from an RCT. Intervention not specifically designed with outcome of change in empathy. Secondary analysis of data to see if there is an impact on empathy. |
| Bosse 2012            | Change in empathy not a specified outcome of study                                                                                                                                  |
| Bruera 2007           | Change in empathy not measured or intended outcome.                                                                                                                                 |
| Chen 2016             | Not an RCT. Quasi-experimental design, not randomised.                                                                                                                              |
| Chunharas 2013        | Not an RCT                                                                                                                                                                          |
| Daepfen 2012          | Change in empathy is not an intended outcome                                                                                                                                        |
| Danucalov 2017        | Empathy is not an intended outcome of the study. Participants not healthcare students or professionals.                                                                             |
| Delvaux 2005          | Change in empathy not an intended outcome and not measured                                                                                                                          |
| Downar 2016           | Change in empathy not an intended outcome                                                                                                                                           |
| Downar 2017           | Change in empathy is not an intended outcome of the study.                                                                                                                          |
| Dundas 2017           | Participants are not healthcare students/professionals.                                                                                                                             |
| Fallowfield 2002      | Empathy is not directly measured                                                                                                                                                    |
| Fine 1977             | Not an RCT                                                                                                                                                                          |
| Gibson 2013           | Change in empathy not an intended outcome                                                                                                                                           |
| Gorniewicz 2016       | Change in empathy not an intended outcome and is not measured                                                                                                                       |
| Hojat 2013            | Not an RCT. Experimental control groups without randomisation.                                                                                                                      |
| Jaury 2018            | Analysis of data already reported in RCT                                                                                                                                            |
| Johnson 2013          | Not an RCT. Controls selected from a waitlist group and intervention participants from a group who were due to undergo training in a set time-period.                               |
| Kahriman 2016         | Change in empathy is not intended outcome                                                                                                                                           |
| Klein 1999            | Change in empathy is not measured                                                                                                                                                   |
| Liao 2016             | Not an RCT. Quasi-experimental design                                                                                                                                               |
| Lienard 2010          | Change in empathy not an intended outcome                                                                                                                                           |
| Lim 2011              | Change in empathy not an intended outcome                                                                                                                                           |
| Little 2015           | Change in empathy not intended outcome of study and not specifically measured                                                                                                       |
| Misra-Herbert 2012    | Not an RCT                                                                                                                                                                          |
| Nasr Esfahani 2014    | No control arm, comparison between two groups receiving same training, one as distant learning, one as attendants on course.                                                        |
| Nixon 2018            | Not an RCT. Quasi-experimental design "partial randomisation was conducted" with participants designated to their preference group                                                  |
| Oz 2001               | Not an RCT.                                                                                                                                                                         |
| Perula de Torres 2019 | Study protocol only                                                                                                                                                                 |

Winter R, Isa E, Roberts N, Norman RI, Howick J 2019

|                  |                                                                                                                        |
|------------------|------------------------------------------------------------------------------------------------------------------------|
| Potash 2014      | No control arm "mixed-methods quantitative-qualitative study"                                                          |
| Rask 2009        | Empathy not measured as an outcome                                                                                     |
| Razavi 2002      | Change in empathy is not an intended outcome                                                                           |
| Razavi 2003      | Empathy not explicitly measured as an outcome                                                                          |
| Rosenzweig 2016  | Not an RCT                                                                                                             |
| Roter 1995       | Unclear whether intervention is looking to cultivate empathy and whether change in empathy is an intended outcome      |
| Schroeder 2018   | Change in empathy is not an intended outcome of the study                                                              |
| Shapiro 2004     | Not an RCT                                                                                                             |
| Shapiro 2009     | Not an RCT                                                                                                             |
| Shapiro 2011     | Change in empathy is not an intended outcome                                                                           |
| Smith 1995       | Change in empathy is not intended outcome                                                                              |
| Tamura 2017      | Only available in Japanese                                                                                             |
| Van Dijk 2017    | Change in empathy is not an intended aim of the study                                                                  |
| Van Vilet 2017   | Not an RCT. Exploratory, controlled, quasi-experimental study using students not on a specific course as control group |
| Weatherdale 2018 | Correspondence and not research study                                                                                  |
| West 2014        | Change in empathy is not an intended outcome.                                                                          |

eTable 3. Characteristics of included studies

Alhassan 2019

|                      |                                                                                                                                                                                                                                                                                                                                                                                                    |
|----------------------|----------------------------------------------------------------------------------------------------------------------------------------------------------------------------------------------------------------------------------------------------------------------------------------------------------------------------------------------------------------------------------------------------|
| <b>Methods</b>       | Randomised controlled trial                                                                                                                                                                                                                                                                                                                                                                        |
| <b>Participants</b>  | The country of origin was Ghana.<br>104 students were randomised to the intervention group and 106 to the control group.<br>The inclusion criteria were nursing and midwifery students in their second year of training, above age 18 and available for follow-up data collection after 6 months.<br>The exclusion criteria included students not studying at Tamale Nursing and Midwifery College |
| <b>Interventions</b> | Communication Skills Training (CST) developed by author (MA) using 'Four Habits Model' and 'PCNF' (person-centred nursing framework).<br>The mode of delivery were small group discussions, brainstorming, personal experience from participants, group reports, roleplaying, questions and answers, videos and summaries. The duration was 2 days and frequency was one off.                      |
| <b>Outcomes</b>      | The outcome was empathy measured with JSE HPS version<br>Outcome assessment 2 days post intervention and 6 months post intervention                                                                                                                                                                                                                                                                |
| <b>Notes</b>         | -                                                                                                                                                                                                                                                                                                                                                                                                  |

*Risk of bias table*

| Bias                                                      | Authors' judgement | Support for judgement                                                                                                                                                                                                                                                                                         |
|-----------------------------------------------------------|--------------------|---------------------------------------------------------------------------------------------------------------------------------------------------------------------------------------------------------------------------------------------------------------------------------------------------------------|
| Random sequence generation (selection bias)               | Low risk           | "NMS were separated before random assignment to ensure that both professions were approximately equally represented in the groups"<br><br>"The researcher (MA) and research assistants conducted this by allowing participants to pick numbers written on papers, which had been randomly shuffled in a box." |
| Allocation concealment (selection bias)                   | Low risk           | "There was allocation concealment to the researcher, research assistants and the participants. The researcher (MA) and research assistants conducted this by allowing participants to pick numbers written on papers, which had been randomly shuffled in a box."                                             |
| Blinding of participants and personnel (performance bias) | High risk          | "The participants were made aware of empathy being an outcome of this study and since JSE is self-reported, it may have impacted their self-report."                                                                                                                                                          |

Winter R, Isa E, Roberts N, Norman RI, Howick J 2019

|                                                 |           |                                                                                                                                                                                                                      |
|-------------------------------------------------|-----------|----------------------------------------------------------------------------------------------------------------------------------------------------------------------------------------------------------------------|
| Blinding of outcome assessment (detection bias) | High risk | "The participants were made aware of empathy being an outcome of this study and since JES is self-reported, it may have impacted their self-report."<br>"The data was analysed by the author (MA) without blinding." |
| Incomplete outcome data (attrition bias)        | Low risk  | 11 participants in intervention group and 26 in control were excluded from analysis due to incomplete data or outcome measures not returned.                                                                         |
| Selective reporting (reporting bias)            | Low risk  | Outcomes reported as pre-determined                                                                                                                                                                                  |
| Other bias                                      | Low risk  | No other bias detected                                                                                                                                                                                               |

Arthur 2017

|                      |                                                                                                                                                                                                                                                                                                                                                                                                                                                                                                                                                                    |
|----------------------|--------------------------------------------------------------------------------------------------------------------------------------------------------------------------------------------------------------------------------------------------------------------------------------------------------------------------------------------------------------------------------------------------------------------------------------------------------------------------------------------------------------------------------------------------------------------|
| <b>Methods</b>       | Pilot cluster randomised controlled trial                                                                                                                                                                                                                                                                                                                                                                                                                                                                                                                          |
| <b>Participants</b>  | The country of origin was UK.<br>Clusters were wards within three acute hospital trusts in England.<br>General medical, stroke or care of the elderly/older people wards were eligible. Specialist dementia wards and medical admissions units were excluded. Health Care Assistants (HCAs) employed full or part time within enrolled wards were eligible to enter trial. Bank staff and not part of the named staff on ward roster were ineligible.<br>In total 59 Health Care Assistants were randomised to the intervention group and 53 to the control group. |
| <b>Interventions</b> | 'Older People's Shoes' training intervention that focuses on relational care of older people. The mode of delivery was small group teaching led by nurses who had received full training in content and delivery of the intervention from a member of the research team. The setting was the hospital, the duration of the intervention was 2 weeks and frequency was 1 half day session for 2 consecutive days followed by a weeks break and then repeated.                                                                                                       |
| <b>Outcomes</b>      | HCA outcomes were empathy, as measured by The Toronto Empathy Questionnaire (TEQ) at baseline and post intervention at 8 and 12 weeks post randomisation.                                                                                                                                                                                                                                                                                                                                                                                                          |
| <b>Notes</b>         | -                                                                                                                                                                                                                                                                                                                                                                                                                                                                                                                                                                  |

Risk of bias table

| Bias                                                      | Authors' judgement | Support for judgement                                                                                                                                                                                                                                                                          |
|-----------------------------------------------------------|--------------------|------------------------------------------------------------------------------------------------------------------------------------------------------------------------------------------------------------------------------------------------------------------------------------------------|
| Random sequence generation (selection bias)               | Low risk           | "Stratified by NHS hospital trust, wards were randomly allocated by the Norwich Clinical Trials Unit. Each ward had an equal chance of receiving either Older People's Shoes training for HCAs or TAU. Random allocation was generated via computer-written code using block sizes of four"    |
| Allocation concealment (selection bias)                   | Low risk           | "To conceal allocation from those responsible for recruitment, randomisation took place immediately after baseline measures were completed and 4 weeks ahead of the start of the intervention (set-up period) to allow appropriate arrangements, including HCA staffing cover to be arranged." |
| Blinding of participants and personnel (performance bias) | High risk          | "At a number of ward-based meetings during the 4-week baseline period, HCAs were given information about the study"                                                                                                                                                                            |
| Blinding of outcome assessment (detection bias)           | High risk          | Not described. Outcome measure is self-reported                                                                                                                                                                                                                                                |
| Incomplete outcome data (attrition bias)                  | High risk          | "For HCAs, completion of questionnaires was 72 out of 112 (64.2%) at baseline, 52 out of 112 (46.4%) at the first follow-up and 40 out of 112 (35.7%) at the second follow-up."                                                                                                                |
| Selective reporting (reporting bias)                      | Low risk           | Outcomes are reported as per methodology                                                                                                                                                                                                                                                       |
| Other bias                                                | Low risk           | Recruitment bias considered to be low risk: "Each ward had an equal chance of receiving either Older People's Shoes training for HCAs or TAU".                                                                                                                                                 |

Winter R, Isa E, Roberts N, Norman RI, Howick J 2019

## Blair Irvine 2012

|                      |                                                                                                                                                                                                                                                                                                                                                                                                                                                                                                                                                                                                                                                                                                       |
|----------------------|-------------------------------------------------------------------------------------------------------------------------------------------------------------------------------------------------------------------------------------------------------------------------------------------------------------------------------------------------------------------------------------------------------------------------------------------------------------------------------------------------------------------------------------------------------------------------------------------------------------------------------------------------------------------------------------------------------|
| <b>Methods</b>       | Randomised controlled trial                                                                                                                                                                                                                                                                                                                                                                                                                                                                                                                                                                                                                                                                           |
| <b>Participants</b>  | The country of origin was the USA. 84 healthcare professionals were randomised to the intervention group and 88 to the control group.<br>Eligibility criteria included: identification of professional license from a pre-determined list, working in nursing home and assisted living settings<br>Exclusion criteria included: Working as Certified Nursing Assistant, Nursing Assistant, and Home Health Aide, working in a psychiatric/Alzheimer's care units and hospitals, working less than 20 hours per week, a 'moderate' or 'a lot' of self-reported level of mental illness, 'extremely confident' self-reported confidence to deal with resident behaviours associated with mental illness |
| <b>Interventions</b> | Online training designed to develop skills and confidence to deal with symptoms of whatever mental illness was causing a particular behaviour. The mental illness training approach included video modelling vignettes, right-way and wrong-way exemplars, testimonials and narration supplemented by short on-screen text designed to create empathy for residents with mental illness.<br>A minimum 'viewing time' for all online courses was 4 hours with two online 'visits' one week apart.                                                                                                                                                                                                      |
| <b>Outcomes</b>      | Video situational testing (VST) was used to assess participant reactions to short video vignettes of resident behaviour. Four items in VST were used to assess participant empathy towards a resident.                                                                                                                                                                                                                                                                                                                                                                                                                                                                                                |
| <b>Notes</b>         | -                                                                                                                                                                                                                                                                                                                                                                                                                                                                                                                                                                                                                                                                                                     |

*Risk of bias table*

| <b>Bias</b>                                               | <b>Authors' judgement</b> | <b>Support for judgement</b>                                                                                                                                                                                                                                                                                                                                                                                                                                   |
|-----------------------------------------------------------|---------------------------|----------------------------------------------------------------------------------------------------------------------------------------------------------------------------------------------------------------------------------------------------------------------------------------------------------------------------------------------------------------------------------------------------------------------------------------------------------------|
| Random sequence generation (selection bias)               | Unclear risk              | No detail given on how randomisation occurred                                                                                                                                                                                                                                                                                                                                                                                                                  |
| Allocation concealment (selection bias)                   | Unclear risk              | No detail given on allocation of participant                                                                                                                                                                                                                                                                                                                                                                                                                   |
| Blinding of participants and personnel (performance bias) | High risk                 | "After submitting the baseline assessment, treatment participants were e-mailed login information to the Internet training program for Visit 1. One week after logging on to the Visit 1 courses, each participant was sent a second e-mail with log-in information for Visit 2."                                                                                                                                                                              |
| Blinding of outcome assessment (detection bias)           | Unclear risk              | No detail given on how/who assessed video situational vignettes and whether outcome assessors were blinded                                                                                                                                                                                                                                                                                                                                                     |
| Incomplete outcome data (attrition bias)                  | Low risk                  | "Of the 172 study participants 91% completed all three assessment surveys, 6% completed two surveys, and 3% completed one survey Participants who completed all three surveys were compared to those who completed one or two surveys on study condition, demographic characteristics, and all baseline outcome measures. Attrition was not significantly related to any of the measures, which suggests that dropping out of the study did not bias results." |
| Selective reporting (reporting bias)                      | Low risk                  | Outcomes reported as stated in methodology                                                                                                                                                                                                                                                                                                                                                                                                                     |
| Other bias                                                | Unclear risk              | "our measures of empathy and stigma did not provide an in-depth assessment of these constructs, nor is it clear what elements of the training were influential"                                                                                                                                                                                                                                                                                                |

## Buffel Du Vaure 2017

|                |                                                     |
|----------------|-----------------------------------------------------|
| <b>Methods</b> | Two site parallel group randomised controlled trial |
|----------------|-----------------------------------------------------|



## Winter R, Isa E, Roberts N, Norman RI, Howick J 2019

|                      |                                                                                                                                                                                                                                                                                     |
|----------------------|-------------------------------------------------------------------------------------------------------------------------------------------------------------------------------------------------------------------------------------------------------------------------------------|
| <b>Participants</b>  | The country of origin was France<br>176 fourth year medical students were randomised to the intervention group and 176 to the control group from two medical schools.<br>No exclusion criteria were stated.                                                                         |
| <b>Interventions</b> | Balint group training was the intervention with control conditions as 'teaching as usual'.<br>The intervention was delivered in small group discussions held at the university. The duration of the intervention was 10.5 hours delivered in 1.5-hour weekly sessions over 7 weeks. |
| <b>Outcomes</b>      | Empathy was assessed using the observer-rated CARE scale post intervention and JSPE student version self-rated scale pre and post intervention.                                                                                                                                     |
| <b>Notes</b>         | -                                                                                                                                                                                                                                                                                   |

*Risk of bias table*

| <b>Bias</b>                                               | <b>Authors' judgement</b> | <b>Support for judgement</b>                                                                                                                                                                                                                                                                                                                                                                                       |
|-----------------------------------------------------------|---------------------------|--------------------------------------------------------------------------------------------------------------------------------------------------------------------------------------------------------------------------------------------------------------------------------------------------------------------------------------------------------------------------------------------------------------------|
| Random sequence generation (selection bias)               | Low risk                  | "Students from Paris Diderot were randomized with a simple randomization using computer generated random numbers"<br><br>"students from Paris Descartes, we took advantage of the randomization routinely performed each year by university staff to allocate each student to one of three groups, each corresponding to a particular order of the three mandatory 3-month programs of the fourth-year curriculum" |
| Allocation concealment (selection bias)                   | Unclear risk              | "students from Paris Descartes, we took advantage of the randomization routinely performed each year by university staff to allocate each student to one of three groups, each corresponding to a particular order of the three mandatory 3-month programs of the fourth-year curriculum"                                                                                                                          |
| Blinding of participants and personnel (performance bias) | High risk                 | "Participants in the intervention group received a training of 7 sessions of 1.5 hour Balint groups, over 3 months"                                                                                                                                                                                                                                                                                                |
| Blinding of outcome assessment (detection bias)           | Unclear risk              | Outcome assessed both by observer and self.<br>"Whereas students and facilitators were aware of the allocated group, standardized patients, OSCE's observers and data analysts were kept blinded to the allocation". Self-assessment for JSPE so unable to blind outcome assessors (students themselves)                                                                                                           |
| Incomplete outcome data (attrition bias)                  | Low risk                  | 52 lost to follow up but study over recruited to ensure significance level of 5% and power of 80%.<br>14.7% attrition (21 intervention and 32 controls)                                                                                                                                                                                                                                                            |
| Selective reporting (reporting bias)                      | Low risk                  | Primary and secondary outcomes reported as stated in the methods                                                                                                                                                                                                                                                                                                                                                   |
| Other bias                                                | Low risk                  | No other bias detected                                                                                                                                                                                                                                                                                                                                                                                             |

**Butow 2007**

|                      |                                                                                                                                                                                                                                                                                                                                                                                |
|----------------------|--------------------------------------------------------------------------------------------------------------------------------------------------------------------------------------------------------------------------------------------------------------------------------------------------------------------------------------------------------------------------------|
| <b>Methods</b>       | Randomised controlled trial                                                                                                                                                                                                                                                                                                                                                    |
| <b>Participants</b>  | The country of origin was Australia.<br>16 medical and radiation oncologists were randomised to the intervention group and 14 to the control group.<br>All medical and radiation oncologists from six tertiary care hospitals in six Australian cities which incorporated oncology outpatient clinics were invited to participate in the study<br>No exclusion criteria stated |
| <b>Interventions</b> | Communication skills training was an intensive face-to-face workshop incorporating presentation of principles, a DVD modelling ideal behaviour and role-play practice, followed by four 1.5 hour monthly video-conferences incorporating role-play of doctor-generated scenarios.                                                                                              |

Winter R, Isa E, Roberts N, Norman RI, Howick J 2019

|                 |                                                                                                                                                                                                                                                           |
|-----------------|-----------------------------------------------------------------------------------------------------------------------------------------------------------------------------------------------------------------------------------------------------------|
| <b>Outcomes</b> | The outcome was a change in doctor behaviour in eliciting and responding to emotional cues in patients and was measured via coding of a transcript from a filmed role-play at baseline, after completing the training and at 12 months post intervention. |
| <b>Notes</b>    | No funding source stated                                                                                                                                                                                                                                  |

**Risk of bias table**

| Bias                                                      | Authors' judgement | Support for judgement                                                                                                                                                                                                                                                                                                                                                                                      |
|-----------------------------------------------------------|--------------------|------------------------------------------------------------------------------------------------------------------------------------------------------------------------------------------------------------------------------------------------------------------------------------------------------------------------------------------------------------------------------------------------------------|
| Random sequence generation (selection bias)               | Low risk           | "oncologists individually randomised immediately after giving consent and baseline data collection, to receive the training or not. Oncologists were stratified by hospital to ensure approximately equal numbers in the control and intervention arms within each institution, and then randomised within permuted blocks of size 6 constructed by the central research team using a random number table" |
| Allocation concealment (selection bias)                   | Low risk           | "oncologists individually randomised immediately after giving consent and baseline data collection, to receive the training or not."                                                                                                                                                                                                                                                                       |
| Blinding of participants and personnel (performance bias) | High risk          | "Control group doctors were offered training at the completion of the study."<br>"It is possible that intervention doctors shared some study materials with control doctors although they were strictly instructed not to do so"<br>"all doctors were aware that they were being assessed, which likely motivated them to be on 'their best behaviour'"                                                    |
| Blinding of outcome assessment (detection bias)           | Unclear risk       | Does not state whether assessors were blinded                                                                                                                                                                                                                                                                                                                                                              |
| Incomplete outcome data (attrition bias)                  | Unclear risk       | Two controls and two intervention participants lost to follow-up.<br>11.4% overall attrition                                                                                                                                                                                                                                                                                                               |
| Selective reporting (reporting bias)                      | Low risk           | Outcomes reported as stated in methodology                                                                                                                                                                                                                                                                                                                                                                 |
| Other bias                                                | High risk          | Baseline imbalance:<br>"EE and DP scores were significantly higher in the intervention group compared to the control group at baseline".                                                                                                                                                                                                                                                                   |

**Collins 2017**

|                      |                                                                                                                                                                                                                                                                                                                                                                                                     |
|----------------------|-----------------------------------------------------------------------------------------------------------------------------------------------------------------------------------------------------------------------------------------------------------------------------------------------------------------------------------------------------------------------------------------------------|
| <b>Methods</b>       | Randomised controlled trial                                                                                                                                                                                                                                                                                                                                                                         |
| <b>Participants</b>  | The country of origin was USA<br>13 student pharmacists were randomised to the intervention group and 12 to the control group.<br>First through to third year pharmacist students invited to participate. No exclusion criteria stated                                                                                                                                                              |
| <b>Interventions</b> | Students randomized to the literature intervention group were then sent a weekly email that included the reading assignment. Reading assignments were divided into three segments (approximately three to five minutes apiece), and students were requested to complete the readings in three separate sittings throughout the week.<br>The intervention duration was 8 weeks with weekly sessions. |
| <b>Outcomes</b>      | A change in empathy was measured using the JSE-HPS two weeks post end of the intervention.                                                                                                                                                                                                                                                                                                          |
| <b>Notes</b>         | -                                                                                                                                                                                                                                                                                                                                                                                                   |

Winter R, Isa E, Roberts N, Norman RI, Howick J 2019

**Risk of bias table**

| Bias                                                      | Authors' judgement | Support for judgement                                                                                                   |
|-----------------------------------------------------------|--------------------|-------------------------------------------------------------------------------------------------------------------------|
| Random sequence generation (selection bias)               | Unclear risk       | "Participants were randomized into either an intervention or control group."<br>No detail of how randomisation occurred |
| Allocation concealment (selection bias)                   | Unclear risk       | No details given                                                                                                        |
| Blinding of participants and personnel (performance bias) | High risk          | "The announcement was then followed by an email further explaining the study and inviting students to participate."     |
| Blinding of outcome assessment (detection bias)           | Unclear risk       | No details given. However, outcome assessment is self-assessed by participants and participants not blinded.            |
| Incomplete outcome data (attrition bias)                  | Low risk           | Overall attrition rate 16%. (15.4% for intervention group, 16.7% for control group dropout rate)                        |
| Selective reporting (reporting bias)                      | Low risk           | Outcomes reported as stated in results                                                                                  |
| Other bias                                                | Low risk           | No other bias detected                                                                                                  |

**Daniels 1998**

|                      |                                                                                                                                                                                                                                                                                                                                                              |
|----------------------|--------------------------------------------------------------------------------------------------------------------------------------------------------------------------------------------------------------------------------------------------------------------------------------------------------------------------------------------------------------|
| <b>Methods</b>       | Randomised controlled trial                                                                                                                                                                                                                                                                                                                                  |
| <b>Participants</b>  | The country of origin was Canada<br>53 full-time second year nursing students were randomly allocated to either the intervention or control group.<br>Full-time second year female students in a two-year, eight-month registered nurse (RN) diploma program. Males not excluded from study randomisation but were excluded from analysis.                   |
| <b>Interventions</b> | Micro-counselling training divided into six segments with one micro-skill taught per segment including attending behaviour, questioning, minimal encouragers, paraphrasing, reflection of feeling and summarizing.<br>The intervention was delivered face-to-face and training was divided into 6 segments of 3-5 hours with a minimum of 18 hours training. |
| <b>Outcomes</b>      | The Empathy Construct Rating Scale and The Carkhuff Index of Communication (Empathy) self-rated scales were administered to assess changes in empathy post intervention.                                                                                                                                                                                     |
| <b>Notes</b>         | No details on funding source given.                                                                                                                                                                                                                                                                                                                          |

**Risk of bias table**

| Bias                                                      | Authors' judgement | Support for judgement                                                                                                                                                                                                                                                                |
|-----------------------------------------------------------|--------------------|--------------------------------------------------------------------------------------------------------------------------------------------------------------------------------------------------------------------------------------------------------------------------------------|
| Random sequence generation (selection bias)               | Unclear risk       | "Subjects were randomly assigned to either an experimental group or a non-attention control group."<br>No details of how random sequence generated                                                                                                                                   |
| Allocation concealment (selection bias)                   | Unclear risk       | "Subjects were randomly assigned to either an experimental group or a non-attention control group."<br>No details on allocation of students to experimental/control                                                                                                                  |
| Blinding of participants and personnel (performance bias) | High risk          | "During the period of micro-counselling training of the experimental subjects, the control subjects were non-attended. Essentially, the control subjects spent this period of time entirely on their own and received no supervision or structured training experience of any kind." |

## Winter R, Isa E, Roberts N, Norman RI, Howick J 2019

|                                                 |              |                                                                                                                                                                                                                                                                              |
|-------------------------------------------------|--------------|------------------------------------------------------------------------------------------------------------------------------------------------------------------------------------------------------------------------------------------------------------------------------|
| Blinding of outcome assessment (detection bias) | High risk    | No details given of blinding outcome assessors however outcome assessment is self-assessment                                                                                                                                                                                 |
| Incomplete outcome data (attrition bias)        | Unclear risk | "The sample consists of all full-time second year female students (n=60). In all, there are 56 females and 4 males. The males were dropped from the analysis and there was a further attrition of three subjects."                                                           |
| Selective reporting (reporting bias)            | High risk    | The males were dropped from the analysis and there was a further attrition of three subjects                                                                                                                                                                                 |
| Other bias                                      | Unclear risk | No results tables/figures published for the 9-month follow-up data ("At the nine-month follow-up period, the experimental group performed better on all the dependent measures than the control group. However, these differences failed to reach statistical significance") |

## Foster 2016

|                      |                                                                                                                                                                                                                                                                                                                                                                                                                                                                                                                                                                                                                                                                                                                                                                                                                                                                                                                                                  |
|----------------------|--------------------------------------------------------------------------------------------------------------------------------------------------------------------------------------------------------------------------------------------------------------------------------------------------------------------------------------------------------------------------------------------------------------------------------------------------------------------------------------------------------------------------------------------------------------------------------------------------------------------------------------------------------------------------------------------------------------------------------------------------------------------------------------------------------------------------------------------------------------------------------------------------------------------------------------------------|
| <b>Methods</b>       | Randomised controlled trial                                                                                                                                                                                                                                                                                                                                                                                                                                                                                                                                                                                                                                                                                                                                                                                                                                                                                                                      |
| <b>Participants</b>  | The country of origin was USA.<br>35 and 18 medical students were allocated to 2 intervention arms and 17 to a control arm.                                                                                                                                                                                                                                                                                                                                                                                                                                                                                                                                                                                                                                                                                                                                                                                                                      |
| <b>Interventions</b> | Student engagement with a virtual patient (VP). Students interacted with VP online test-based interface. They conducted interviews as they would with live patients, but typed what they wanted to say rather than speaking. The three arms to the study consisted of:<br>-The empathy-feedback VP: Human-assisted empathy feedback is a technique where human 'assessors' anonymously follow online the trainee's interaction with the VP in real time. The assessors' feedback about opportunities to express empathy was available to students for review at the end of the VP interaction<br>-The Backstory VP: Combines embodied conversational agents and narrative video vignettes. When specific questions are asked of the VP, noninteractive video vignettes are presented which show scenes of the VP illustrating their condition.<br>-Control VP: Provides typed interaction with VP without empathy feedback or patient backstory. |
| <b>Outcomes</b>      | The primary outcome was to assess students' verbal responses to all the opportunities to show empathy presented to them by the simulated patients. The Empathic Communication Encoding System (ECCS) (developed to code empathic opportunities, defined as an explicit, clear and direct statement of emotion, progress or challenge by the patient) was used to assess empathy.                                                                                                                                                                                                                                                                                                                                                                                                                                                                                                                                                                 |
| <b>Notes</b>         | -                                                                                                                                                                                                                                                                                                                                                                                                                                                                                                                                                                                                                                                                                                                                                                                                                                                                                                                                                |

*Risk of bias table*

| Bias                                                      | Authors' judgement | Support for judgement                                                                                                                                                                                                                                                                                                                                           |
|-----------------------------------------------------------|--------------------|-----------------------------------------------------------------------------------------------------------------------------------------------------------------------------------------------------------------------------------------------------------------------------------------------------------------------------------------------------------------|
| Random sequence generation (selection bias)               | High risk          | "Students were randomized into one of three groups." No detail on random sequence generation given.                                                                                                                                                                                                                                                             |
| Allocation concealment (selection bias)                   | Unclear risk       | No detail on allocation given.                                                                                                                                                                                                                                                                                                                                  |
| Blinding of participants and personnel (performance bias) | Unclear risk       | "The (VP) assessors were not aware of the students' identity or study group assignment and could not see the students, and the students were not aware of the assessors' presence"                                                                                                                                                                              |
| Blinding of outcome assessment (detection bias)           | Low risk           | "The (VP) assessors were not aware of the students' identity or study group assignment and could not see the students, and the students were not aware of the assessors' presence."<br><br>"Measures were taken to label the transcripts (of SP interactions) in each study group such that the source of the transcript was not identifiable to the assessors" |

Winter R, Isa E, Roberts N, Norman RI, Howick J 2019

|                                          |              |                                                                                     |
|------------------------------------------|--------------|-------------------------------------------------------------------------------------|
|                                          |              | "The SPs (standardised patients) were blinded to students' study group assignment." |
| Incomplete outcome data (attrition bias) | Low risk     | No attrition reported. N=70 randomised and n=70 analysed                            |
| Selective reporting (reporting bias)     | Unclear risk | Study outcomes reported as stated in methodology                                    |
| Other bias                               | Low risk     | No other bias detected                                                              |

Gholamzadeh 2018

|                      |                                                                                                                                                                                                                                                                                                                                                                                                                                                                                                     |
|----------------------|-----------------------------------------------------------------------------------------------------------------------------------------------------------------------------------------------------------------------------------------------------------------------------------------------------------------------------------------------------------------------------------------------------------------------------------------------------------------------------------------------------|
| <b>Methods</b>       | Quasi-experimental randomised controlled design                                                                                                                                                                                                                                                                                                                                                                                                                                                     |
| <b>Participants</b>  | The country of origin was Iran<br>63 third and fourth year medical students were allocated to either the control or intervention group.<br>The inclusion criteria of the study were willingness to participate, being a third- or fourth-year nursing student, and not having taken any empathy courses in the past 6 months. In case the students were unwilling to continue participation in the study or were participating in another educational program at the same time, they were excluded. |
| <b>Interventions</b> | Workshop on empathy skills including self-awareness, and definition and examples of empathy towards patients.<br>The intervention consisted of an 8-hour workshop on empathy skills that was held at the college for 2 days. The content of the workshop was designed by the researchers and reviewed and revised by some of the college professors. The workshop was mainly based on constructivist learning theory.                                                                               |
| <b>Outcomes</b>      | The JSE-HP self-rating scale was used to examine the effects of empathy skills training immediately and 2 months after the intervention.                                                                                                                                                                                                                                                                                                                                                            |
| <b>Notes</b>         | -                                                                                                                                                                                                                                                                                                                                                                                                                                                                                                   |

*Risk of bias table*

| Bias                                                      | Authors' judgement | Support for judgement                                                                                                                                                |
|-----------------------------------------------------------|--------------------|----------------------------------------------------------------------------------------------------------------------------------------------------------------------|
| Random sequence generation (selection bias)               | Low risk           | "the 70 students were randomly divided into a control and an intervention group through block randomization."                                                        |
| Allocation concealment (selection bias)                   | Unclear risk       | "the 70 students were randomly divided into a control and an intervention group through block randomization." No details of allocation to groups post randomisation. |
| Blinding of participants and personnel (performance bias) | High risk          | "All students in the intervention group participated in the same workshop. The students were informed about the date of the workshop in advance."                    |
| Blinding of outcome assessment (detection bias)           | High risk          | Self-rated questionnaire (outcome assessor is participant)                                                                                                           |
| Incomplete outcome data (attrition bias)                  | Low risk           | All participants randomised completed the study                                                                                                                      |
| Selective reporting (reporting bias)                      | High risk          | Outcomes not specifically stated in methodology.                                                                                                                     |
| Other bias                                                | Low risk           | No other bias detected                                                                                                                                               |

Gould 2017

|                     |                                                                                                                                                                                                                                                              |
|---------------------|--------------------------------------------------------------------------------------------------------------------------------------------------------------------------------------------------------------------------------------------------------------|
| <b>Methods</b>      | Multi-site pilot randomised controlled trial (as part of a wider feasibility study)                                                                                                                                                                          |
| <b>Participants</b> | Six ward teams were randomised to either intervention or control groups with a total of 168 nursing staff randomised to the intervention group and 81 to the control group. Medical and surgical wards with high proportion of older patients were eligible. |

Winter R, Isa E, Roberts N, Norman RI, Howick J 2019

|                      |                                                                                                                                                                                                                                                                            |
|----------------------|----------------------------------------------------------------------------------------------------------------------------------------------------------------------------------------------------------------------------------------------------------------------------|
| <b>Interventions</b> | The Creating Learning Environments for Compassionate Care (CLECC): educational programme focused on developing manager and team practices at a group level that create an expansive learning environment, theorised to enhance team capacity to provide compassionate care |
| <b>Outcomes</b>      | Nurses' self-reported empathy was measured using the Jefferson Scale of Empathy (JSE) (Physician/HP version).                                                                                                                                                              |
| <b>Notes</b>         | -                                                                                                                                                                                                                                                                          |

**Risk of bias table**

| <b>Bias</b>                                               | <b>Authors' judgement</b> | <b>Support for judgement</b>                                                                                                                                                                                                                                                                                                                                                                                                                                                                                                                                                                                      |
|-----------------------------------------------------------|---------------------------|-------------------------------------------------------------------------------------------------------------------------------------------------------------------------------------------------------------------------------------------------------------------------------------------------------------------------------------------------------------------------------------------------------------------------------------------------------------------------------------------------------------------------------------------------------------------------------------------------------------------|
| Random sequence generation (selection bias)               | Low risk                  | "Randomisation of clusters was undertaken using the ralloc command in Stata (Release 12, StataCorp) by the team statistician (IM-E) blinded to hospital and ward information other than ward specialty."                                                                                                                                                                                                                                                                                                                                                                                                          |
| Allocation concealment (selection bias)                   | Low risk                  | "Procedures for allocation concealment and blinding proceeded as planned, with the exception of two researcher observers at follow-up reporting that they learnt of ward allocation from ward staff."                                                                                                                                                                                                                                                                                                                                                                                                             |
| Blinding of participants and personnel (performance bias) | High risk                 | "It was not possible to conceal allocation from ward team nursing staff. Patients were not informed of allocation."                                                                                                                                                                                                                                                                                                                                                                                                                                                                                               |
| Blinding of outcome assessment (detection bias)           | High risk                 | Empathy measurement is self-rated questionnaire so unable to blind outcome assessor<br><br>Researchers gathering questionnaire data were aware of ward allocation.                                                                                                                                                                                                                                                                                                                                                                                                                                                |
| Incomplete outcome data (attrition bias)                  | High risk                 | No attrition of wards during the study                                                                                                                                                                                                                                                                                                                                                                                                                                                                                                                                                                            |
| Selective reporting (reporting bias)                      | High risk                 | No data reported on JSE other than: "There was no significant difference between groups (P=0.800)"                                                                                                                                                                                                                                                                                                                                                                                                                                                                                                                |
| Other bias                                                | Unclear risk              | Baseline demographic and baseline measurement difference not fully reported for JSE. Recruitment bias low risk: Six wards in two NHS hospital Trusts in England were enrolled and allocated to intervention (n=4) or control (n=2). The number of clusters was determined by funding availability and the plan to run the study in at least two hospital organisations, and at least two ward specialties. Randomisation of clusters was undertaken using the ralloc command in Stata (Release 12, StataCorp) by the team statistician (IM-E) blinded to hospital and ward information other than ward specialty. |

**Hastings 2018**

|                      |                                                                                                                                                                                                                                                                                                                                                                                                                                                                                                                                                                                                                                                                                                                                                                                                                                                                                                                                            |
|----------------------|--------------------------------------------------------------------------------------------------------------------------------------------------------------------------------------------------------------------------------------------------------------------------------------------------------------------------------------------------------------------------------------------------------------------------------------------------------------------------------------------------------------------------------------------------------------------------------------------------------------------------------------------------------------------------------------------------------------------------------------------------------------------------------------------------------------------------------------------------------------------------------------------------------------------------------------------|
| <b>Methods</b>       | Cluster randomised controlled trial                                                                                                                                                                                                                                                                                                                                                                                                                                                                                                                                                                                                                                                                                                                                                                                                                                                                                                        |
| <b>Participants</b>  | 118 residential care settings for people with intellectual disability (with a total of 236 staff) were randomised to either the intervention or control group.<br>Residential settings were eligible for inclusion if: they were based in a community setting, provided services via publicly funded contracts, supported between one and 10 people with ID, employed staff who provided at least some 24-h support, provided care for at least one person with ID who displayed aggressive CB, could identify one manager/lead staff member and one other support staff member who could attend WCW training together.<br>Staff were eligible for inclusion if: they were either a manager (or lead staff member as defined by the service provider organisation) or a direct support worker whose roles were no more than 50% administrative/management.<br>Staff who worked less than 70% of full-time equivalent were also ineligible. |
| <b>Interventions</b> | WCW (Who's challenging who) training course for support staff in ID context covering communication, frustrations of people with CB (challenging behaviours), experience of                                                                                                                                                                                                                                                                                                                                                                                                                                                                                                                                                                                                                                                                                                                                                                 |

Winter R, Isa E, Roberts N, Norman RI, Howick J 2019

|                 |                                                                                                                                                                                                                                                                        |
|-----------------|------------------------------------------------------------------------------------------------------------------------------------------------------------------------------------------------------------------------------------------------------------------------|
|                 | being physically restrained, medication, feeling excluded and unhelpful attitudes and behaviour or support staff).<br>The intervention was delivered in small group facilitated learning sessions by trained trainers. It was delivered in a one off half day session. |
| <b>Outcomes</b> | The Staff Empathy for people with Challenging Behaviour Questionnaire (SECBQ) was used to measure staff self-reported empathy at baseline and at 6 weeks and 20 weeks post randomisation.                                                                              |
| <b>Notes</b>    | -                                                                                                                                                                                                                                                                      |

*Risk of bias table*

| Bias                                                      | Authors' judgement | Support for judgement                                                                                                                                                                                                                                                                                                                                                  |
|-----------------------------------------------------------|--------------------|------------------------------------------------------------------------------------------------------------------------------------------------------------------------------------------------------------------------------------------------------------------------------------------------------------------------------------------------------------------------|
| Random sequence generation (selection bias)               | Low risk           | "Randomisation occurred at one point in time for each phase, was carried out by a study-independent statistician from the Centre for Trials Research and used a dynamic balancing algorithm specifically designed for cluster randomised trials"                                                                                                                       |
| Allocation concealment (selection bias)                   | Low risk           | The trial statistician remained blind to allocation up until the point of data analysis.                                                                                                                                                                                                                                                                               |
| Blinding of participants and personnel (performance bias) | High risk          | "Settings, and staff members within them, could not be masked to the intervention but were recruited prior to randomisation."                                                                                                                                                                                                                                          |
| Blinding of outcome assessment (detection bias)           | High risk          | Self-reported outcomes to measure empathy                                                                                                                                                                                                                                                                                                                              |
| Incomplete outcome data (attrition bias)                  | High risk          | Intervention group:<br>77% received intervention<br>6 week follow up 44.1%<br>20 week follow up 48.3%                                                                                                                                                                                                                                                                  |
| Selective reporting (reporting bias)                      | Low risk           | Outcomes reported as per methodology                                                                                                                                                                                                                                                                                                                                   |
| Other bias                                                | Low risk           | Recruitment bias low: Randomisation occurred at one point in time for each phase, was carried out by a study-independent statistician from the Centre for Trials Research and used a dynamic balancing algorithm specifically designed for cluster randomised trials<br>No evidence that further residential settings were added to the trial following randomisation. |

**Hattink 2015**

|                      |                                                                                                                                                                                                                                                                                                                                                                                                                                                                                                                                                                                                                                                                                                        |
|----------------------|--------------------------------------------------------------------------------------------------------------------------------------------------------------------------------------------------------------------------------------------------------------------------------------------------------------------------------------------------------------------------------------------------------------------------------------------------------------------------------------------------------------------------------------------------------------------------------------------------------------------------------------------------------------------------------------------------------|
| <b>Methods</b>       | Randomised controlled trial                                                                                                                                                                                                                                                                                                                                                                                                                                                                                                                                                                                                                                                                            |
| <b>Participants</b>  | The countries of origin were UK and the Netherlands.<br>142 care givers (informal or professional) were randomised to the intervention or control group. 24 were professional care givers.<br>Participants who fulfilled the following criteria were recruited for the evaluation study: (1) were sufficiently computer literate to utilize the STAR website and (2) were currently an informal caregiver for someone with dementia living in the community, or a volunteer working with people with dementia with direct contact with community-dwelling people with dementia, or a professional caregiver for people with dementia with direct contact with community-dwelling people with dementia. |
| <b>Interventions</b> | STAR training portal, a Web-based portal consisting of 8 modules, 2 of which had a basic level and 6 additional modules at intermediate and advanced levels about dementia care. In addition, users had access to online peer and expert communities for support and information exchange.<br>Up to 4 months to complete on-line training modules at participants own pace.                                                                                                                                                                                                                                                                                                                            |

Winter R, Isa E, Roberts N, Norman RI, Howick J 2019

|                 |                                                                                                                                                                                                                                   |
|-----------------|-----------------------------------------------------------------------------------------------------------------------------------------------------------------------------------------------------------------------------------|
| <b>Outcomes</b> | The Interpersonal Reactivity Index (IRI) was used to measure empathy pre and post intervention (empathy was measured as a secondary outcome) with changes to knowledge about dementia and attitudes to it being primary outcomes. |
| <b>Notes</b>    | -                                                                                                                                                                                                                                 |

**Risk of bias table**

| <b>Bias</b>                                               | <b>Authors' judgement</b> | <b>Support for judgement</b>                                                                                                                                                                                                                                                                                                                                                                                                                                                     |
|-----------------------------------------------------------|---------------------------|----------------------------------------------------------------------------------------------------------------------------------------------------------------------------------------------------------------------------------------------------------------------------------------------------------------------------------------------------------------------------------------------------------------------------------------------------------------------------------|
| Random sequence generation (selection bias)               | Low risk                  | "Randomization software was used to classify participants into either the experimental or control group."                                                                                                                                                                                                                                                                                                                                                                        |
| Allocation concealment (selection bias)                   | Low risk                  | "Randomization software was used to classify participants into either the experimental or control group"                                                                                                                                                                                                                                                                                                                                                                         |
| Blinding of participants and personnel (performance bias) | High risk                 | "Participants in the experimental group received a link to the STAR registration"<br><br>"People in the control group were informed that they were assigned to the group that could follow the course free of charge after post-test measurements 4 months later."                                                                                                                                                                                                               |
| Blinding of outcome assessment (detection bias)           | High risk                 | Self-rated instrument used to measure empathy                                                                                                                                                                                                                                                                                                                                                                                                                                    |
| Incomplete outcome data (attrition bias)                  | High risk                 | "During the pilot, 59 participants dropped out. The total response at post-test was 61%. Reasons for dropouts in the Netherlands (n=29) were no time (n=4) or unknown (n=25; no response to repeated emails of researchers to remind them of filling in the questionnaires). Reasons for dropouts in the United Kingdom (n=30) were no time (n=1), no computer at home (n=1), or unknown (n=28; no response to repeated requests by researchers to fill in the questionnaires)." |
| Selective reporting (reporting bias)                      | Low risk                  | Outcomes reported as per methodology                                                                                                                                                                                                                                                                                                                                                                                                                                             |
| Other bias                                                | Low risk                  | No other bias detected                                                                                                                                                                                                                                                                                                                                                                                                                                                           |

**Larti 2018**

|                      |                                                                                                                                                                                                                                                                                                                                                                                                                                                                                                                                                                                                             |
|----------------------|-------------------------------------------------------------------------------------------------------------------------------------------------------------------------------------------------------------------------------------------------------------------------------------------------------------------------------------------------------------------------------------------------------------------------------------------------------------------------------------------------------------------------------------------------------------------------------------------------------------|
| <b>Methods</b>       | Comparative study with random allocation to control and intervention groups.                                                                                                                                                                                                                                                                                                                                                                                                                                                                                                                                |
| <b>Participants</b>  | The country of origin was Iran<br>82 operating room nursing students were randomised to either the intervention or control group.<br>Inclusion criteria: second-semester or higher students who had entered the stage of clinical practice, had experience with communicating with patients, had not been diagnosed with any psychological conditions, and had no history of participation in communication or patient empathy workshops<br>The exclusion criteria included incomplete responses to questionnaires, absence at any of the training sessions, and withdrawal from continuation of the study. |
| <b>Interventions</b> | Training programme for empathetic communication with patients in the operating room, mainly during the perioperative phase, using role-playing technique. The training was delivered face-to-face by the researchers with assistance from psychologists specialising in running empathy workshops. The duration of training was 12 hours delivered in 3 x 4 hour sessions with weekly sessions over 3 weeks.                                                                                                                                                                                                |
| <b>Outcomes</b>      | The purpose of this study was to investigate the effects of a role-playing training program for empathetic communication with patients on the empathy scores of operating room nursing students. The JSE-HPS was used to measure self-rated empathy pre and one month post intervention.                                                                                                                                                                                                                                                                                                                    |
| <b>Notes</b>         | -                                                                                                                                                                                                                                                                                                                                                                                                                                                                                                                                                                                                           |



Winter R, Isa E, Roberts N, Norman RI, Howick J 2019

*Risk of bias table*

| Bias                                                      | Authors' judgement | Support for judgement                                                                                                                                                                                                                                                                                 |
|-----------------------------------------------------------|--------------------|-------------------------------------------------------------------------------------------------------------------------------------------------------------------------------------------------------------------------------------------------------------------------------------------------------|
| Random sequence generation (selection bias)               | Low risk           | "A number was then randomly assigned to each of the students, and the numbers were poured into a bowl. The first paper drawn out of the bowl was for the experimental group, the second paper was for the control group, and this procedure was continued to select students from all years of study" |
| Allocation concealment (selection bias)                   | Low risk           | "A number was then randomly assigned to each of the students, and the numbers were poured into a bowl. The first paper drawn out of the bowl was for the experimental group, the second paper was for the control group, and this procedure was continued to select students from all years of study" |
| Blinding of participants and personnel (performance bias) | High risk          | "The objectives of the training program were then explained"                                                                                                                                                                                                                                          |
| Blinding of outcome assessment (detection bias)           | High risk          | Self-assessment so no blinding of outcome assessor                                                                                                                                                                                                                                                    |
| Incomplete outcome data (attrition bias)                  | Low risk           | Low attrition rate (6%)                                                                                                                                                                                                                                                                               |
| Selective reporting (reporting bias)                      | Low risk           | No other bias detected                                                                                                                                                                                                                                                                                |
| Other bias                                                | Unclear risk       |                                                                                                                                                                                                                                                                                                       |

**Lobchuck 2018**

|                      |                                                                                                                                                                                                                                                                                                                                                                                                                                                                                                                                        |
|----------------------|----------------------------------------------------------------------------------------------------------------------------------------------------------------------------------------------------------------------------------------------------------------------------------------------------------------------------------------------------------------------------------------------------------------------------------------------------------------------------------------------------------------------------------------|
| <b>Methods</b>       | Two centre randomised controlled pilot study                                                                                                                                                                                                                                                                                                                                                                                                                                                                                           |
| <b>Participants</b>  | The country of origin was Canada<br>25 nursing students were allocated to the intervention group and 19 to the control group. Students at: (a) the end of the second year or in the third year of a three-year accelerated baccalaureate program at the college or (b) the end of the second year or in the third or fourth year of a four-year baccalaureate program at the university were included. No exclusion criteria listed.                                                                                                   |
| <b>Interventions</b> | Heart Health Whispering intervention was delivered as a novel person-centered approach for counselling and health promotion. The training programme on perspective taking involved 4 phases. Phase 1 – individual teaching on perspective taking followed by 2 week period and instructions to practice skills. Phase 2 10 minute videoed conversation with actor. Phase 3, researcher and actor watch video and 'video-tag' thoughts and feelings actor remembered having experienced, shared, displayed etc. Phase 4 exit interviews |
| <b>Outcomes</b>      | Empathy post intervention was assessed using the CARE scale completed by observer An adapted version of the CARE scale was also completed by the participant to capture their inference of the actors response to his or her clinical empathy.                                                                                                                                                                                                                                                                                         |
| <b>Notes</b>         | -                                                                                                                                                                                                                                                                                                                                                                                                                                                                                                                                      |

*Risk of bias table*

| Bias                                                      | Authors' judgement | Support for judgement                                                                                                                |
|-----------------------------------------------------------|--------------------|--------------------------------------------------------------------------------------------------------------------------------------|
| Random sequence generation (selection bias)               | Low risk           | "The Research Assistant (RA) conducted a computerized randomization process to assign students to Group I (n=24) or Group PI (n=18)" |
| Allocation concealment (selection bias)                   | Unclear risk       | Not reported                                                                                                                         |
| Blinding of participants and personnel (performance bias) | High risk          | "Due to practical reasons, students, the interventionist (JL), and interviewers (ML and LH) were not blinded"                        |

## Winter R, Isa E, Roberts N, Norman RI, Howick J 2019

|                                                 |              |                                                                                                                            |
|-------------------------------------------------|--------------|----------------------------------------------------------------------------------------------------------------------------|
| Blinding of outcome assessment (detection bias) | Unclear risk | Mixed<br>High – self reported measure of empathy (JSE)<br>Low – observer reported - actor was blinded to group assignment. |
| Incomplete outcome data (attrition bias)        | Low risk     | Low attrition rate 5%                                                                                                      |
| Selective reporting (reporting bias)            | Unclear risk | Outcomes reported as per methodology                                                                                       |
| Other bias                                      | Unclear risk | Baseline demographic differences not reported                                                                              |

## Lor 2014

|                      |                                                                                                                                                                                                                                                                                                                                                                                                                                                 |
|----------------------|-------------------------------------------------------------------------------------------------------------------------------------------------------------------------------------------------------------------------------------------------------------------------------------------------------------------------------------------------------------------------------------------------------------------------------------------------|
| <b>Methods</b>       | Randomised controlled trial                                                                                                                                                                                                                                                                                                                                                                                                                     |
| <b>Participants</b>  | The country of origin was USA<br>40 student pharmacists were randomised to either the intervention or the control group. Students with pre-existing medical conditions were asked not to participate, and students with any self-reported medical conditions were automatically excluded.                                                                                                                                                       |
| <b>Interventions</b> | A 3 day simulation with each day including a designed activity with loss of the dominant hand usage, vision and speech. Simulations were followed by small group discussions regarding the daily activity, which covered its purpose, their feelings about the activity, items they learned, key take-away points, and how the items would affect their practice as future health care providers. This was followed by a large group discussion |
| <b>Outcomes</b>      | The purpose of this study was to determine the immediate and sustained impact of a single, 3-day empathy intervention on empathy levels among students. The JSE-HPS was used to measure self-reported empathy at baseline, 7 days post-intervention and 90 days post-intervention.                                                                                                                                                              |
| <b>Notes</b>         | -                                                                                                                                                                                                                                                                                                                                                                                                                                               |

## Risk of bias table

| Bias                                                      | Authors' judgement | Support for judgement                                                                                                                                                                                                                                           |
|-----------------------------------------------------------|--------------------|-----------------------------------------------------------------------------------------------------------------------------------------------------------------------------------------------------------------------------------------------------------------|
| Random sequence generation (selection bias)               | Unclear risk       | "Forty student pharmacists who volunteered and provided informed consent were then randomly assigned to either the intervention or control group"<br><br>No information provided on random sequence generation                                                  |
| Allocation concealment (selection bias)                   | Unclear risk       | "Subjects were randomized to an intervention group (n520) or control group (n520) and completed the JSE-HPS at baseline, 7 days postintervention, and 90 days postintervention."<br><br>No information provided on allocation of students                       |
| Blinding of participants and personnel (performance bias) | High risk          | "The purpose of this study was to determine the immediate and sustained impact of a single, 3-day empathy intervention on empathy levels among students and to address the lack of a control group by using a randomized, non-blinded, quasi-controlled design" |
| Blinding of outcome assessment (detection bias)           | High risk          | "The Jefferson Scale of Empathy-Health Profession Students version (JSE-HPS) was administered to the intervention and control groups at baseline, 7 days following the intervention (as post-test 1), and 90 days following the intervention (as post-test 2)." |
| Incomplete outcome data (attrition bias)                  | Low risk           | No attrition from randomisation to reporting                                                                                                                                                                                                                    |
| Selective reporting (reporting bias)                      | Low risk           | Outcomes reported as per methodology                                                                                                                                                                                                                            |
| Other bias                                                | Low risk           | No other bias detected                                                                                                                                                                                                                                          |

Winter R, Isa E, Roberts N, Norman RI, Howick J 2019

LoSasso 2017

|                      |                                                                                                                                                                                                                                                                                                                           |
|----------------------|---------------------------------------------------------------------------------------------------------------------------------------------------------------------------------------------------------------------------------------------------------------------------------------------------------------------------|
| <b>Methods</b>       | Randomised controlled trial                                                                                                                                                                                                                                                                                               |
| <b>Participants</b>  | The country of origin was USA.<br>70 medical students were randomised to either the intervention or control groups. Third-year students were eligible to participate in the study while on their regularly scheduled six-week paediatric clerkship if their outpatient assignment was at a site using the Epic EMR system |
| <b>Interventions</b> | Training session on EMR (electronic medical records) specific communication skills, including discussion of EMR use, the SALTED (set-up, ask, listen, type, exceptions, documentation) mnemonic and technique and role-play.                                                                                              |
| <b>Outcomes</b>      | Empathy was measured pre and post intervention using the self-rated JSE questionnaire. In addition an observer rating of empathy was taken using the JSPPPE (Jefferson Scale of Patient Perception of Physician Empathy).                                                                                                 |
| <b>Notes</b>         | No funding source reported.                                                                                                                                                                                                                                                                                               |

*Risk of bias table*

| Bias                                                      | Authors' judgement | Support for judgement                                                                                                                                                                                                                     |
|-----------------------------------------------------------|--------------------|-------------------------------------------------------------------------------------------------------------------------------------------------------------------------------------------------------------------------------------------|
| Random sequence generation (selection bias)               | Unclear risk       | "Participants in each six-week clerkship block were randomly assigned to the intervention group (n = 38) or to the control group (n = 32)."<br><br>Not stated how randomisation occurred                                                  |
| Allocation concealment (selection bias)                   | Unclear risk       | Details on allocation process not given                                                                                                                                                                                                   |
| Blinding of participants and personnel (performance bias) | High risk          | "In consenting for the study, students in both groups were made aware that the study examined how the training may improve empathy, which could have led to some bias."                                                                   |
| Blinding of outcome assessment (detection bias)           | Unclear risk       | The SP and faculty raters' were blinded to whether students were in the intervention or control group – and completed the observer-rated scale JSPPPE (low risk)<br><br>Self-reported scale JSE outcome assessors not blinded (high risk) |
| Incomplete outcome data (attrition bias)                  | Low risk           | No attrition from randomisation to analysis                                                                                                                                                                                               |
| Selective reporting (reporting bias)                      | Low risk           | Outcomes reported as per methodology                                                                                                                                                                                                      |
| Other bias                                                | Low risk           | No other bias detected                                                                                                                                                                                                                    |

Mueller 2018

|                      |                                                                                                                                                                                                                                                                                                                                                                 |
|----------------------|-----------------------------------------------------------------------------------------------------------------------------------------------------------------------------------------------------------------------------------------------------------------------------------------------------------------------------------------------------------------|
| <b>Methods</b>       | Randomised controlled trial.                                                                                                                                                                                                                                                                                                                                    |
| <b>Participants</b>  | The country of origin was USA.<br>19 physical therapy students were randomised to the intervention group and 18 to the control group (which was a 'delayed' intervention group).<br>All students entering the third year were approached. No exclusion criteria listed.                                                                                         |
| <b>Interventions</b> | On-line Called to Care curriculum used to improve patient outcomes through the development of optimal physical therapist behaviours. (employs film clips, quidded questions, research articles and other readings to promote the clinical application of educational concepts. Participants post and respond via a discussion board for each of the 11 modules. |

Winter R, Isa E, Roberts N, Norman RI, Howick J 2019

|                 |                                                                               |
|-----------------|-------------------------------------------------------------------------------|
| <b>Outcomes</b> | The JSE-HP was used to measure a change in empathy pre and post intervention. |
| <b>Notes</b>    |                                                                               |

*Risk of bias table*

| Bias                                                      | Authors' judgement | Support for judgement                                                                                                                                                                                                                                               |
|-----------------------------------------------------------|--------------------|---------------------------------------------------------------------------------------------------------------------------------------------------------------------------------------------------------------------------------------------------------------------|
| Random sequence generation (selection bias)               | Low risk           | "Participants were randomly assigned (via a blinded shuffle of cards) to an immediate intervention group or a delayed intervention group."                                                                                                                          |
| Allocation concealment (selection bias)                   | Low risk           | "Participants were randomly assigned (via a blinded shuffle of cards) to an immediate intervention group or a delayed intervention group. The deck included only the numbered cards (to ensure an event 50/50 split) and group assignment based on events or odds." |
| Blinding of participants and personnel (performance bias) | High risk          | An orientation to the Called to Care curriculum was provided to all participants at the end of the spring 2015 semester. The participants were informed of their designation into the immediate or delayed intervention group.                                      |
| Blinding of outcome assessment (detection bias)           | High risk          | Self-reported scale                                                                                                                                                                                                                                                 |
| Incomplete outcome data (attrition bias)                  | Low risk           | Of the 37 participants 1 withdraw due to pregnancy-related delay in her internship (2.7%)                                                                                                                                                                           |
| Selective reporting (reporting bias)                      | Low risk           | Outcomes reported as per methodology                                                                                                                                                                                                                                |
| Other bias                                                | High risk          | No other bias detected                                                                                                                                                                                                                                              |

## Reiss 2012

|                      |                                                                                                                                                                                                                                                                                                                                                                                                                                                                                                                                                                                                 |
|----------------------|-------------------------------------------------------------------------------------------------------------------------------------------------------------------------------------------------------------------------------------------------------------------------------------------------------------------------------------------------------------------------------------------------------------------------------------------------------------------------------------------------------------------------------------------------------------------------------------------------|
| <b>Methods</b>       | Randomised controlled trial                                                                                                                                                                                                                                                                                                                                                                                                                                                                                                                                                                     |
| <b>Participants</b>  | The country of origin was USA.<br>54 residents and fellows were randomised to the intervention group and 45 to the control group.<br>Residents and fellows were eligible if they (1) were currently in training, (2) were available to attend all three training modules, and (3) had clinical interactions with adult outpatients or inpatients able to complete physician rating surveys.<br>Trainees on clinical rotations outside MEEI or MGH were excluded.<br>Trainees on night float, paediatrics, ICU or research rotations were excluded unless they had a clinic with adult patients. |
| <b>Interventions</b> | Empathy and relational skills training protocol developed by first author and previously tested in a pilot study. Aims of training (1) scientific foundation of empathy, (2) increase awareness of physiology of emotions, (3) improve skills in decoding facial expressions of emotion, (4) teach empathic responses.<br>Training was delivered by a trained physician in both the inpatient and outpatient setting. The duration of intervention was 4 hours and was delivered in 60 minute modules spaced over 4 weeks.                                                                      |
| <b>Outcomes</b>      | Change in empathy was assessed by patients using the CARE measure as the primary outcome. As secondary outcomes the following was measured: Physician skill at decoding facial expression (The Ekman Facial Decoding Test). Self-rated physician attitude about empathy (JSPSE, validated scale). Self-rated general empathic responsiveness in personal life (The Balanced Emotional Empathy Scale, BEES)                                                                                                                                                                                      |
| <b>Notes</b>         | -                                                                                                                                                                                                                                                                                                                                                                                                                                                                                                                                                                                               |

*Risk of bias table*

| Bias | Authors' judgement | Support for judgement |
|------|--------------------|-----------------------|
|------|--------------------|-----------------------|

Winter R, Isa E, Roberts N, Norman RI, Howick J 2019

|                                                           |              |                                                                                                                                                                                                                                                                                                                                                                   |
|-----------------------------------------------------------|--------------|-------------------------------------------------------------------------------------------------------------------------------------------------------------------------------------------------------------------------------------------------------------------------------------------------------------------------------------------------------------------|
| Random sequence generation (selection bias)               | Low risk     | "Group assignment was determined by a computer-generated random number sequence"                                                                                                                                                                                                                                                                                  |
| Allocation concealment (selection bias)                   | Low risk     | "Participating physicians were randomly assigned in a 1:1 allocation ratio to either the training intervention or to standard residency or fellowship training"                                                                                                                                                                                                   |
| Blinding of participants and personnel (performance bias) | High risk    | "Participating physicians were randomly assigned in a 1:1 allocation ratio to either the training intervention or to standard residency or fellowship training."<br><br>"The training was comprised of three 60-minute modules spaced over 4 weeks"                                                                                                               |
| Blinding of outcome assessment (detection bias)           | Unclear risk | "Patients were blind to physician randomization, and physicians were blinded to which patients completed the surveys"<br><br>"The primary outcome measure was change in empathetic and relational skills as assessed by patients blinded to physician randomization"<br><br>Secondary outcomes – self rated scales of empathy so unable to blind outcome assessor |
| Incomplete outcome data (attrition bias)                  | Low risk     | Overall attrition rate 7.5% (4 participants lost in control group, 1 participant lost in intervention group).                                                                                                                                                                                                                                                     |
| Selective reporting (reporting bias)                      | Low risk     | Primary and secondary outcomes reported as stated in methods.                                                                                                                                                                                                                                                                                                     |
| Other bias                                                | Low risk     | No other bias detected                                                                                                                                                                                                                                                                                                                                            |

Shapiro 1998

|                      |                                                                                                                                                                                                                                                                                                                                                                                                                                                                                                                                                                                                        |
|----------------------|--------------------------------------------------------------------------------------------------------------------------------------------------------------------------------------------------------------------------------------------------------------------------------------------------------------------------------------------------------------------------------------------------------------------------------------------------------------------------------------------------------------------------------------------------------------------------------------------------------|
| <b>Methods</b>       | Matched randomised experiment with wait-list controls.                                                                                                                                                                                                                                                                                                                                                                                                                                                                                                                                                 |
| <b>Participants</b>  | 78 premedical and medical students were randomised to either the intervention or control groups.<br>Inclusion criteria: first- and second-year medical students, the premedical honours society, and the Fostering and Achieving Cultural Equity and Sensitivity (FACES) premedical student group.<br>Only those students willing to be randomly assigned to either the intervention or control group were included in the study.                                                                                                                                                                      |
| <b>Interventions</b> | Elective module in Stress Reduction and Relaxation. The core of the program focused on training the students in mindfulness. Participants received training in: "Sitting Meditation", "Body Scan" and "Hatha Yoga". Emphasis on mindful breathing, "lovingkindness" and "forgiveness". In addition, students participated in experiential exercises designed to cultivate mindful listening skills and empathy.<br>The training was delivered via a mixture of didactic teaching and small group sessions. The duration was approximately 18 hours delivered in 2.5 hour weekly sessions over 8 weeks. |
| <b>Outcomes</b>      | Empathy was measured using an adapted version (half of the original version of 84 items) of The Empathy Construct Rating Scale (ECRS).                                                                                                                                                                                                                                                                                                                                                                                                                                                                 |
| <b>Notes</b>         | No funding source reported                                                                                                                                                                                                                                                                                                                                                                                                                                                                                                                                                                             |

Risk of bias table

| Bias                                        | Authors' judgement | Support for judgement                                                                                                                                                                                    |
|---------------------------------------------|--------------------|----------------------------------------------------------------------------------------------------------------------------------------------------------------------------------------------------------|
| Random sequence generation (selection bias) | Unclear risk       | "The design was a matched randomized experiment in which participants were assigned to a 7-week mindfulness-based intervention or a wait-list control group."<br>Random sequence generation not reported |

## Winter R, Isa E, Roberts N, Norman RI, Howick J 2019

|                                                           |              |                                                                                                                                                                                                                                                                                                                                 |
|-----------------------------------------------------------|--------------|---------------------------------------------------------------------------------------------------------------------------------------------------------------------------------------------------------------------------------------------------------------------------------------------------------------------------------|
| Allocation concealment (selection bias)                   | Unclear risk | Details of allocation concealment not stated                                                                                                                                                                                                                                                                                    |
| Blinding of participants and personnel (performance bias) | High risk    | "The design was a matched randomized experiment in which participants were assigned to a 7-week mindfulness-based intervention or a wait-list control group"                                                                                                                                                                    |
| Blinding of outcome assessment (detection bias)           | Unclear risk | "all assessment measures were self-report psychological questionnaires which are intrinsically limited and open to response bias."                                                                                                                                                                                              |
| Incomplete outcome data (attrition bias)                  | Low risk     | "One student did not complete the intervention due to severe medical problems for which she was hospitalized. Four of the participants in the control group did not complete the post-measures. The final count of participants was 73, consisting of 32 males and 41 females, 35 premedical students and 38 medical students." |
| Selective reporting (reporting bias)                      | High risk    | "Outcomes reported as a cohort in general."                                                                                                                                                                                                                                                                                     |
| Other bias                                                | Low risk     | No other bias detected                                                                                                                                                                                                                                                                                                          |

## Sripada 2010

|                      |                                                                                                                                                                                                                                                                                                                                                                                                                                                                                                                                                                                                                                                                                                                                                                                                                                                                                                                                                         |
|----------------------|---------------------------------------------------------------------------------------------------------------------------------------------------------------------------------------------------------------------------------------------------------------------------------------------------------------------------------------------------------------------------------------------------------------------------------------------------------------------------------------------------------------------------------------------------------------------------------------------------------------------------------------------------------------------------------------------------------------------------------------------------------------------------------------------------------------------------------------------------------------------------------------------------------------------------------------------------------|
| <b>Methods</b>       | Pilot randomised controlled trial                                                                                                                                                                                                                                                                                                                                                                                                                                                                                                                                                                                                                                                                                                                                                                                                                                                                                                                       |
| <b>Participants</b>  | The country of origin was USA.<br>12 psychiatry residents were randomised to either the intervention or control group. All second- through fourth-year psychiatry residents treating out-patients at the University of Illinois College of Medicine during the academic years 2002–2005 were eligible to participate in this study.<br>Patients were eligible if they were between the ages of 18 and 65, were in treatment for an Axis I psychiatric disorder, had no intellectual disability, and were not suicidal or psychotic.                                                                                                                                                                                                                                                                                                                                                                                                                     |
| <b>Interventions</b> | A feedback intervention designed to increase therapist empathic understanding and improve patient outcomes in psychotherapy was delivered.<br>The feedback intervention condition involved completing the empathy measure along with other measures, and engaging in the feedback intervention which involved: At the end of each therapy session, patients and therapists recorded their views of the patient's GAF and predicted the GAF ratings of the other. In the intervention condition, at the beginning of the next session, therapists and patients exchanged ratings from the preceding session, providing an opportunity to discuss their respective views.<br>The average number of sessions completed by each therapist–patient pair was 14.1<br>The average duration of patient participation in the study was 13.75 (±7.0) sessions or 183.87 (± 111.1) days. The average duration of therapist participation was 195.8 (± 117.4) days. |
| <b>Outcomes</b>      | The Barrett-Lennard Relationship Inventory - 6-item scale designed to assess patients' ratings of therapist empathy as well as therapists' self-ratings of empathy.                                                                                                                                                                                                                                                                                                                                                                                                                                                                                                                                                                                                                                                                                                                                                                                     |
| <b>Notes</b>         | -                                                                                                                                                                                                                                                                                                                                                                                                                                                                                                                                                                                                                                                                                                                                                                                                                                                                                                                                                       |

## Risk of bias table

| Bias                                                      | Authors' judgement | Support for judgement                                                                                                                                                                                       |
|-----------------------------------------------------------|--------------------|-------------------------------------------------------------------------------------------------------------------------------------------------------------------------------------------------------------|
| Random sequence generation (selection bias)               | Unclear risk       | "Patient-therapist pairs were randomly assigned by the first author to the intervention or control group by flipping a coin." However how therapists were assigned to intervention or control not reported. |
| Allocation concealment (selection bias)                   | Unclear risk       | Allocation to intervention/control not described                                                                                                                                                            |
| Blinding of participants and personnel (performance bias) | High risk          | "Patients were blind to intervention condition, but therapists were not, as they administered the intervention".                                                                                            |

Winter R, Isa E, Roberts N, Norman RI, Howick J 2019

|                                                 |              |                                                                                                                                                                                                                                                            |
|-------------------------------------------------|--------------|------------------------------------------------------------------------------------------------------------------------------------------------------------------------------------------------------------------------------------------------------------|
| Blinding of outcome assessment (detection bias) | Unclear risk | "A more methodological limitation of this study is the potential for contamination that existed because a single therapist treated five patients, three of whom were assigned to control, and two of whom were assigned to intervention."                  |
| Incomplete outcome data (attrition bias)        | Low risk     | Methodology states: "Additionally, at the end of the 1st, 5th, 10th, 15th, and 20th sessions, patient and therapist subjects in both groups completed their respective forms of the BLRI (Barrett-Lennard, 1976). Only patient scores reported in results" |
| Selective reporting (reporting bias)            | High risk    | Data not explicitly reported for each group                                                                                                                                                                                                                |
| Other bias                                      | Unclear risk | difference in baseline demographics of therapists and patients not reported                                                                                                                                                                                |

Sterkenburg 2018

|                      |                                                                                                                                                                                                                                                                                                                                                                                   |
|----------------------|-----------------------------------------------------------------------------------------------------------------------------------------------------------------------------------------------------------------------------------------------------------------------------------------------------------------------------------------------------------------------------------|
| <b>Methods</b>       | Parallel randomised controlled trial                                                                                                                                                                                                                                                                                                                                              |
| <b>Participants</b>  | The country of origin was the Netherlands.<br>111 care workers were randomised to the intervention group and 113 to the control group.<br>Inclusion: Care workers working with people with disabilities                                                                                                                                                                           |
| <b>Interventions</b> | Playing a computer-based serious game "The World of EMPA", aimed at enhancing empathy towards people with disabilities. The game illustrates characters with several types of disability, with six levels in which players have to respond to multiple-choice questions.<br>The intervention was delivered online and took 20 minutes to complete. It was a one-off intervention. |
| <b>Outcomes</b>      | The Empathy Quotient (EQ) short version self-rating questionnaire was administered to assess changes in empathy at baseline and immediately following the intervention.                                                                                                                                                                                                           |
| <b>Notes</b>         | Funding source not stated.                                                                                                                                                                                                                                                                                                                                                        |

Risk of bias table

| Bias                                                      | Authors' judgement | Support for judgement                                                                                                                                                                                                     |
|-----------------------------------------------------------|--------------------|---------------------------------------------------------------------------------------------------------------------------------------------------------------------------------------------------------------------------|
| Random sequence generation (selection bias)               | Low risk           | "Upon completion of the pre-test phase, participants were automatically randomized via a computerized random assignment to one of the two conditions, based on the Mersenne Twister pseudorandom number generator (PRNG)" |
| Allocation concealment (selection bias)                   | Low risk           | "The automatic computer-based randomization was implemented in the programming script of the experiment, resulting in the concealed allocation of the participants into one of the two intervention arms"                 |
| Blinding of participants and personnel (performance bias) | Low risk           | "The participants were also unaware whether the condition they were allocated to was the experimental or control condition"                                                                                               |
| Blinding of outcome assessment (detection bias)           | Low risk           | "The researcher was blind to condition once participants started the computer program".                                                                                                                                   |
| Incomplete outcome data (attrition bias)                  | Low risk           | a total of 224 care workers working with people with disabilities were recruited, and 223 completed the study                                                                                                             |
| Selective reporting (reporting bias)                      | Low risk           | Outcomes reported as per methodology                                                                                                                                                                                      |
| Other bias                                                | Low risk           | No other bias detected                                                                                                                                                                                                    |

Tulsky 2011

|                     |                                      |
|---------------------|--------------------------------------|
| <b>Methods</b>      | Parallel randomised controlled trial |
| <b>Participants</b> | The country of origin was USA.       |

## Winter R, Isa E, Roberts N, Norman RI, Howick J 2019

|                      |                                                                                                                                                                                                                                                                                                                                                          |
|----------------------|----------------------------------------------------------------------------------------------------------------------------------------------------------------------------------------------------------------------------------------------------------------------------------------------------------------------------------------------------------|
|                      | 24 medical, gynaecological and radiation oncologists were randomised to the intervention group and 24 to the control group.<br>Inclusion and exclusion criteria were not stated.                                                                                                                                                                         |
| <b>Interventions</b> | A communication lecture (1 hour) was delivered to all intervention and control students. An interactive CD-ROM about responding to patients' negative emotions was then given to intervention participants. The CD-ROM included tailored feedback on the oncologists own recorded conversations.<br>Participants had up to one month to view the CD-ROM. |
| <b>Outcomes</b>      | Empathic statements - Post-intervention audio recordings were used to identify the number of empathic statements and responses to patients' expressions of negative emotion.<br>Perceived empathy - 10 Likert scale items was used to assess perceived oncologist empathy (as assessed by patient)                                                       |
| <b>Notes</b>         | -                                                                                                                                                                                                                                                                                                                                                        |

**Risk of bias table**

| <b>Bias</b>                                               | <b>Authors' judgement</b> | <b>Support for judgement</b>                                                                                                                                                                                                                                                                                               |
|-----------------------------------------------------------|---------------------------|----------------------------------------------------------------------------------------------------------------------------------------------------------------------------------------------------------------------------------------------------------------------------------------------------------------------------|
| Random sequence generation (selection bias)               | Low risk                  | "The oncologists were then randomly assigned by using the minimization method"                                                                                                                                                                                                                                             |
| Allocation concealment (selection bias)                   | Low risk                  | "The oncologists were stratified by balanced randomization in a 1:1 ratio by site (Durham or Pittsburgh), sex (men or women), and specialty (medical oncology, solid and liquid tumours; medical oncology, solid tumours only; malignant haematology, liquid tumours only; gynaecologic oncology; or radiation oncology)." |
| Blinding of participants and personnel (performance bias) | High risk                 | "All of the oncologists viewed a 1-hour lecture on communication skills delivered by one of the investigators. In addition, oncologists in the intervention group received a CD-ROM training program on communication skills that was tailored with exemplars from their own audio-recorded clinic visits."                |
| Blinding of outcome assessment (detection bias)           | Low risk                  | "Two independent, blinded coders were trained over 6 weeks"                                                                                                                                                                                                                                                                |
| Incomplete outcome data (attrition bias)                  | Low risk                  | No attrition from randomisation to analysis                                                                                                                                                                                                                                                                                |
| Selective reporting (reporting bias)                      | Low risk                  | Outcomes reported as per methodology                                                                                                                                                                                                                                                                                       |
| Other bias                                                | Low risk                  | No other bias detected                                                                                                                                                                                                                                                                                                     |

**Vaghee 2018**

|                      |                                                                                                                                                                                                                                                                                                                                                                                                                                                                                                                                                                                                                                                                                                             |
|----------------------|-------------------------------------------------------------------------------------------------------------------------------------------------------------------------------------------------------------------------------------------------------------------------------------------------------------------------------------------------------------------------------------------------------------------------------------------------------------------------------------------------------------------------------------------------------------------------------------------------------------------------------------------------------------------------------------------------------------|
| <b>Methods</b>       | Cluster randomised controlled trial                                                                                                                                                                                                                                                                                                                                                                                                                                                                                                                                                                                                                                                                         |
| <b>Participants</b>  | The country of origin was Iran.<br>Nursing faculties training mental health clerkship in Ibne-Sina psychiatric hospital were invited to attend in the study, and accordingly, 12 faculties accepted the invitation, and 4 faculties were randomly selected.<br>127 nursing students were randomised to one of three groups: two intervention groups or a control group.<br>Inclusion criteria were no work experience in psychiatric wards, no psychological disorders, and no mental illness in their first and second degree relatives. Exclusion criteria were reluctance to continue the study, absence of the post-test, and being absent or lack of participation in 1 or more intervention sessions. |
| <b>Interventions</b> | The two intervention groups were:<br>Contact based education: In contact-based education, 3 patients with improved disorders who were working daily for 4 hours as a connector between different wards of the hospital were selected. They had schizophrenia, bipolar type I, and major depression. The patients                                                                                                                                                                                                                                                                                                                                                                                            |



Winter R, Isa E, Roberts N, Norman RI, Howick J 2019

|                 |                                                                                                                                                                                                                                                                                                                 |
|-----------------|-----------------------------------------------------------------------------------------------------------------------------------------------------------------------------------------------------------------------------------------------------------------------------------------------------------------|
|                 | were asked to talk about their experiences and personal life with students<br>Acceptance and commitment education: According to Steven Hayse protocol (1986), ACT with the content of mental illnesses stigma was held as a workshop by one master of clinical psychology and 2 masters of psychiatric nursing, |
| <b>Outcomes</b> | The study aimed at comparing the effects of contact-based education and commitment and acceptance-based training on empathy toward mental illnesses among nursing students. The JSE was used as a self-rating measure of empathy pre and post intervention.                                                     |
| <b>Notes</b>    | -                                                                                                                                                                                                                                                                                                               |

*Risk of bias table*

| Bias                                                      | Authors' judgement | Support for judgement                                                                                                                                                                                                                                                                                                           |
|-----------------------------------------------------------|--------------------|---------------------------------------------------------------------------------------------------------------------------------------------------------------------------------------------------------------------------------------------------------------------------------------------------------------------------------|
| Random sequence generation (selection bias)               | Unclear risk       | "Two groups of male and female students were randomly selected (according to clerkship division group) from each university by quota sampling based on gender distribution. Finally, each group was separately divided into 3 groups of contact-based education, ACT, and control."<br>No details on random sequence generation |
| Allocation concealment (selection bias)                   | Unclear risk       | No details on allocation concealment reported                                                                                                                                                                                                                                                                                   |
| Blinding of participants and personnel (performance bias) | High risk          | "The patients were asked to talk about their experiences and personal life with students"                                                                                                                                                                                                                                       |
| Blinding of outcome assessment (detection bias)           | High risk          | Self-reported outcome measures                                                                                                                                                                                                                                                                                                  |
| Incomplete outcome data (attrition bias)                  | Low risk           | Low attrition rate (12.5%)                                                                                                                                                                                                                                                                                                      |
| Selective reporting (reporting bias)                      | High risk          | Outcomes are not clearly stated in methodology                                                                                                                                                                                                                                                                                  |
| Other bias                                                | Unclear risk       | Recruitment bias: Random cluster and quota sampling methods were used. Nursing faculties training mental health clerkship in Ibne-Sina psychiatric hospital were invited to attend in the study, and accordingly, 12 faculties accepted the invitation, and 4 faculties were randomly selected.                                 |

**Wolf 1987**

|                      |                                                                                                                                                                                                                                                                                                                                                                                                                                                                                                                                                          |
|----------------------|----------------------------------------------------------------------------------------------------------------------------------------------------------------------------------------------------------------------------------------------------------------------------------------------------------------------------------------------------------------------------------------------------------------------------------------------------------------------------------------------------------------------------------------------------------|
| <b>Methods</b>       | Randomised controlled trial                                                                                                                                                                                                                                                                                                                                                                                                                                                                                                                              |
| <b>Participants</b>  | The county of origin was Canada<br>65 medical students were randomised to the intervention group and 69 to the control group.<br>Part of course was conducted in community nursing homes, so not all students could be scheduled to participate in it at the same time. Therefore, some of the students participated in the main part of the study. The remaining (excluded) students participated in the course after the study was completed.                                                                                                          |
| <b>Interventions</b> | Programme in medical interviewing and history taking that integrates humanistic principles and medical content. The course is designed to use community resources and maximise efficient use of faculty members' time. Consists of set of large group lectures and then small group teaching sessions which included discussing strategies for responding empathically to patients.<br>The teaching was delivered in small group sessions by social workers and educational psychologists. It consisted of 3 x 4 hour sessions and was delivered weekly. |
| <b>Outcomes</b>      | The Medical Communication Index (MCI) served as the dependent variable to measure the students' responses to patients' emotional concerns<br>The Helping relationship Inventory (HRI) served to measure the dependent variable to measure the students' preferences for responses that expressed empathy or understanding.                                                                                                                                                                                                                               |

Winter R, Isa E, Roberts N, Norman RI, Howick J 2019

|              |                          |
|--------------|--------------------------|
| <b>Notes</b> | No funding source stated |
|--------------|--------------------------|

**Risk of bias table**

| Bias                                                      | Authors' judgement | Support for judgement                                                                                                                                                                                                                                                                                                                                  |
|-----------------------------------------------------------|--------------------|--------------------------------------------------------------------------------------------------------------------------------------------------------------------------------------------------------------------------------------------------------------------------------------------------------------------------------------------------------|
| Random sequence generation (selection bias)               | Unclear risk       | "All students in both the intervention and control groups attended these large group lectures. Following this instruction, the students were randomly assigned to an intervention or control group"<br>Details of random sequence generation not reported                                                                                              |
| Allocation concealment (selection bias)                   | Unclear risk       | "Part of course conducted in community nursing homes, not all students could be scheduled to participate in it at the same time. Therefore, only 134 of these students participated in the main part of the study. The remaining (excluded) students participated in the course after the study was completed."<br>Allocation concealment not reported |
| Blinding of participants and personnel (performance bias) | High risk          | "The 69 students in the control group received no other instruction in communication skills during the study. The 65 students in the intervention group were divided into four smaller groups. Each group met for four weekly, three-hour sessions."                                                                                                   |
| Blinding of outcome assessment (detection bias)           | High risk          | Self-rated outcome assessment                                                                                                                                                                                                                                                                                                                          |
| Incomplete outcome data (attrition bias)                  | Unclear risk       | 24 lost to follow up (not clearly stated) on analysis of MCI). Not explicitly stated on what number of students' basis analysis carried out, how many lost to follow up or reasons                                                                                                                                                                     |
| Selective reporting (reporting bias)                      | High risk          | Outcomes not clearly stated in methodology.                                                                                                                                                                                                                                                                                                            |
| Other bias                                                | Unclear risk       | no baseline demographics reported so cannot comment on baseline differences                                                                                                                                                                                                                                                                            |

**Wundrich 2017**

|                      |                                                                                                                                                                                                                                                          |
|----------------------|----------------------------------------------------------------------------------------------------------------------------------------------------------------------------------------------------------------------------------------------------------|
| <b>Methods</b>       | Randomised controlled trial.                                                                                                                                                                                                                             |
| <b>Participants</b>  | The country of origin was Germany.<br>158 third year medical students were randomised to either an intervention or control group.<br>No inclusion or exclusion criteria were stated.                                                                     |
| <b>Interventions</b> | A three week training course with focus on empathy: The empathy skills training consisted of an introduction course on empathy and empathy skills training with simulated patients. The duration of the intervention was 6 hours delivered over 3 weeks. |
| <b>Outcomes</b>      | The self-rated JSPE (student version) was used to measure empathy in addition to an empathy-related communications skills questionnaire completed by an observer.                                                                                        |
| <b>Notes</b>         | -                                                                                                                                                                                                                                                        |

**Risk of bias table**

| Bias                                                      | Authors' judgement | Support for judgement                                                                                                                                                                                                                 |
|-----------------------------------------------------------|--------------------|---------------------------------------------------------------------------------------------------------------------------------------------------------------------------------------------------------------------------------------|
| Random sequence generation (selection bias)               | Unclear risk       | "A total of 158 3rd year medical students at the University of Freiburg Medical Centre were assigned into an intervention group receiving an empathy training and a control group" Details of random sequence generation not reported |
| Allocation concealment (selection bias)                   | Unclear risk       | Allocation concealment not stated                                                                                                                                                                                                     |
| Blinding of participants and personnel (performance bias) | High risk          | "The intervention group participated in an empathy skills training with simulated patients (SPs). The control group participated in a history course."                                                                                |

Winter R, Isa E, Roberts N, Norman RI, Howick J 2019

|                                                 |              |                                                                                                                                       |
|-------------------------------------------------|--------------|---------------------------------------------------------------------------------------------------------------------------------------|
| Blinding of outcome assessment (detection bias) | Unclear risk | Experts and SPs were blinded to the students' group membership - low risk for observer rated outcome.<br>Self-rated outcome high risk |
| Incomplete outcome data (attrition bias)        | Unclear risk | Number analysed not reported. Missing data not reported                                                                               |
| Selective reporting (reporting bias)            | High risk    | Number analysed not reported. Missing data not reported                                                                               |
| Other bias                                      | Unclear risk | no baseline demographics reported so cannot comment on baseline differences                                                           |

Yang 2018

|                      |                                                                                                                                                                                                                                                                                                                                                                                                                                              |
|----------------------|----------------------------------------------------------------------------------------------------------------------------------------------------------------------------------------------------------------------------------------------------------------------------------------------------------------------------------------------------------------------------------------------------------------------------------------------|
| <b>Methods</b>       | Cluster randomised controlled trial                                                                                                                                                                                                                                                                                                                                                                                                          |
| <b>Participants</b>  | The country of origin was China.<br>59 'grade 3' nursing students each were randomised to two intervention arms and 59 to a control arm of the study.<br>Exclusion criteria: students who were taking doctor-patient communication- related courses and students who were planning to take those courses during the study.                                                                                                                   |
| <b>Interventions</b> | The intervention was a narrative medicine programme. Two intervention groups: One group received the theoretical education part of the programme and one intervention group received both theoretical teaching and clinical experience.<br>The theoretical component was delivered by a teacher 'well trained in narrative medicine'.<br>The clinical component was delivered by teaching nurses who had been trained in narrative medicine. |
| <b>Outcomes</b>      | The JSE (Chinese version) was administered to students at baseline and then at various follow up points post intervention: T1: January 2015 (pre-intervention), T2: July 2015 (post-step 1 intervention) T3: January 2016 (post-step 2 intervention), T4: July 2016 (0.5 years after the intervention), T5: January 2017 (1 year after the intervention), and T6: July 2017 (1.5 years after the intervention).                              |
| <b>Notes</b>         | -                                                                                                                                                                                                                                                                                                                                                                                                                                            |

Risk of bias table

| Bias                                                      | Authors' judgement | Support for judgement                                                                                                                                                                                                                                                                                                           |
|-----------------------------------------------------------|--------------------|---------------------------------------------------------------------------------------------------------------------------------------------------------------------------------------------------------------------------------------------------------------------------------------------------------------------------------|
| Random sequence generation (selection bias)               | Unclear risk       | Random sequence generation not stated.<br>"the six classes were randomly divided into three groups"                                                                                                                                                                                                                             |
| Allocation concealment (selection bias)                   | Unclear risk       | "Of the sixteen classes, six (30 students per class) were randomly selected to participate in this study."<br><br>"Taking each class as a unit, the six classes were randomly divided into three groups: one observation group (Group 1) and two experimental groups (Groups 2 and 3)."<br><br>Method of allocation not stated. |
| Blinding of participants and personnel (performance bias) | High risk          | No blinding of participants or personnel                                                                                                                                                                                                                                                                                        |
| Blinding of outcome assessment (detection bias)           | High risk          | Outcome assessors were not blinded.                                                                                                                                                                                                                                                                                             |
| Incomplete outcome data (attrition bias)                  | Low risk           | 5 participants from intervention groups and 7 controls lost to follow up. Attrition 6.6%                                                                                                                                                                                                                                        |

Winter R, Isa E, Roberts N, Norman RI, Howick J 2019

|                                      |              |                                                                                                                                                                                                       |
|--------------------------------------|--------------|-------------------------------------------------------------------------------------------------------------------------------------------------------------------------------------------------------|
| Selective reporting (reporting bias) | Low risk     | Outcomes reported as stated in methods.                                                                                                                                                               |
| Other bias                           | Unclear risk | Recruitment bias:<br>Method of randomisation not described "six [classes] were randomly selected"<br>According to methodology, no participants were recruited after the clusters had been randomised. |

eTable 4 Empathy effect summary of findings

Summary of findings:

**Empathy training compared to Control for Healthcare students and professionals**

**Patient or population:** Healthcare students and professionals  
**Setting:** University, primary care settings, secondary care settings  
**Intervention:** Empathy training  
**Comparison:** Control

| Outcomes | Anticipated absolute effects* (95% CI) |                                           | Relative effect (95% CI) | No of participants (studies) | Certainty of the evidence (GRADE) | Comments                               |
|----------|----------------------------------------|-------------------------------------------|--------------------------|------------------------------|-----------------------------------|----------------------------------------|
|          | Risk with Control                      | Risk with Empathy training                |                          |                              |                                   |                                        |
| empathy  | -                                      | SMD 0.52 SD more (0.36 more to 0.67 more) | -                        | 2024 (22 RCTs)               | ⊕⊕○○<br>LOW <sup>a,b</sup>        | Empathy training may increase empathy. |

\*The risk in the intervention group (and its 95% confidence interval) is based on the assumed risk in the comparison group and the relative effect of the intervention (and its 95% CI).

CI: Confidence interval; SMD: Standardised mean difference

**GRADE Working Group grades of evidence**

**High certainty:** We are very confident that the true effect lies close to that of the estimate of the effect

**Moderate certainty:** We are moderately confident in the effect estimate: The true effect is likely to be close to the estimate of the effect, but there is a possibility that it is substantially different

**Low certainty:** Our confidence in the effect estimate is limited: The true effect may be substantially different from the estimate of the effect

**Very low certainty:** We have very little confidence in the effect estimate: The true effect is likely to be substantially different from the estimate of effect

**Footnotes**

*a High risk of bias suspected in 11 studies (with a high or unclear risk of bias for sequence generation and allocation concealment)*

*b There was variation across all studies with type of intervention and population studied*

Winter R, Isa E, Roberts N, Norman RI, Howick J 2019

eFigure 1. Risk of bias assessment

|                             | Random sequence generation (selection bias) | Allocation concealment (selection bias) | Blinding of participants and personnel (performance bias) | Blinding of outcome assessment (detection bias) | Incomplete outcome data (attrition bias) | Selective reporting (reporting bias) | Other bias |
|-----------------------------|---------------------------------------------|-----------------------------------------|-----------------------------------------------------------|-------------------------------------------------|------------------------------------------|--------------------------------------|------------|
| <b>Alhassan 2019</b>        | +                                           | +                                       | -                                                         | -                                               | +                                        | +                                    | +          |
| <b>Arthur 2017</b>          | +                                           | +                                       | -                                                         | -                                               | -                                        | +                                    | +          |
| <b>Blair Irvine 2012</b>    | ?                                           | ?                                       | -                                                         | ?                                               | +                                        | +                                    | ?          |
| <b>Buffel Du Vaure 2017</b> | +                                           | ?                                       | -                                                         | ?                                               | +                                        | +                                    | +          |
| <b>Butow 2007</b>           | +                                           | +                                       | -                                                         | ?                                               | ?                                        | +                                    | -          |
| <b>Collins 2017</b>         | ?                                           | ?                                       | -                                                         | ?                                               | +                                        | +                                    | +          |
| <b>Daniels 1998</b>         | ?                                           | ?                                       | -                                                         | -                                               | ?                                        | -                                    | ?          |
| <b>Foster 2016</b>          | -                                           | ?                                       | ?                                                         | +                                               | +                                        | ?                                    | +          |
| <b>Gholamzadeh 2018</b>     | +                                           | ?                                       | -                                                         | -                                               | +                                        | -                                    | +          |
| <b>Gould 2017</b>           | +                                           | +                                       | -                                                         | -                                               | -                                        | -                                    | ?          |
| <b>Hastings 2018</b>        | +                                           | +                                       | -                                                         | -                                               | -                                        | +                                    | +          |
| <b>Hattink 2015</b>         | +                                           | +                                       | -                                                         | -                                               | -                                        | +                                    | +          |
| <b>Larti 2018</b>           | +                                           | +                                       | -                                                         | -                                               | +                                        | +                                    |            |
| <b>Lobchuck 2018</b>        | +                                           | ?                                       | -                                                         | ?                                               | +                                        | ?                                    | ?          |
| <b>Lor 2014</b>             | ?                                           | ?                                       | -                                                         | -                                               | +                                        | +                                    | +          |
| <b>LoSasso 2017</b>         | ?                                           | ?                                       | -                                                         | ?                                               | +                                        | +                                    | +          |
| <b>Mueller 2018</b>         | +                                           | +                                       | -                                                         | -                                               | +                                        | +                                    | -          |
| <b>Reiss 2012</b>           | +                                           | +                                       | -                                                         | ?                                               | +                                        | +                                    | +          |
| <b>Shapiro 1998</b>         | ?                                           | ?                                       | -                                                         | ?                                               | +                                        | -                                    | +          |
| <b>Sripada 2010</b>         | ?                                           | ?                                       | -                                                         | ?                                               | +                                        | -                                    | ?          |
| <b>Sterkenburg 2018</b>     | +                                           | +                                       | +                                                         | +                                               | +                                        | +                                    | +          |
| <b>Tulsky 2011</b>          | +                                           | +                                       | -                                                         | +                                               | +                                        | +                                    | +          |
| <b>Vaghee 2018</b>          | ?                                           | ?                                       | -                                                         | -                                               | +                                        | -                                    | ?          |
| <b>Wolf 1987</b>            | ?                                           | ?                                       | -                                                         | -                                               | ?                                        | -                                    | ?          |
| <b>Wundrich 2017</b>        | ?                                           | ?                                       | -                                                         | ?                                               | ?                                        | -                                    | ?          |
| <b>Yang 2018</b>            | ?                                           | ?                                       | -                                                         | -                                               | +                                        | +                                    | ?          |

review only

Winter R, Isa E, Roberts N, Norman RI, Howick J 2019

eFigure 2. Meta-analysis of sub-groups according to type of intervention

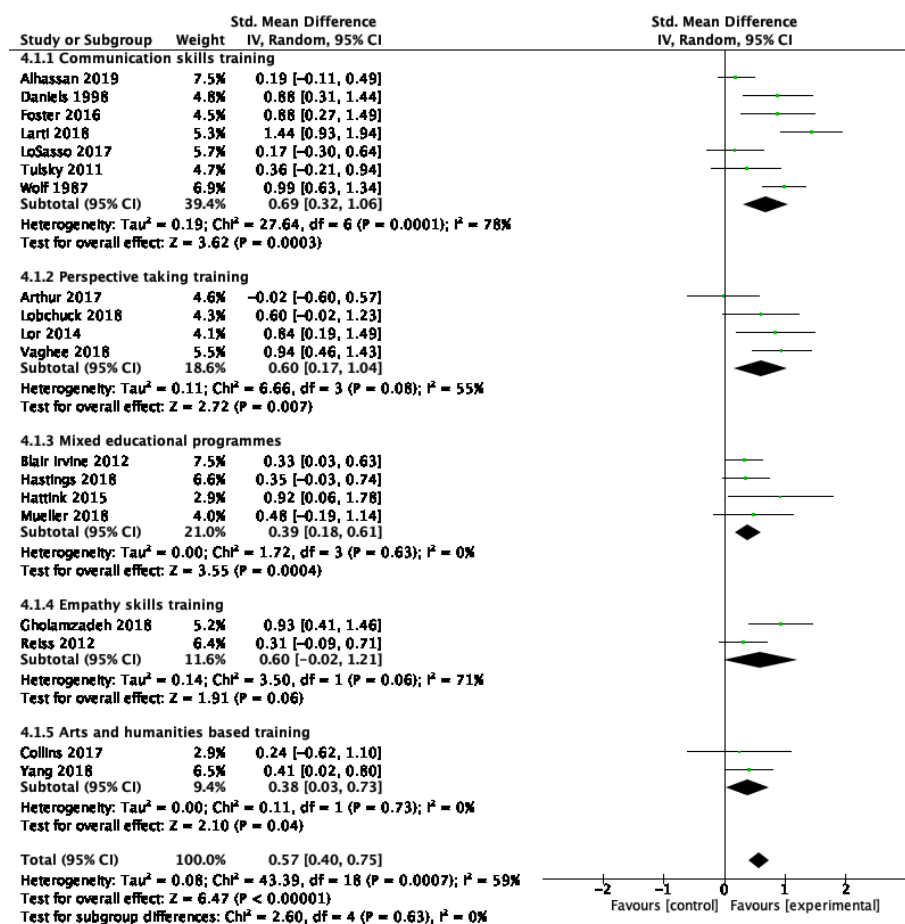

eFigure 3. Meta-analysis of sub-groups according to duration of intervention

Winter R, Isa E, Roberts N, Norman RI, Howick J 2019

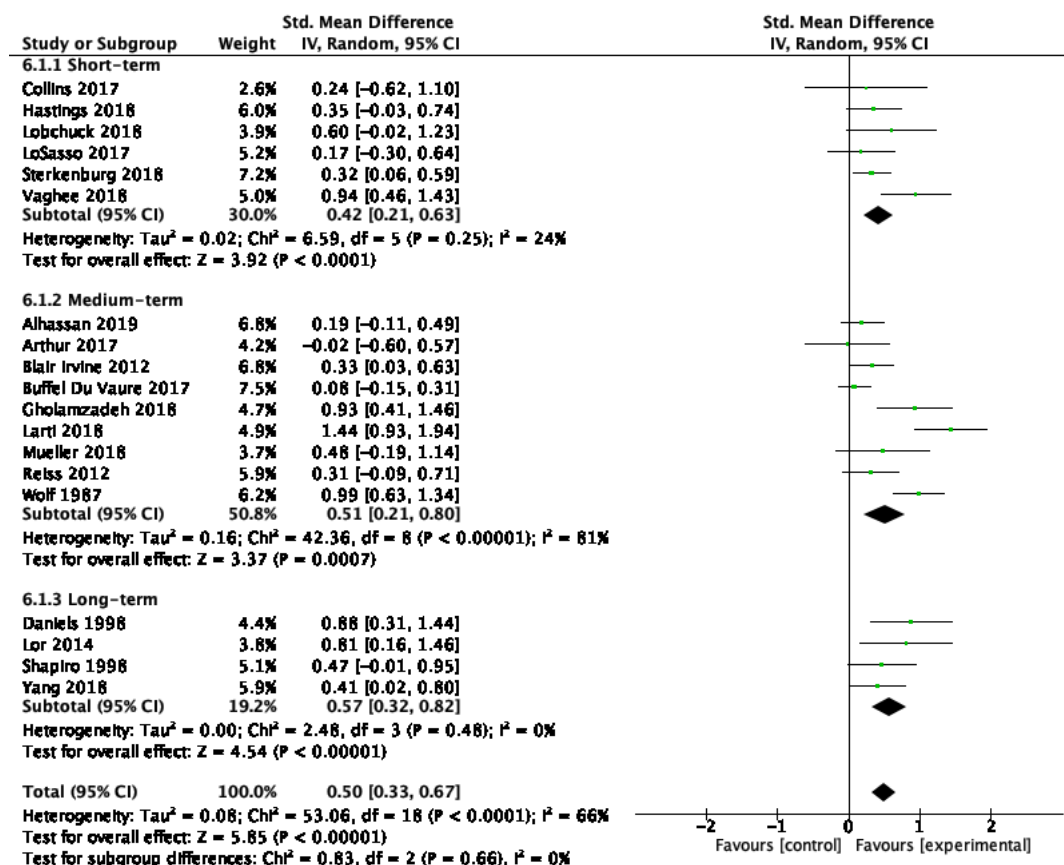

eFigure 4 Meta-analysis of subgroups according to participant population

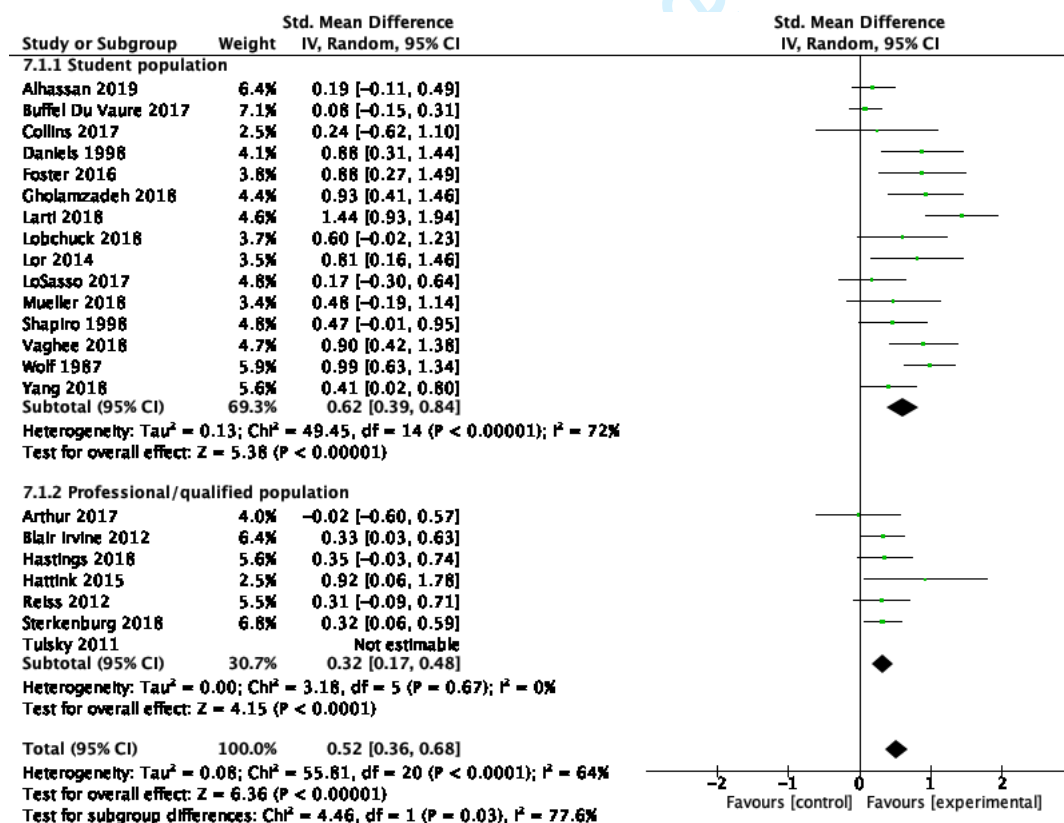

Winter R, Isa E, Roberts N, Norman RI, Howick J 2019

eFigure 5 Meta-analysis of subgroups according to outcome assessor

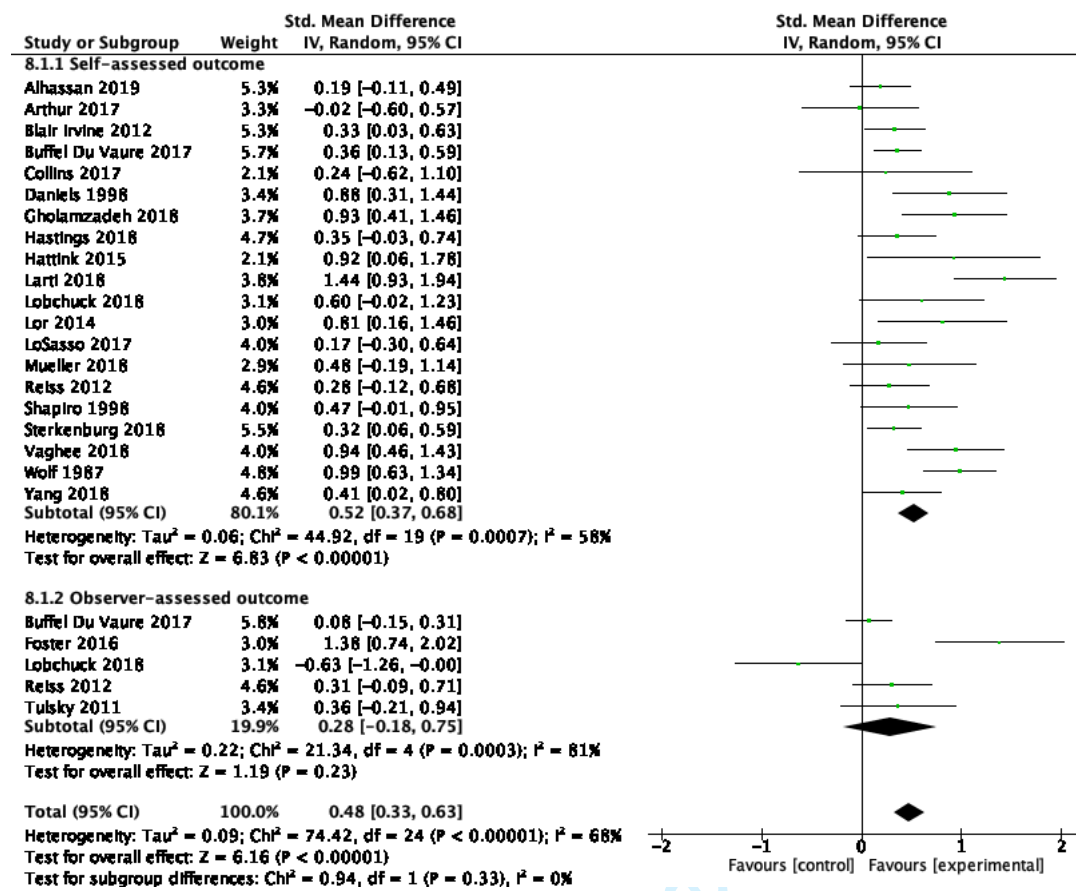



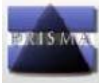

# PRISMA-DTA Checklist

1  
2  
3  
4  
5  
6  
7  
8  
9  
10  
11  
12  
13  
14  
15  
16  
17  
18  
19  
20  
21  
22  
23  
24  
25  
26  
27  
28  
29  
30  
31  
32  
33  
34  
35  
36  
37  
38  
39  
40  
41  
42  
43  
44  
45  
46  
47

| Section/topic                   | #  | PRISMA-DTA Checklist Item                                                                                                                                                                                                                                                                                                                                                                                                                | Reported on page # |
|---------------------------------|----|------------------------------------------------------------------------------------------------------------------------------------------------------------------------------------------------------------------------------------------------------------------------------------------------------------------------------------------------------------------------------------------------------------------------------------------|--------------------|
| <b>TITLE / ABSTRACT</b>         |    |                                                                                                                                                                                                                                                                                                                                                                                                                                          |                    |
| Title                           | 1  | Identify the report as a systematic review (+/- meta-analysis) of diagnostic test accuracy (DTA) studies.                                                                                                                                                                                                                                                                                                                                | 1                  |
| Abstract                        | 2  | Abstract: See PRISMA-DTA for abstracts.                                                                                                                                                                                                                                                                                                                                                                                                  | 2                  |
| <b>INTRODUCTION</b>             |    |                                                                                                                                                                                                                                                                                                                                                                                                                                          |                    |
| Rationale                       | 3  | Describe the rationale for the review in the context of what is already known.                                                                                                                                                                                                                                                                                                                                                           | 3                  |
| Clinical role of index test     | D1 | State the scientific and clinical background, including the intended use and clinical role of the index test, and if applicable, the rationale for minimally acceptable test accuracy (or minimum difference in accuracy for comparative design).                                                                                                                                                                                        |                    |
| Objectives                      | 4  | Provide an explicit statement of question(s) being addressed in terms of participants, index test(s), and target condition(s).                                                                                                                                                                                                                                                                                                           | 5                  |
| <b>METHODS</b>                  |    |                                                                                                                                                                                                                                                                                                                                                                                                                                          |                    |
| Protocol and registration       | 5  | Indicate if a review protocol exists, if and where it can be accessed (e.g., Web address), and, if available, provide registration information including registration number.                                                                                                                                                                                                                                                            | 6                  |
| Eligibility criteria            | 6  | Specify study characteristics (participants, setting, index test(s), reference standard(s), target condition(s), and study design) and report characteristics (e.g., years considered, language, publication status) used as criteria for eligibility, giving rationale.                                                                                                                                                                 | 6                  |
| Information sources             | 7  | Describe all information sources (e.g., databases with dates of coverage, contact with study authors to identify additional studies) in the search and date last searched.                                                                                                                                                                                                                                                               | 7                  |
| Search                          | 8  | Present full search strategies for all electronic databases and other sources searched, including any limits used, such that they could be repeated.                                                                                                                                                                                                                                                                                     | 7                  |
| Study selection                 | 9  | State the process for selecting studies (i.e., screening, eligibility, included in systematic review, and, if applicable, included in the meta-analysis).                                                                                                                                                                                                                                                                                | 7                  |
| Data collection process         | 10 | Describe method of data extraction from reports (e.g., piloted forms, independently, in duplicate) and any processes for obtaining and confirming data from investigators.                                                                                                                                                                                                                                                               | 7                  |
| Definitions for data extraction | 11 | Provide definitions used in data extraction and classifications of target condition(s), index test(s), reference standard(s) and other characteristics (e.g. study design, clinical setting).                                                                                                                                                                                                                                            |                    |
| Risk of bias and applicability  | 12 | Describe methods used for assessing risk of bias in individual studies and concerns regarding the applicability to the review question.                                                                                                                                                                                                                                                                                                  | 8                  |
| Diagnostic accuracy measures    | 13 | State the principal diagnostic accuracy measure(s) reported (e.g. sensitivity, specificity) and state the unit of assessment (e.g. per-patient, per-lesion).                                                                                                                                                                                                                                                                             |                    |
| Synthesis of results            | 14 | Describe methods of handling data, combining results of studies and describing variability between studies. This could include, but is not limited to: a) handling of multiple definitions of target condition. b) handling of multiple thresholds of test positivity, c) handling multiple index test readers, d) handling of indeterminate test results, e) grouping and comparing tests, f) handling of different reference standards | 8                  |

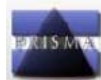

# PRISMA-DTA Checklist

1  
2  
3  
4  
5  
6  
7  
8  
9  
10  
11  
12  
13  
14  
15  
16  
17  
18  
19  
20  
21  
22  
23  
24  
25  
26  
27  
28  
29  
30  
31  
32  
33  
34  
35  
36  
37  
38  
39  
40  
41  
42  
43  
44  
45  
46  
47

| Section/topic                  | #  | PRISMA-DTA Checklist Item                                                                                                                                                                                                                                                                         | Reported on page # |
|--------------------------------|----|---------------------------------------------------------------------------------------------------------------------------------------------------------------------------------------------------------------------------------------------------------------------------------------------------|--------------------|
| Meta-analysis                  | D2 | Report the statistical methods used for meta-analyses, if performed.                                                                                                                                                                                                                              | 9                  |
| Additional analyses            | 16 | Describe methods of additional analyses (e.g., sensitivity or subgroup analyses, meta-regression), if done, indicating which were pre-specified.                                                                                                                                                  | 9                  |
| <b>RESULTS</b>                 |    |                                                                                                                                                                                                                                                                                                   |                    |
| Study selection                | 17 | Provide numbers of studies screened, assessed for eligibility, included in the review (and included in meta-analysis, if applicable) with reasons for exclusions at each stage, ideally with a flow diagram.                                                                                      | 11                 |
| Study characteristics          | 18 | For each included study provide citations and present key characteristics including: a) participant characteristics (presentation, prior testing), b) clinical setting, c) study design, d) target condition definition, e) index test, f) reference standard, g) sample size, h) funding sources | 12                 |
| Risk of bias and applicability | 19 | Present evaluation of risk of bias and concerns regarding applicability for each study.                                                                                                                                                                                                           | 16                 |
| Results of individual studies  | 20 | For each analysis in each study (e.g. unique combination of index test, reference standard, and positivity threshold) report 2x2 data (TP, FP, FN, TN) with estimates of diagnostic accuracy and confidence intervals, ideally with a forest or receiver operator characteristic (ROC) plot.      | 16                 |
| Synthesis of results           | 21 | Describe test accuracy, including variability; if meta-analysis was done, include results and confidence intervals.                                                                                                                                                                               | 17                 |
| Additional analysis            | 23 | Give results of additional analyses, if done (e.g., sensitivity or subgroup analyses, meta-regression; analysis of index test: failure rates, proportion of inconclusive results, adverse events).                                                                                                | 18                 |
| <b>DISCUSSION</b>              |    |                                                                                                                                                                                                                                                                                                   |                    |
| Summary of evidence            | 24 | Summarize the main findings including the strength of evidence.                                                                                                                                                                                                                                   | 21                 |
| Limitations                    | 25 | Discuss limitations from included studies (e.g. risk of bias and concerns regarding applicability) and from the review process (e.g. incomplete retrieval of identified research).                                                                                                                | 21                 |
| Conclusions                    | 26 | Provide a general interpretation of the results in the context of other evidence. Discuss implications for future research and clinical practice (e.g. the intended use and clinical role of the index test).                                                                                     | 22                 |
| <b>FUNDING</b>                 |    |                                                                                                                                                                                                                                                                                                   |                    |
| Funding                        | 27 | For the systematic review, describe the sources of funding and other support and the role of the funders.                                                                                                                                                                                         |                    |

Adapted From: McInnes MDF, Moher D, Thoms BD, McGrath TA, Bossuyt PM, The PRISMA-DTA Group (2018). Preferred Reporting Items for a Systematic Review and Meta-analysis of Diagnostic Test Accuracy Studies: The PRISMA-DTA Statement. JAMA. 2018 Jan 23;319(4):388-396. doi: 10.1001/jama.2017.19163.

For more information, visit: [www.prisma-statement.org](http://www.prisma-statement.org).
